# Supplementary material for: Spiro-condensation of 5-methoxycarbonyl-1H-pyrrole-2,3-diones with cyclic enoles to form spiro substituted furo[3,2-c]-coumarins and quinolines
Source: Royal Society of Chemistry journal article supplement (doi:10.1039/c6ra16889b), 2016-01-01
Supplement: c6ra16889b1.pdf [file c6ra16889b1.pdf]

## Supporting Information

### **Spiro-condensation of 5-Methoxycarbonyl-1*H*-Pyrrole-2,3-diones with Cyclic Enoles to Form Spiro Substituted Furo[3,2-*c*]- coumarins and Quinolines**

Alexey Yu. Dubovtsev,<sup>a</sup> Pavel S. Silaichev,<sup>a</sup> Mikhail A. Nazarov,<sup>a</sup> Maksim V. Dmitriev,<sup>a</sup>  
Andrey N. Maslivets,<sup>\*a</sup> and Michael Rubin<sup>\*b,c</sup>

*a.* Department of Chemistry, Perm State University, ul. Bukireva 15, Perm 614990, Russia, E-mail: [koh2@psu.ru](mailto:koh2@psu.ru)

*b.* Department of Chemistry, North Caucasus Federal University, 1a Pushkin St., Stavropol 355009, Russian Federation

*c.* Department of Chemistry, University of Kansas, 1251 Wescoe Hall Dr., Lawrence, KS 66045-7582, USA. E-mail: [mrubin@ku.edu](mailto:mrubin@ku.edu);  
Fax: +1 (785) 864-5396; Tel: +1 (785) 864-5071

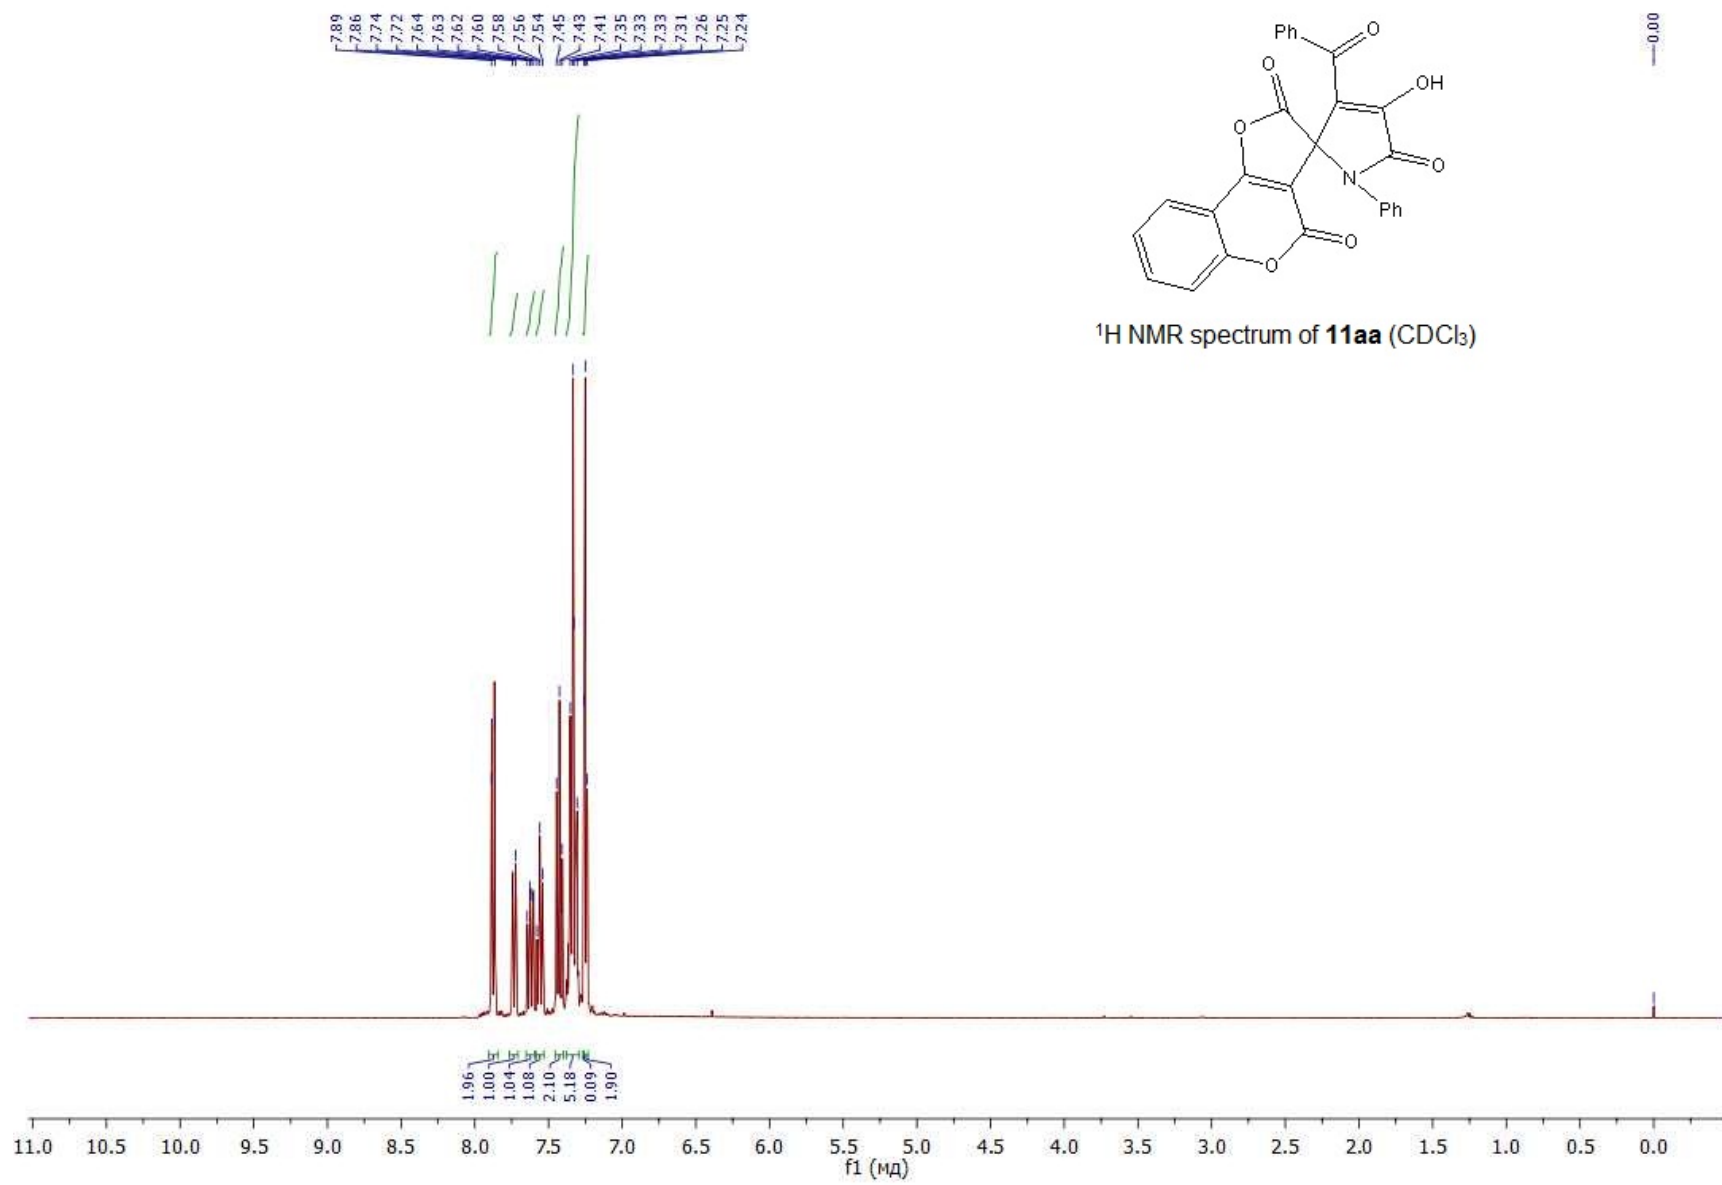

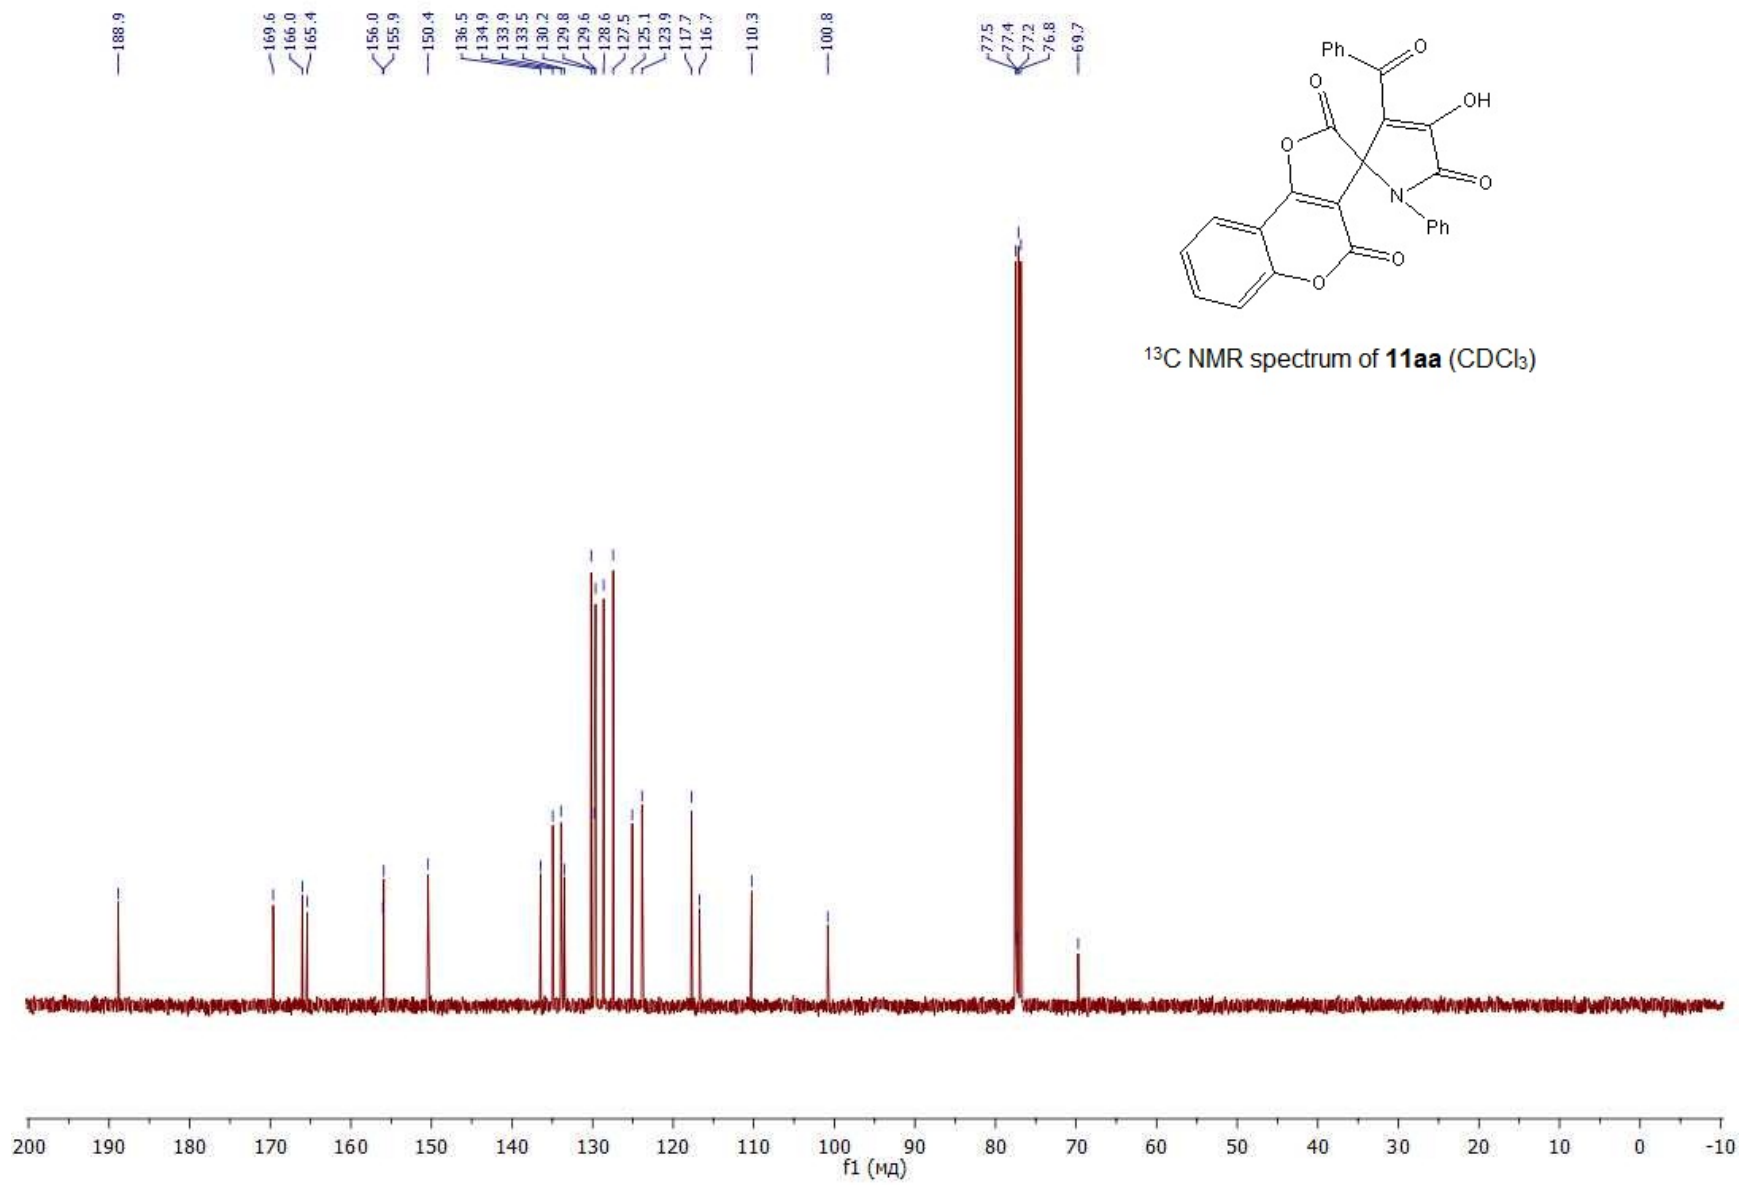

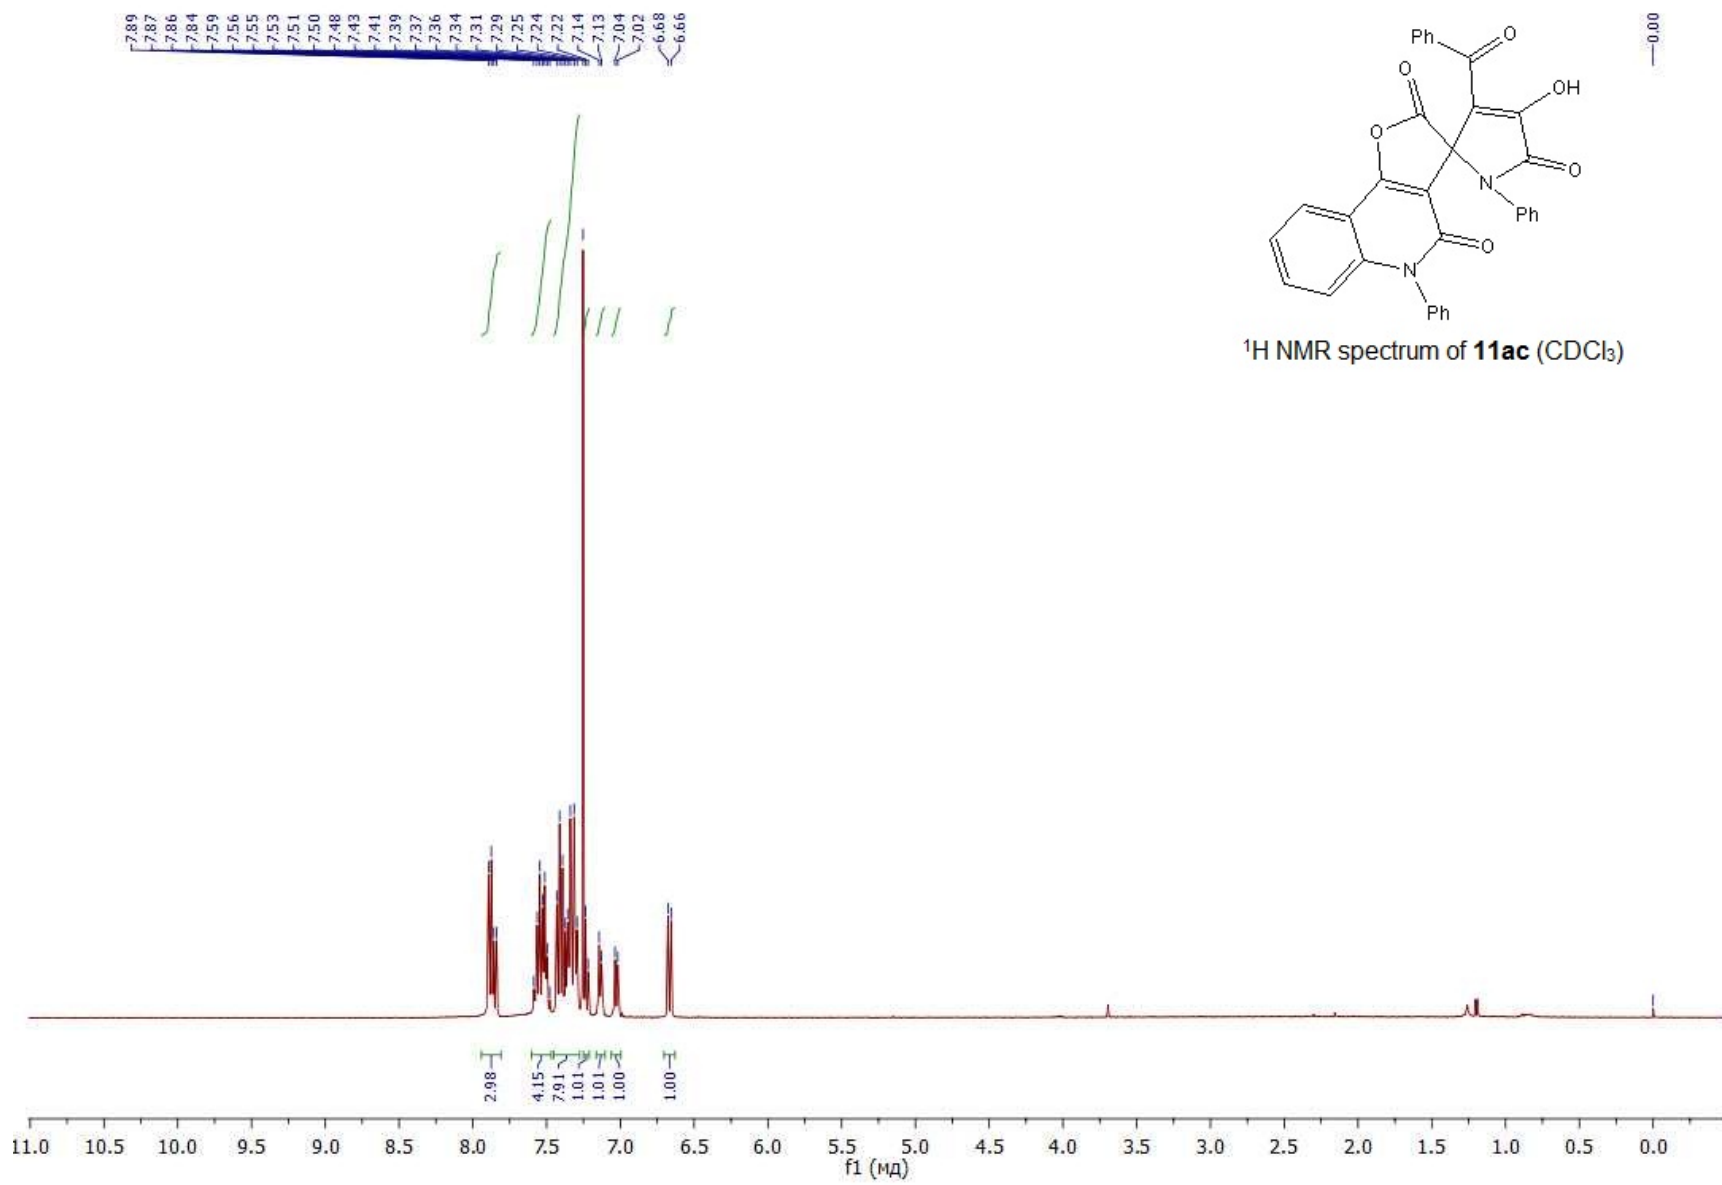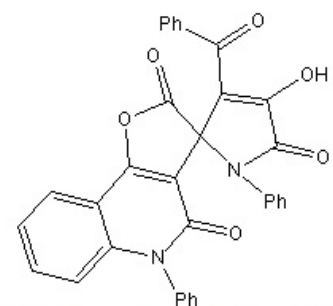

<sup>1</sup>H NMR spectrum of **11ac** (CDCl<sub>3</sub>)



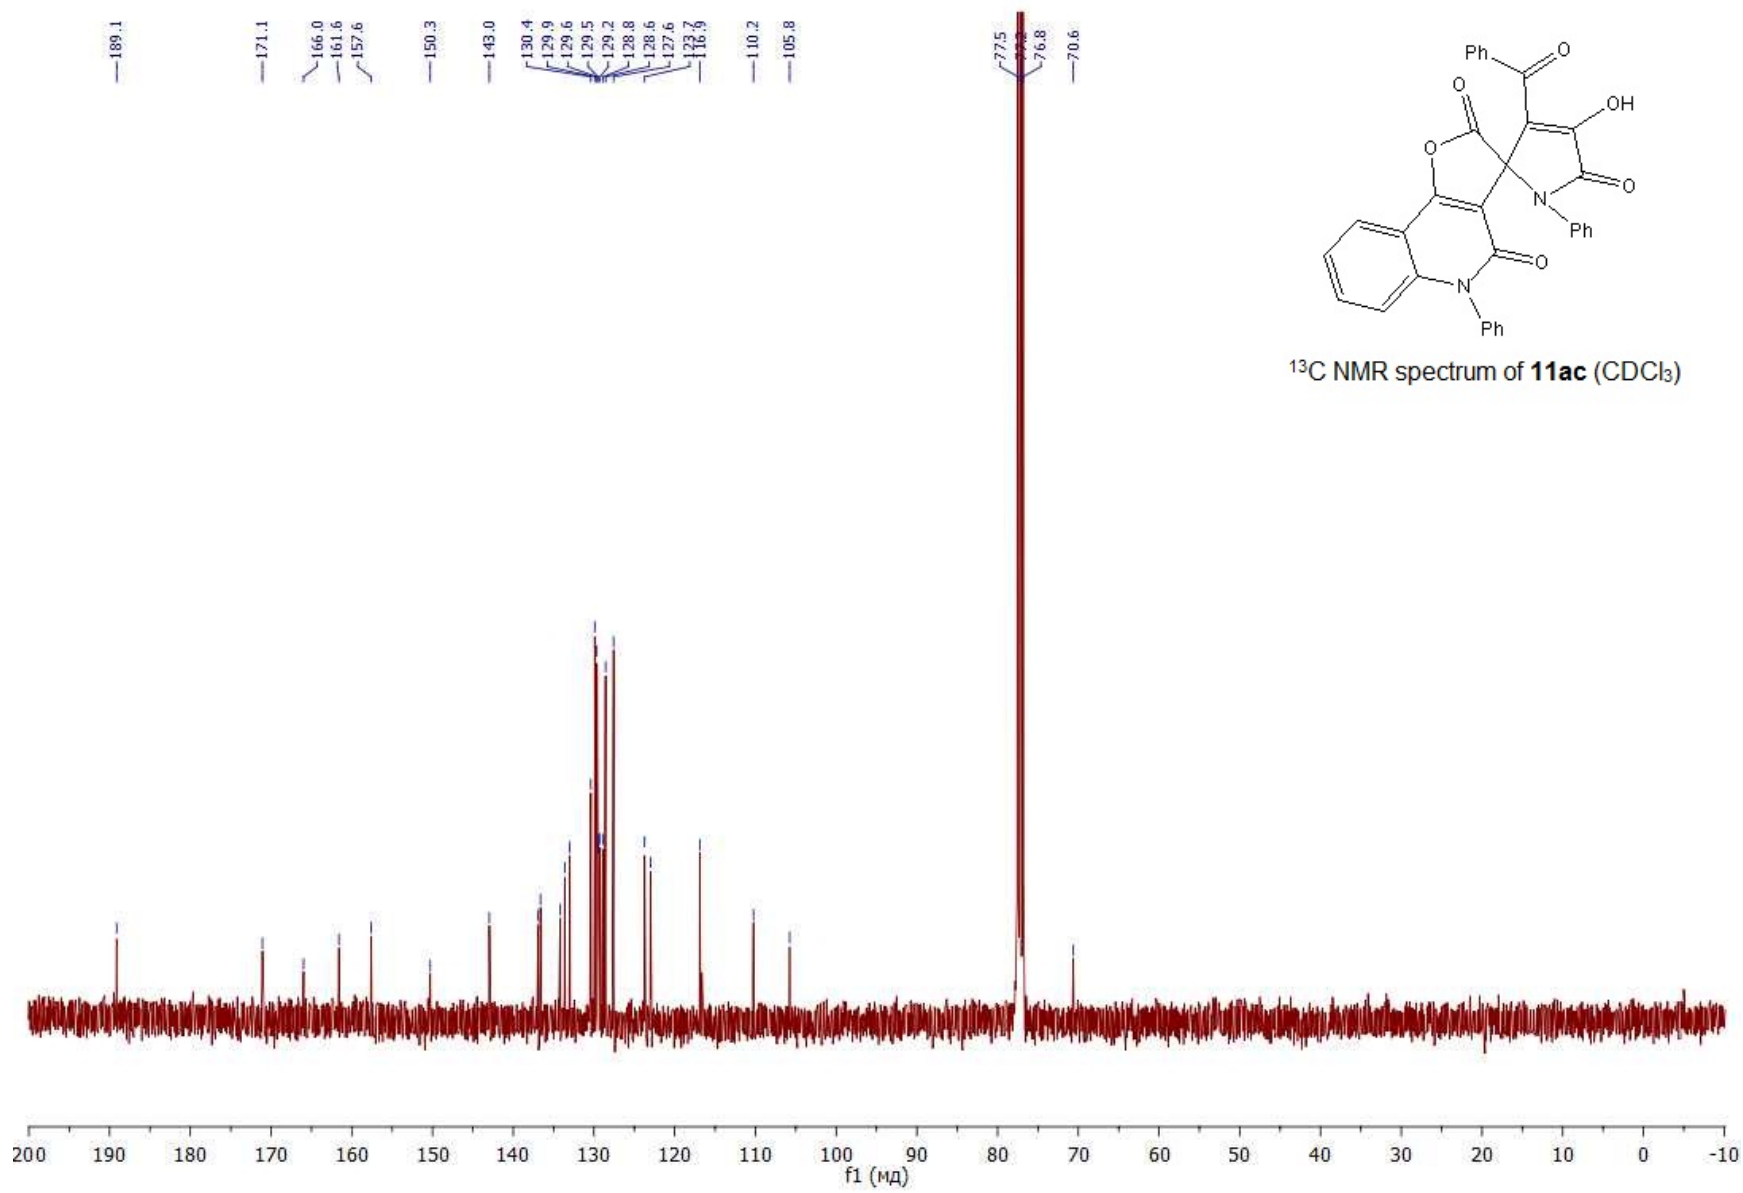

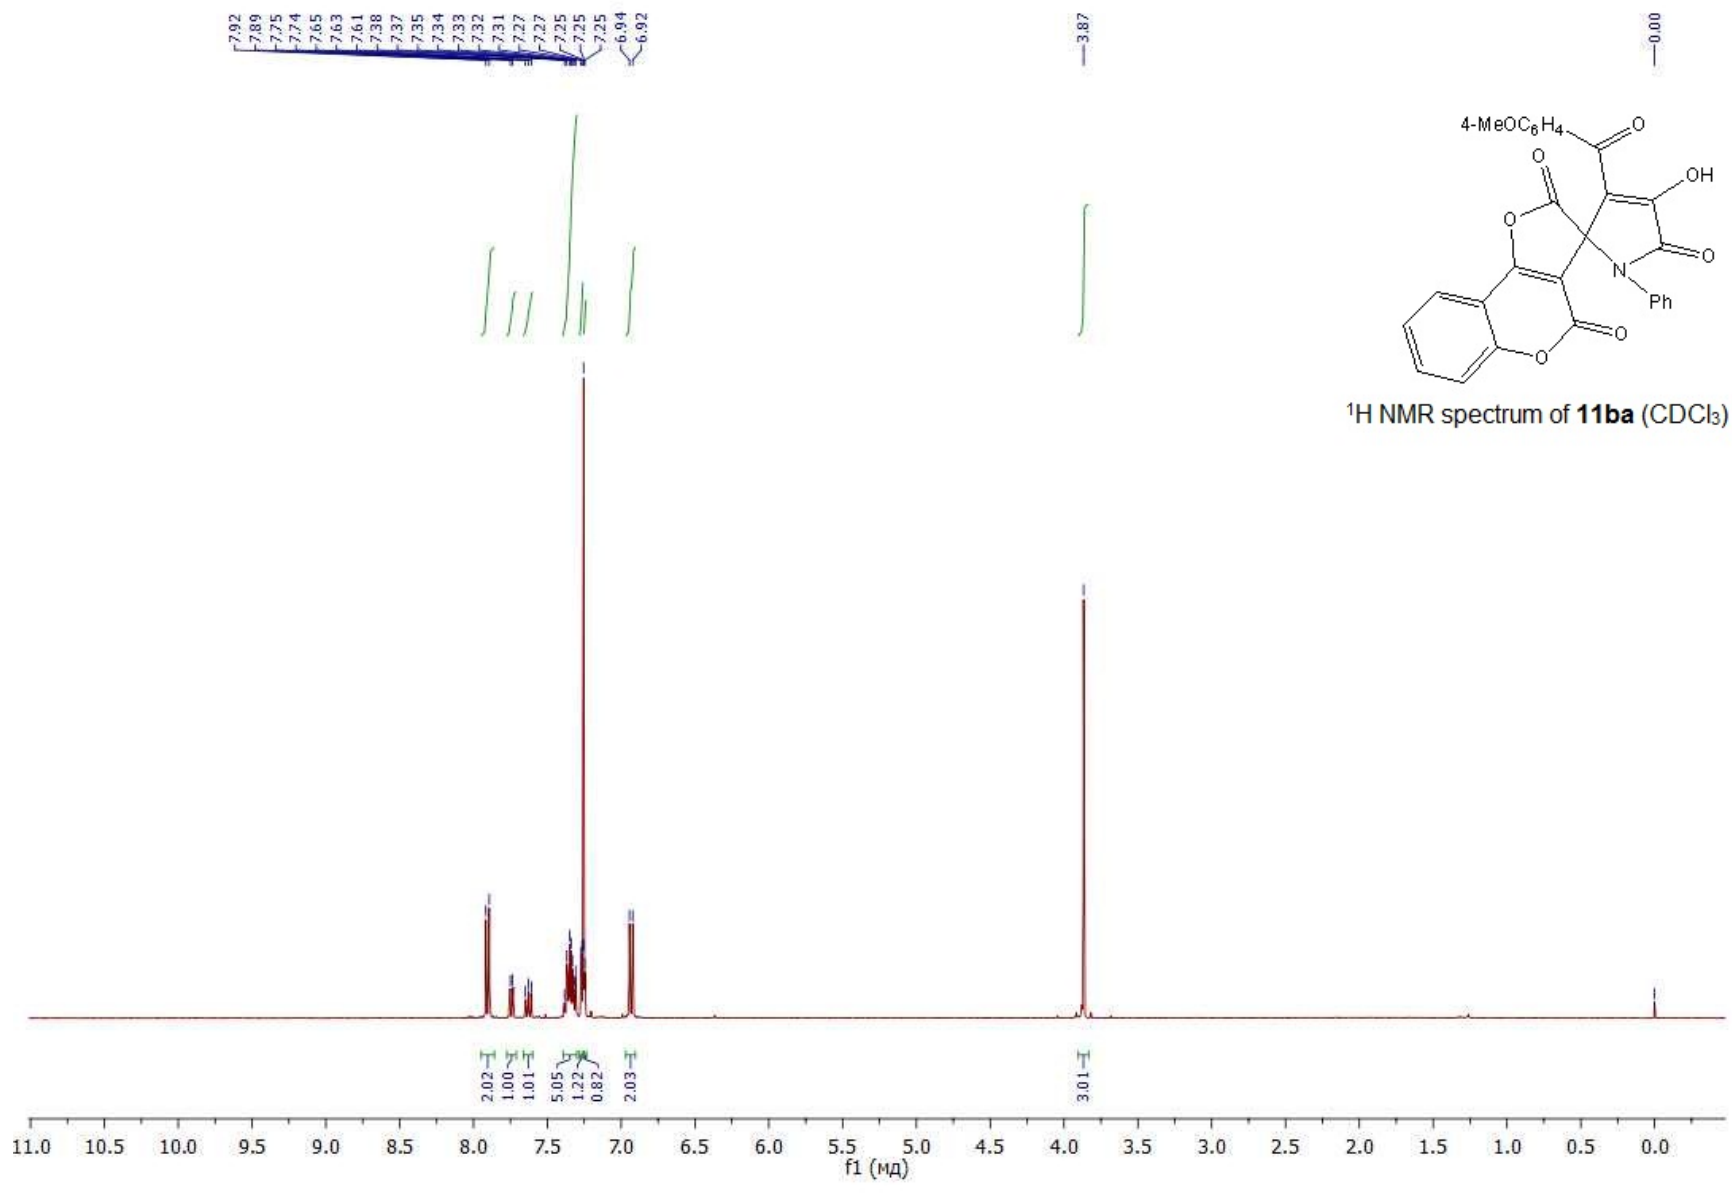

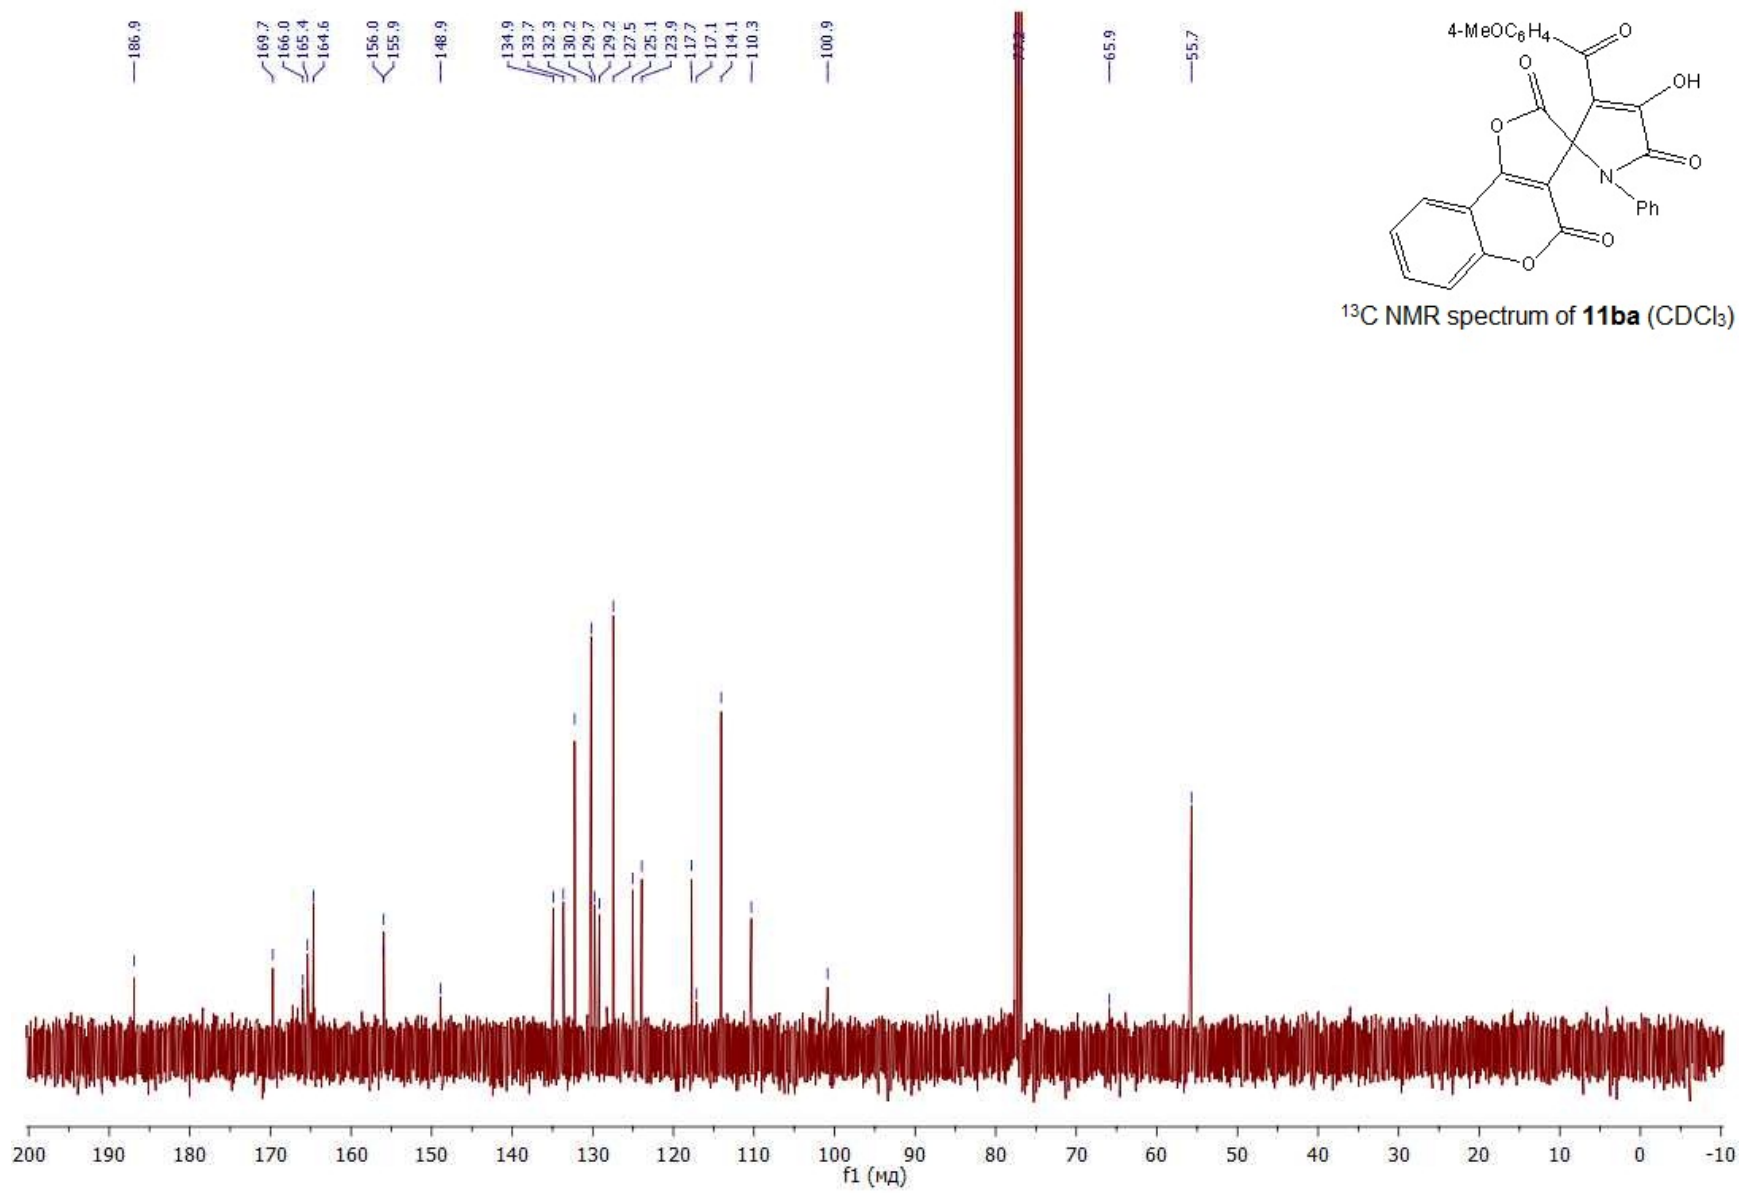

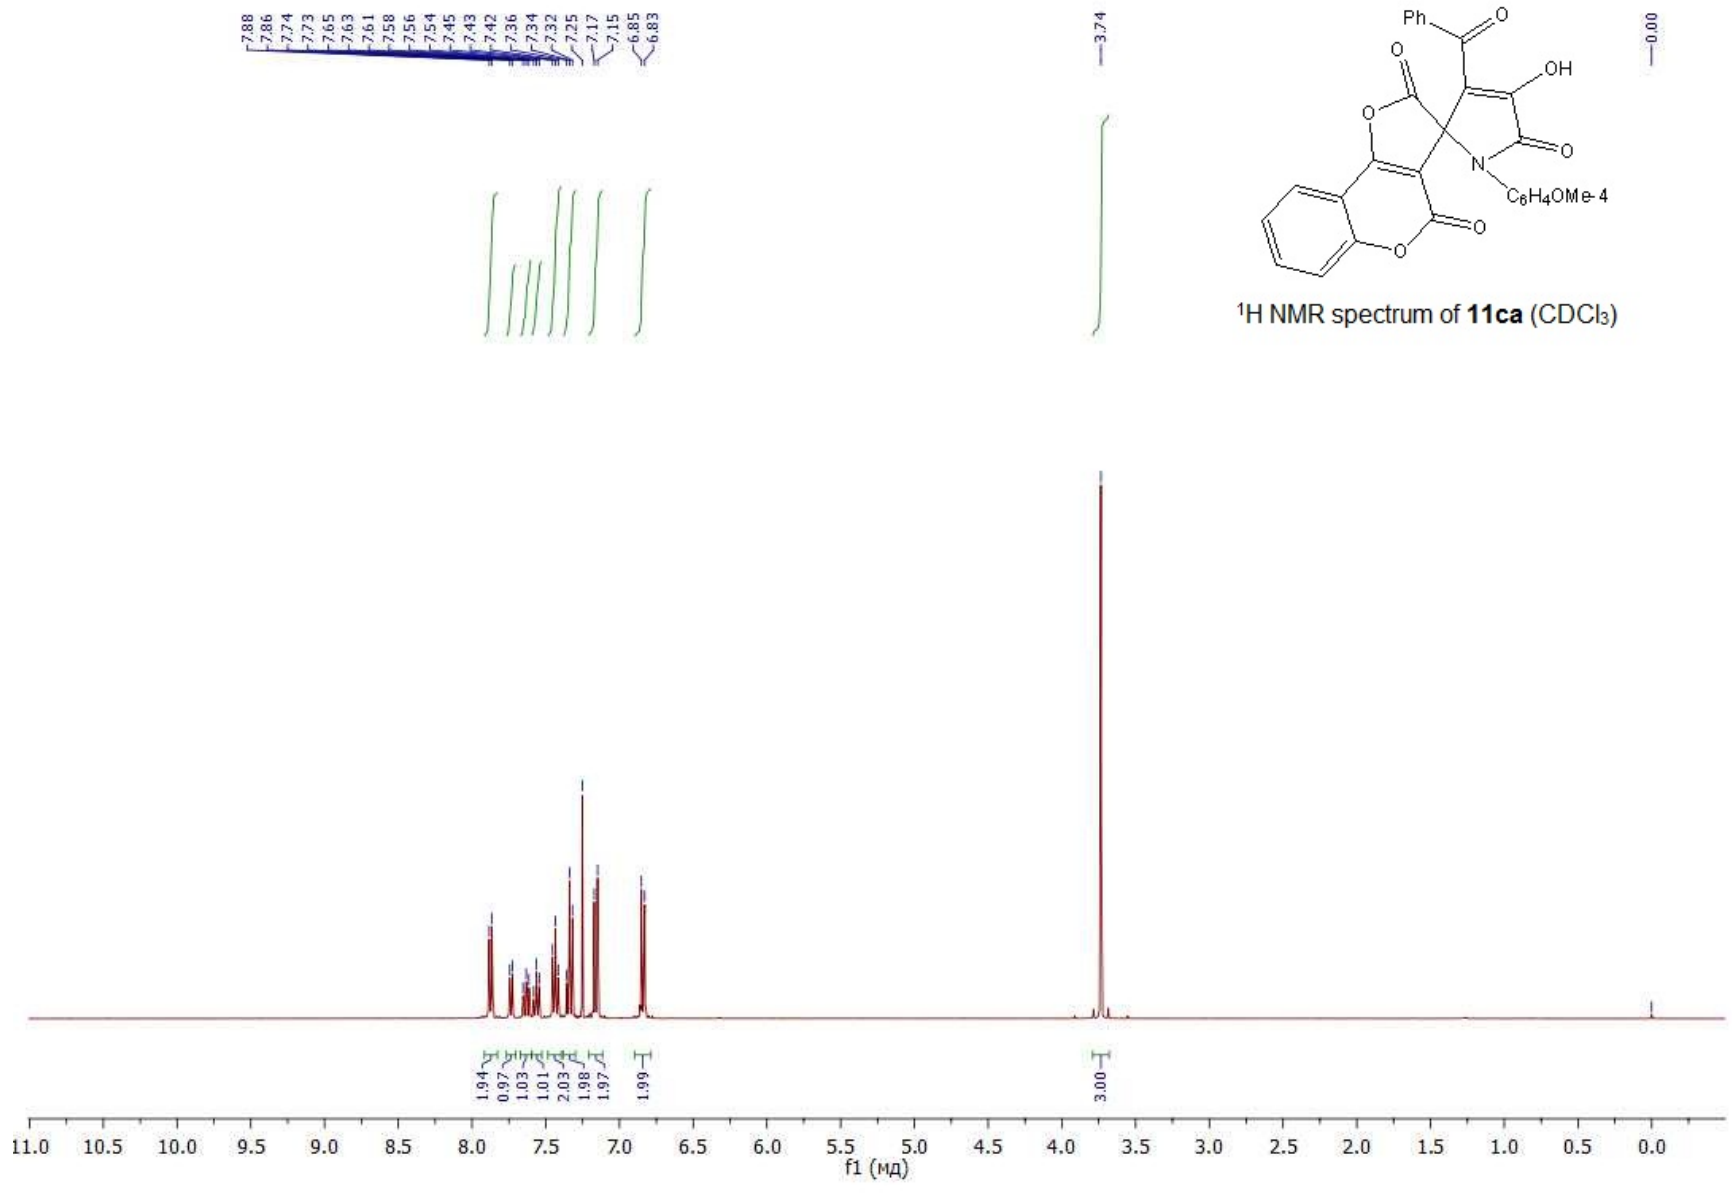

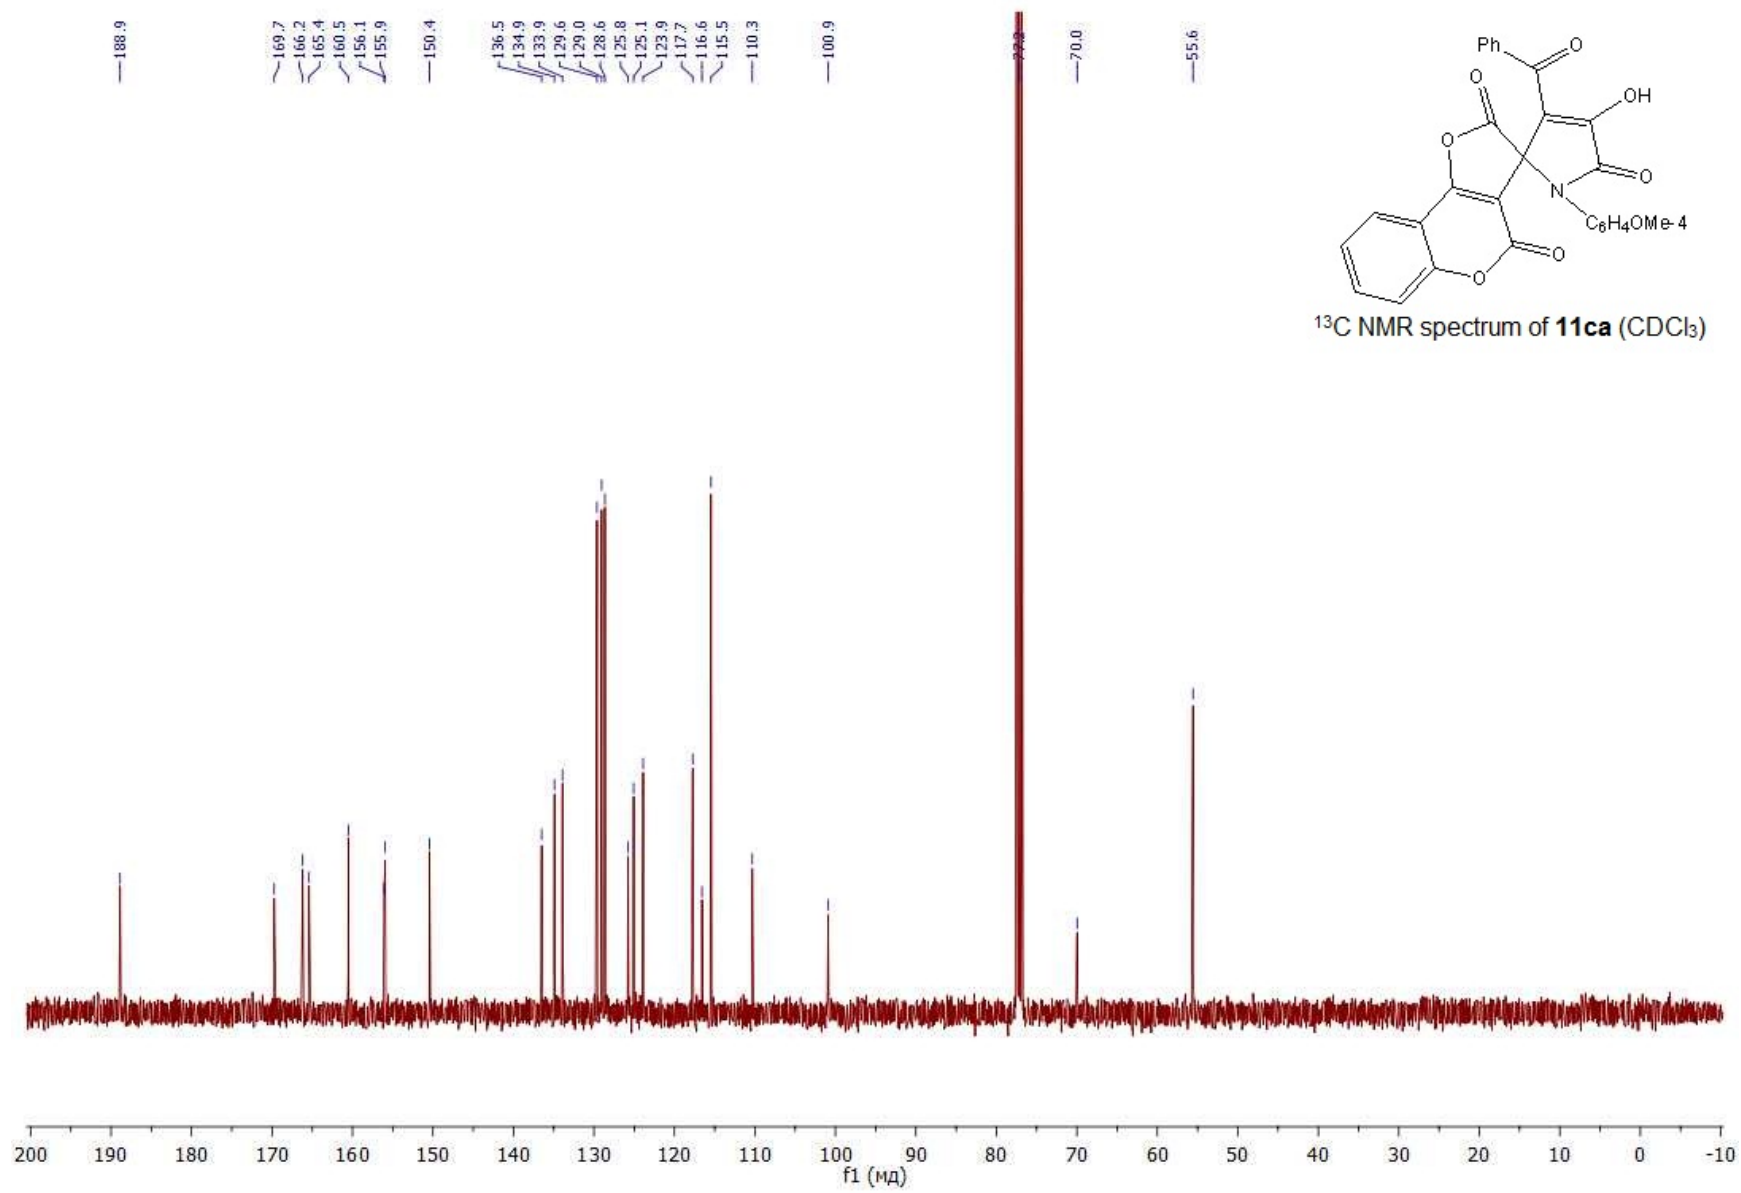

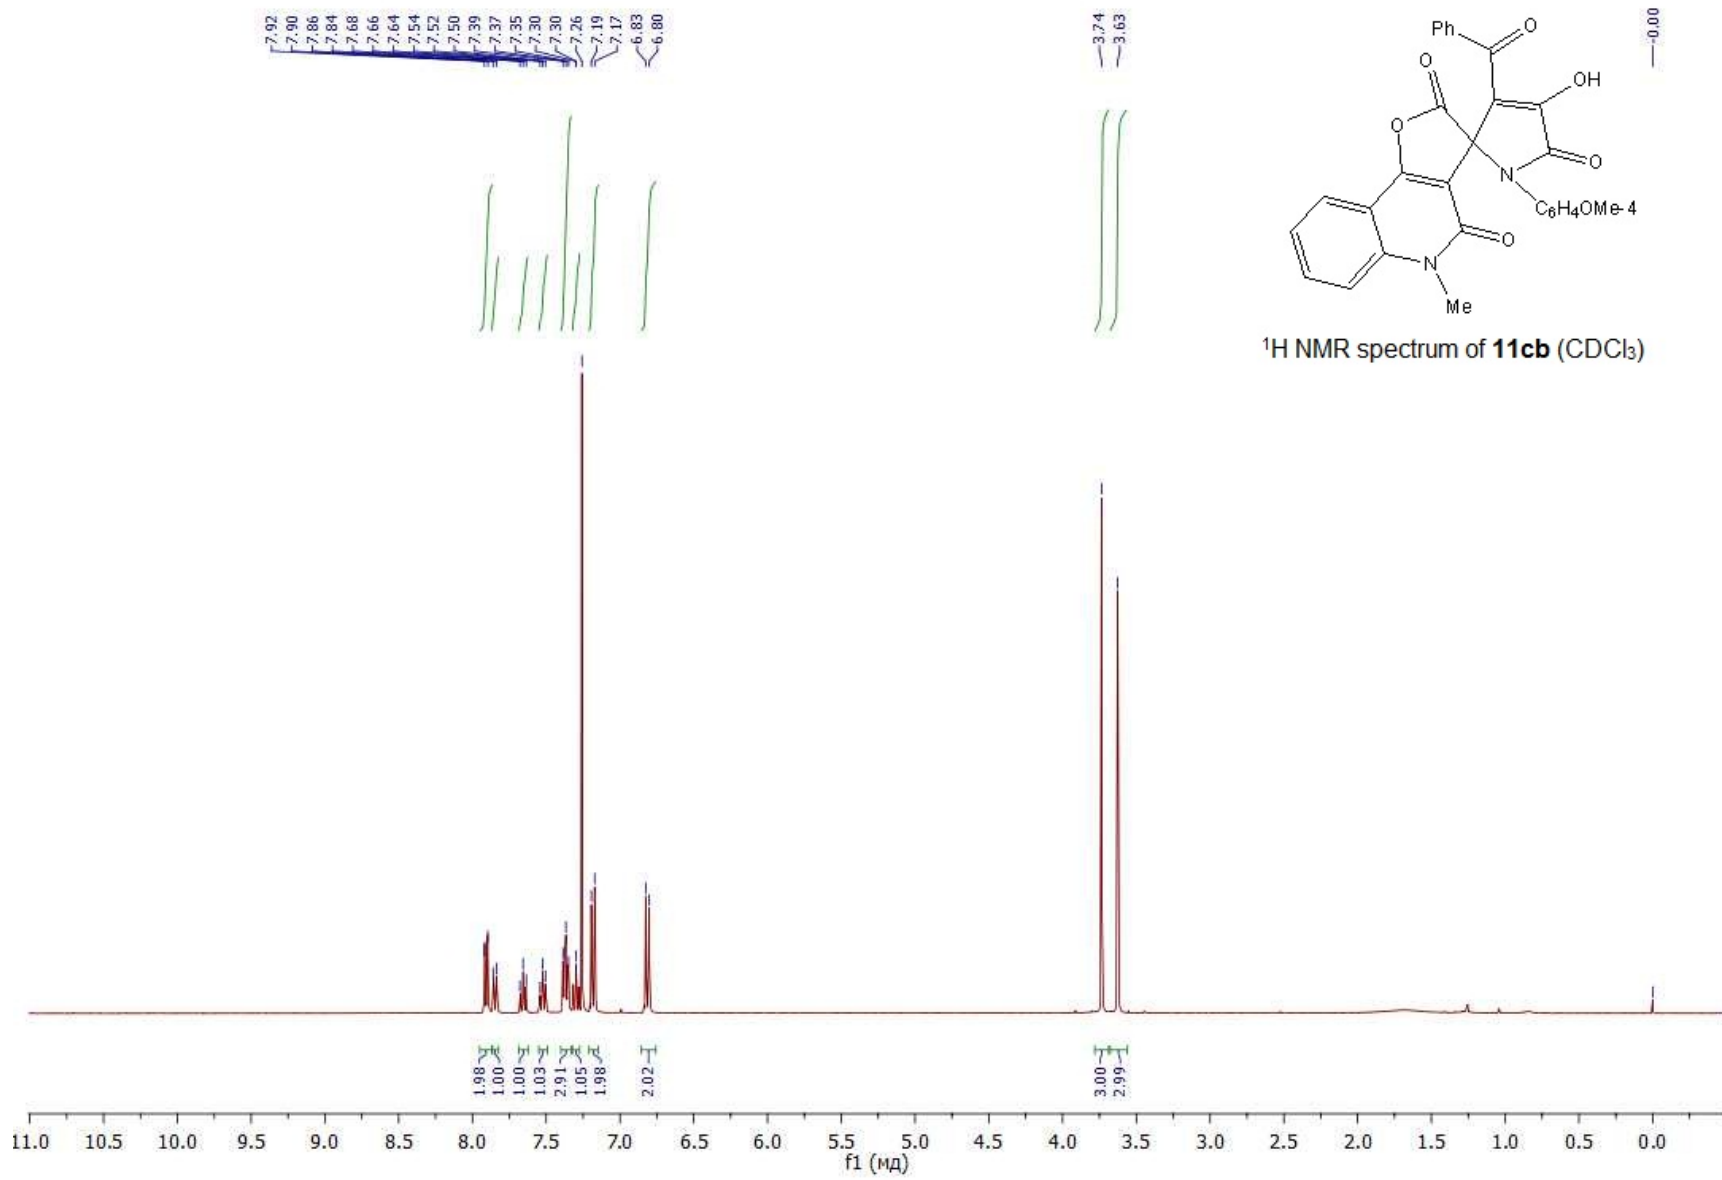

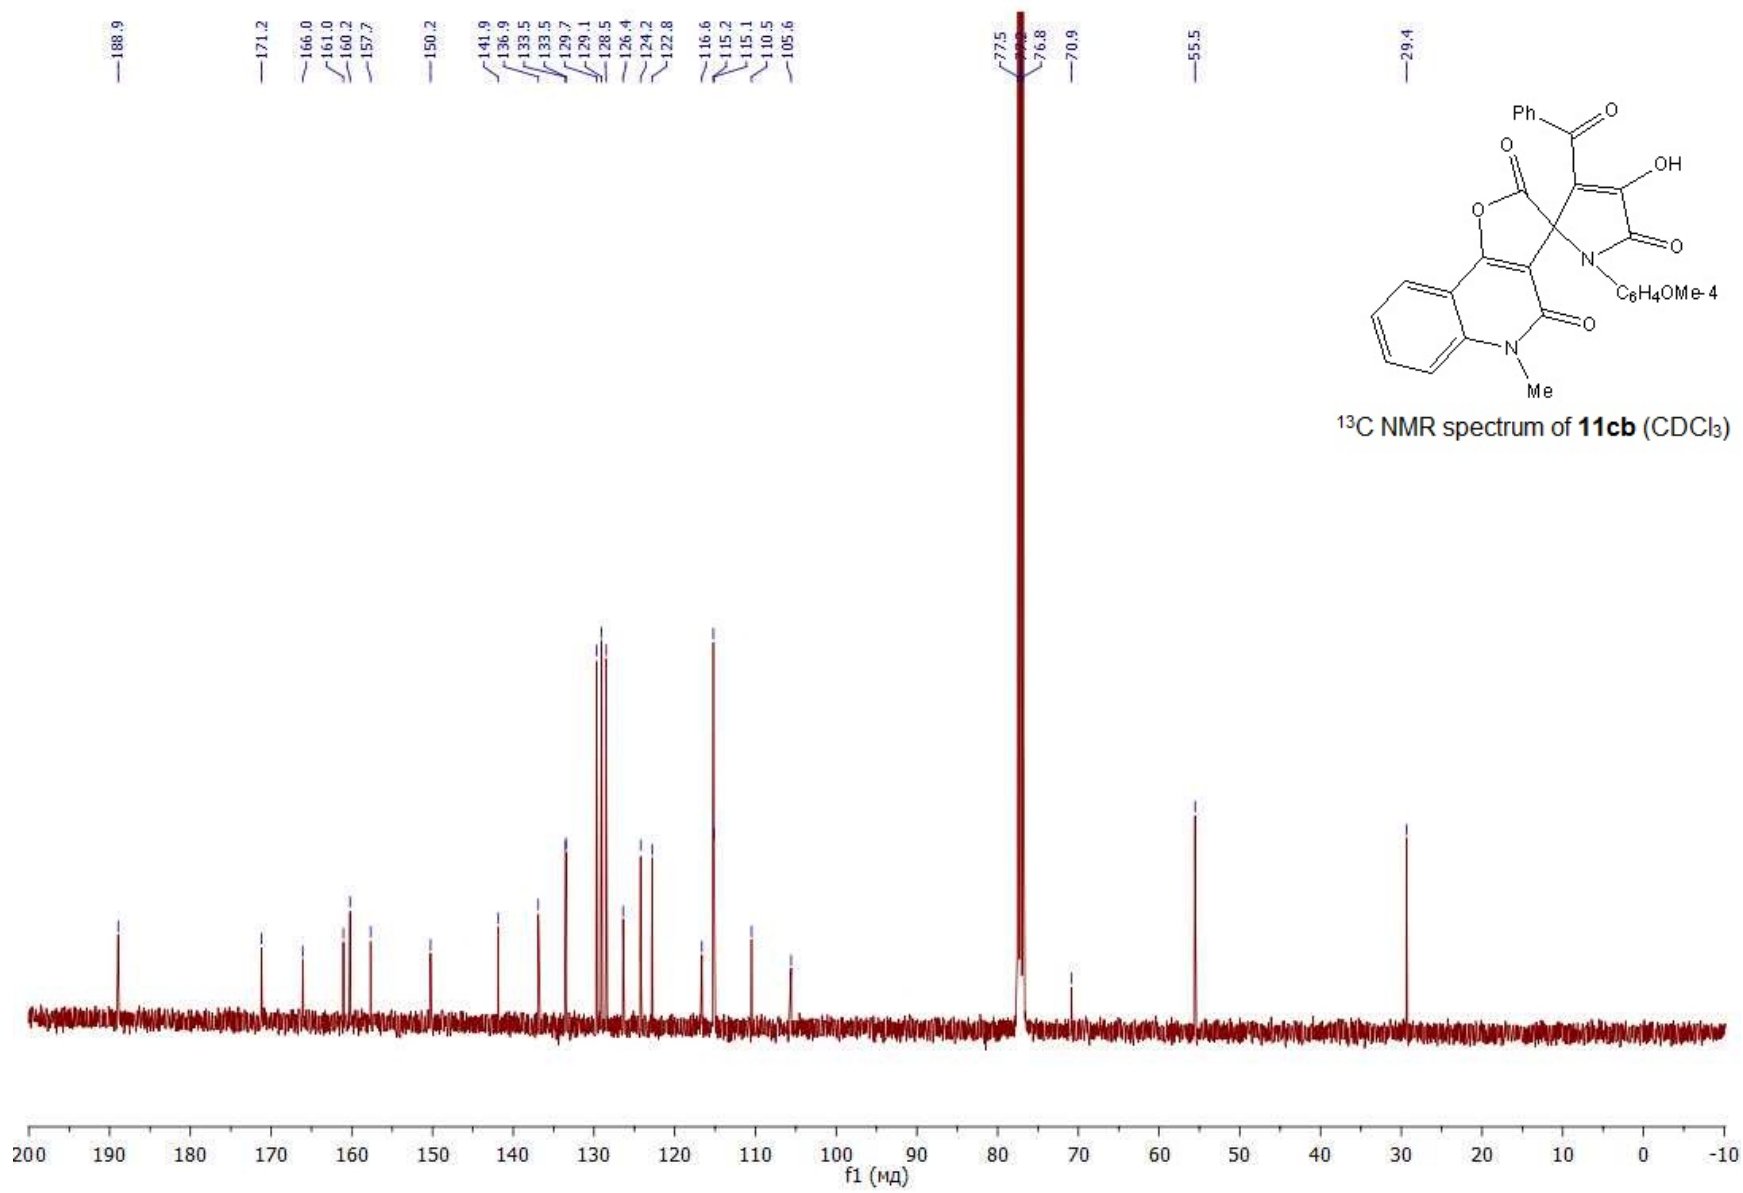

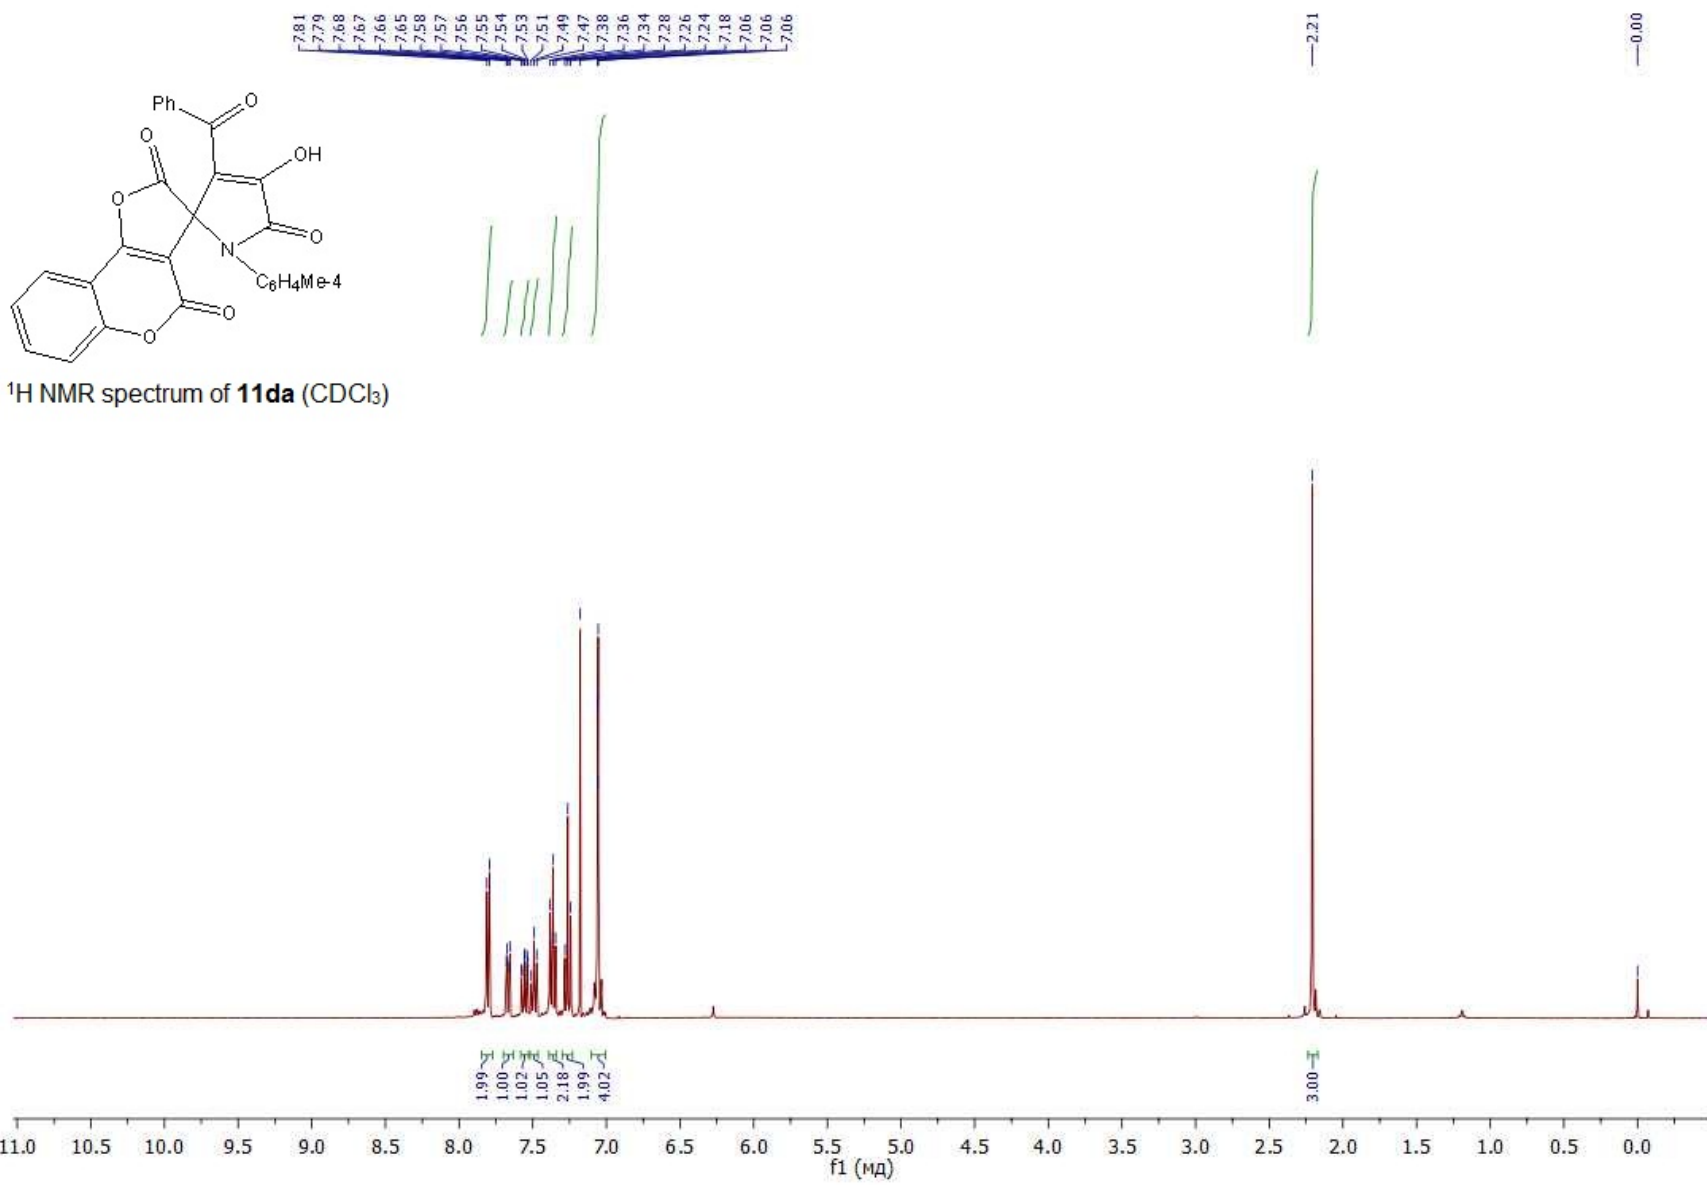



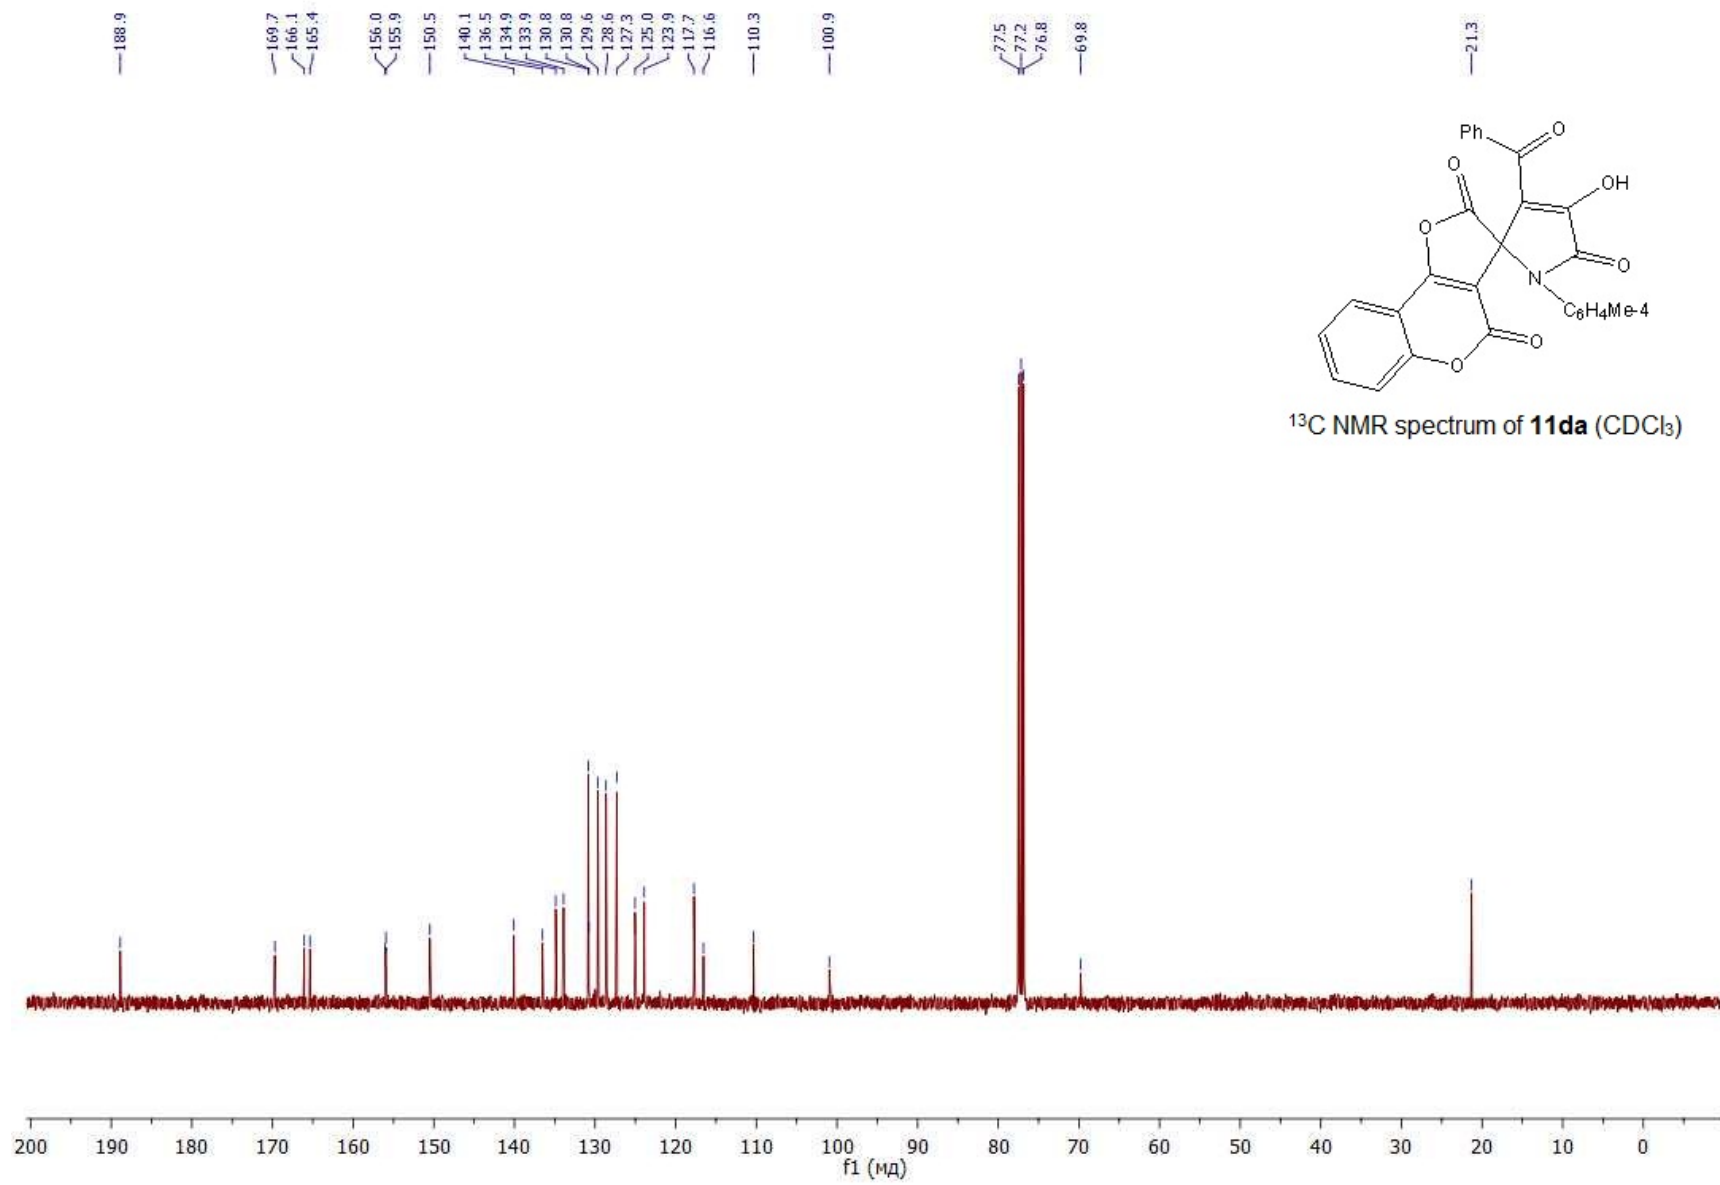

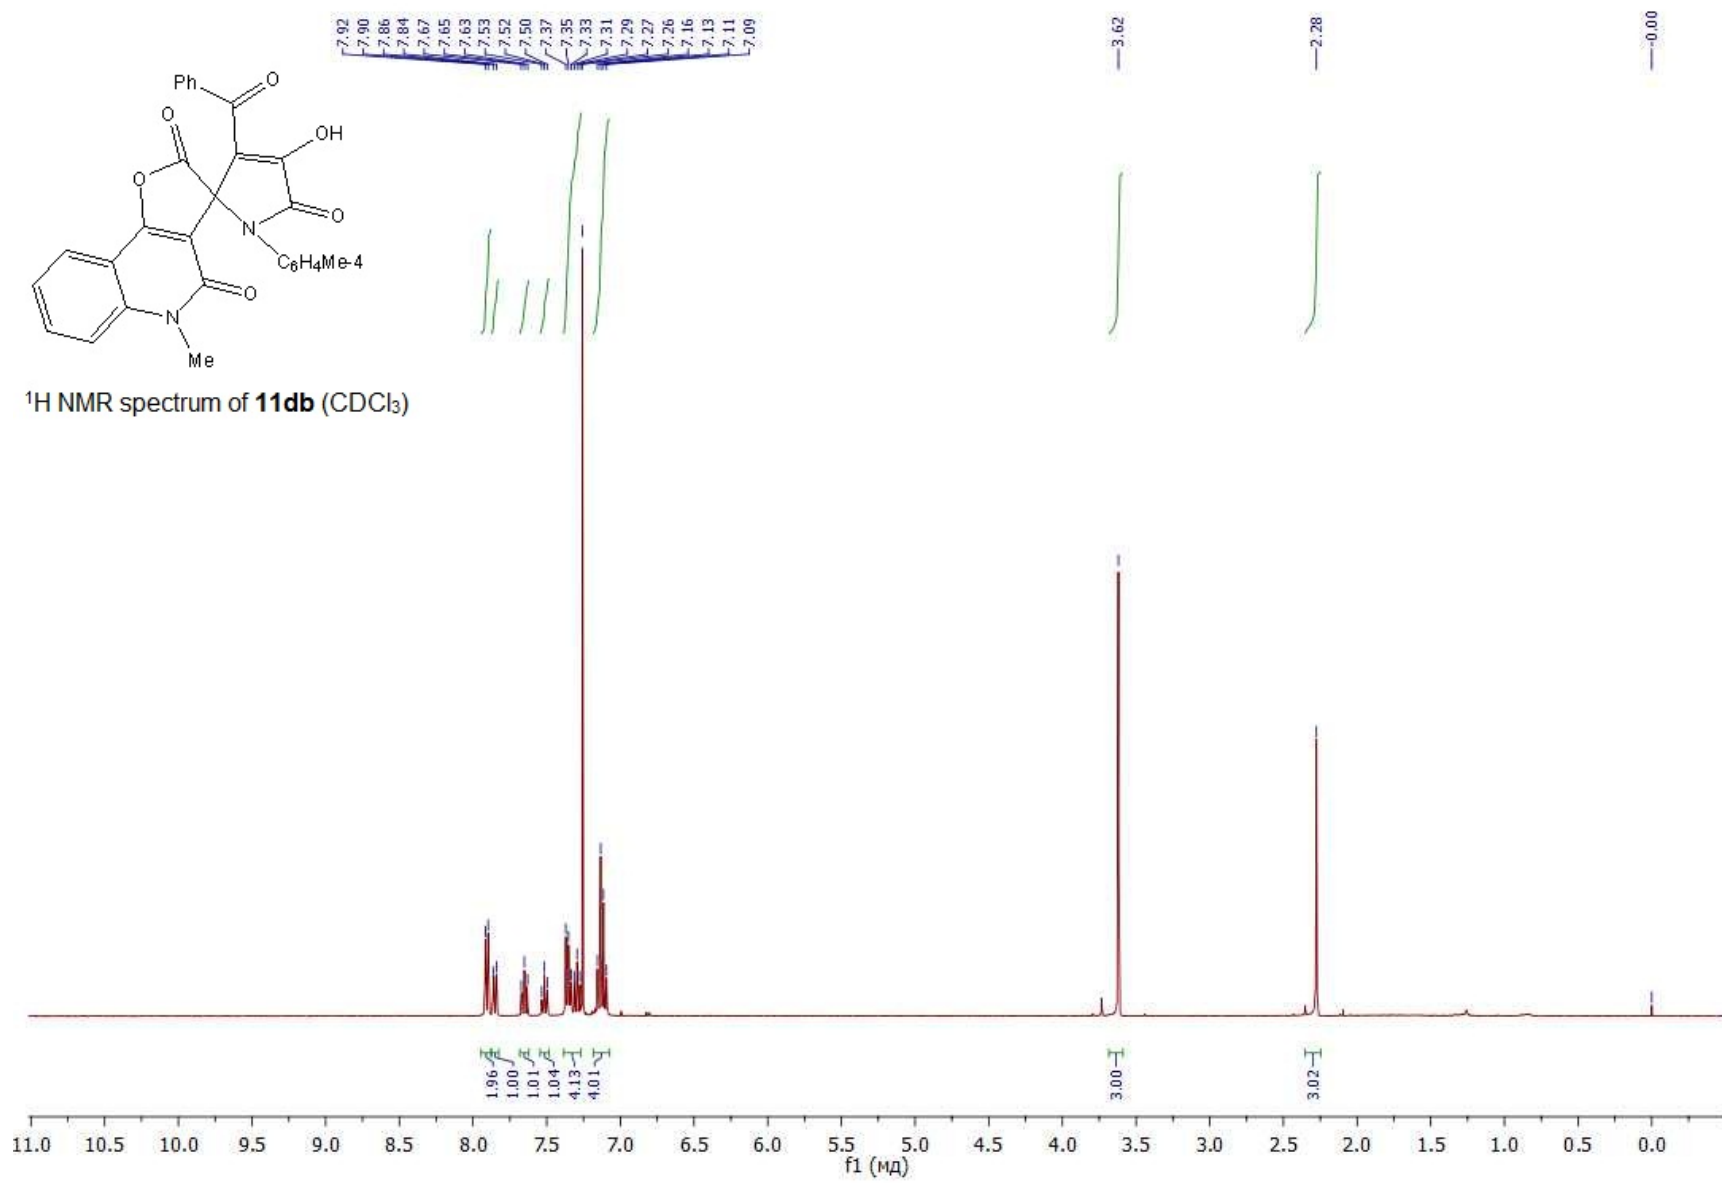

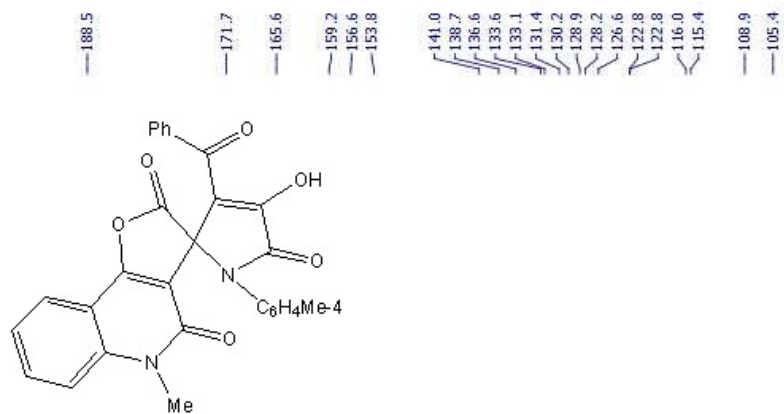

$^{13}\text{C}$  NMR spectrum of **11db** (DMSO- $d_6$ )

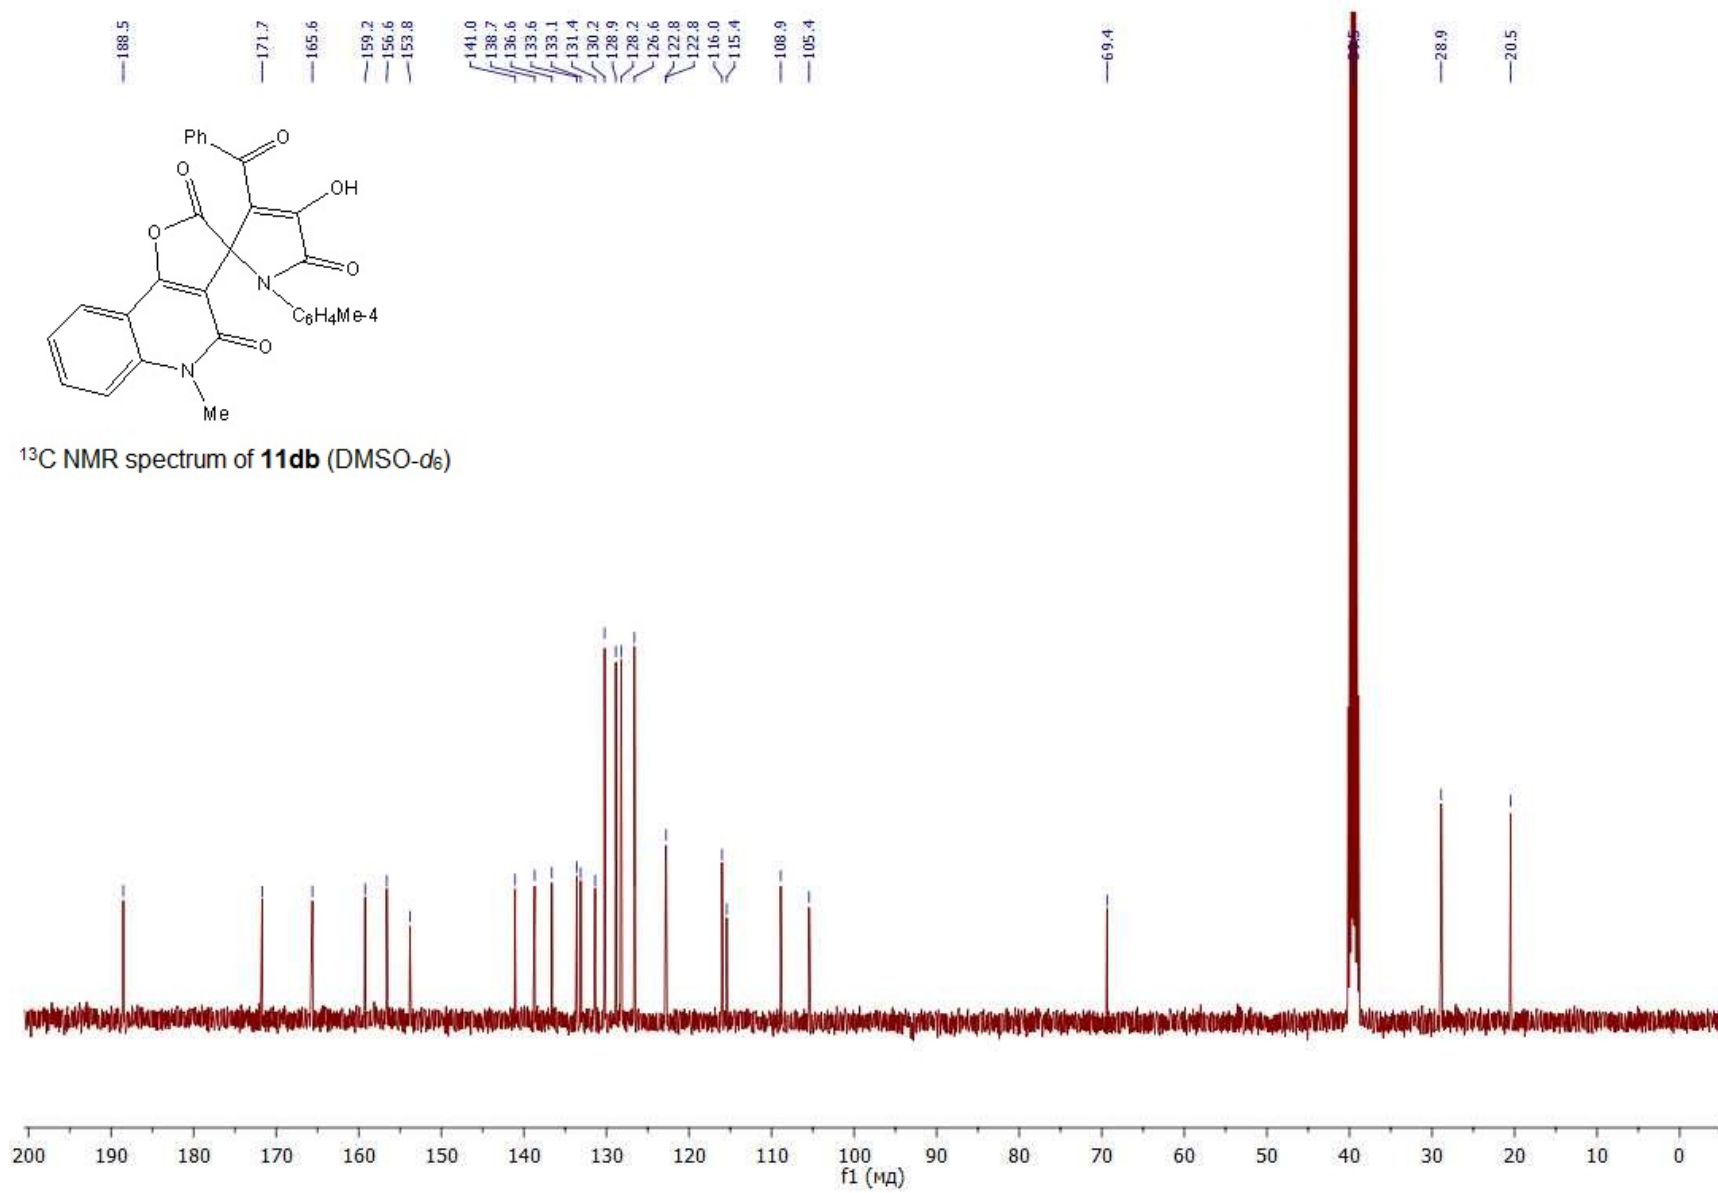

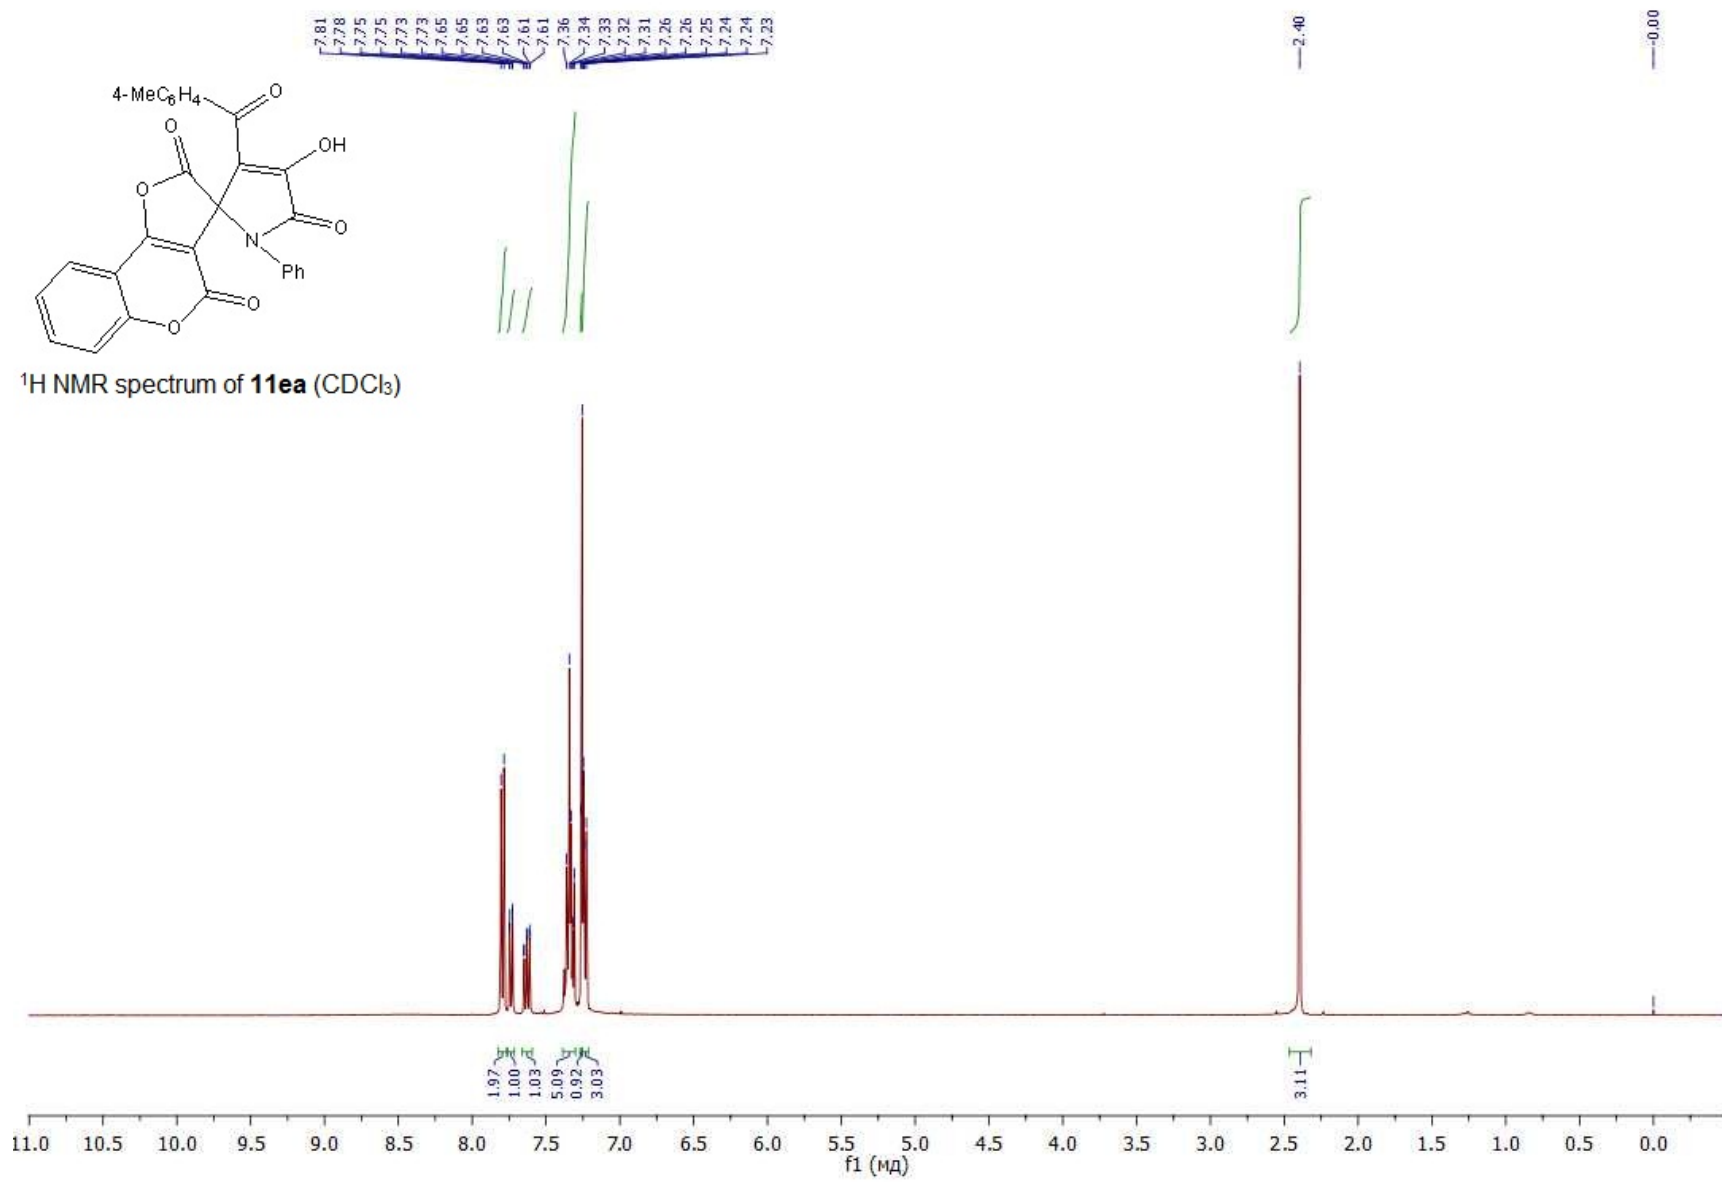

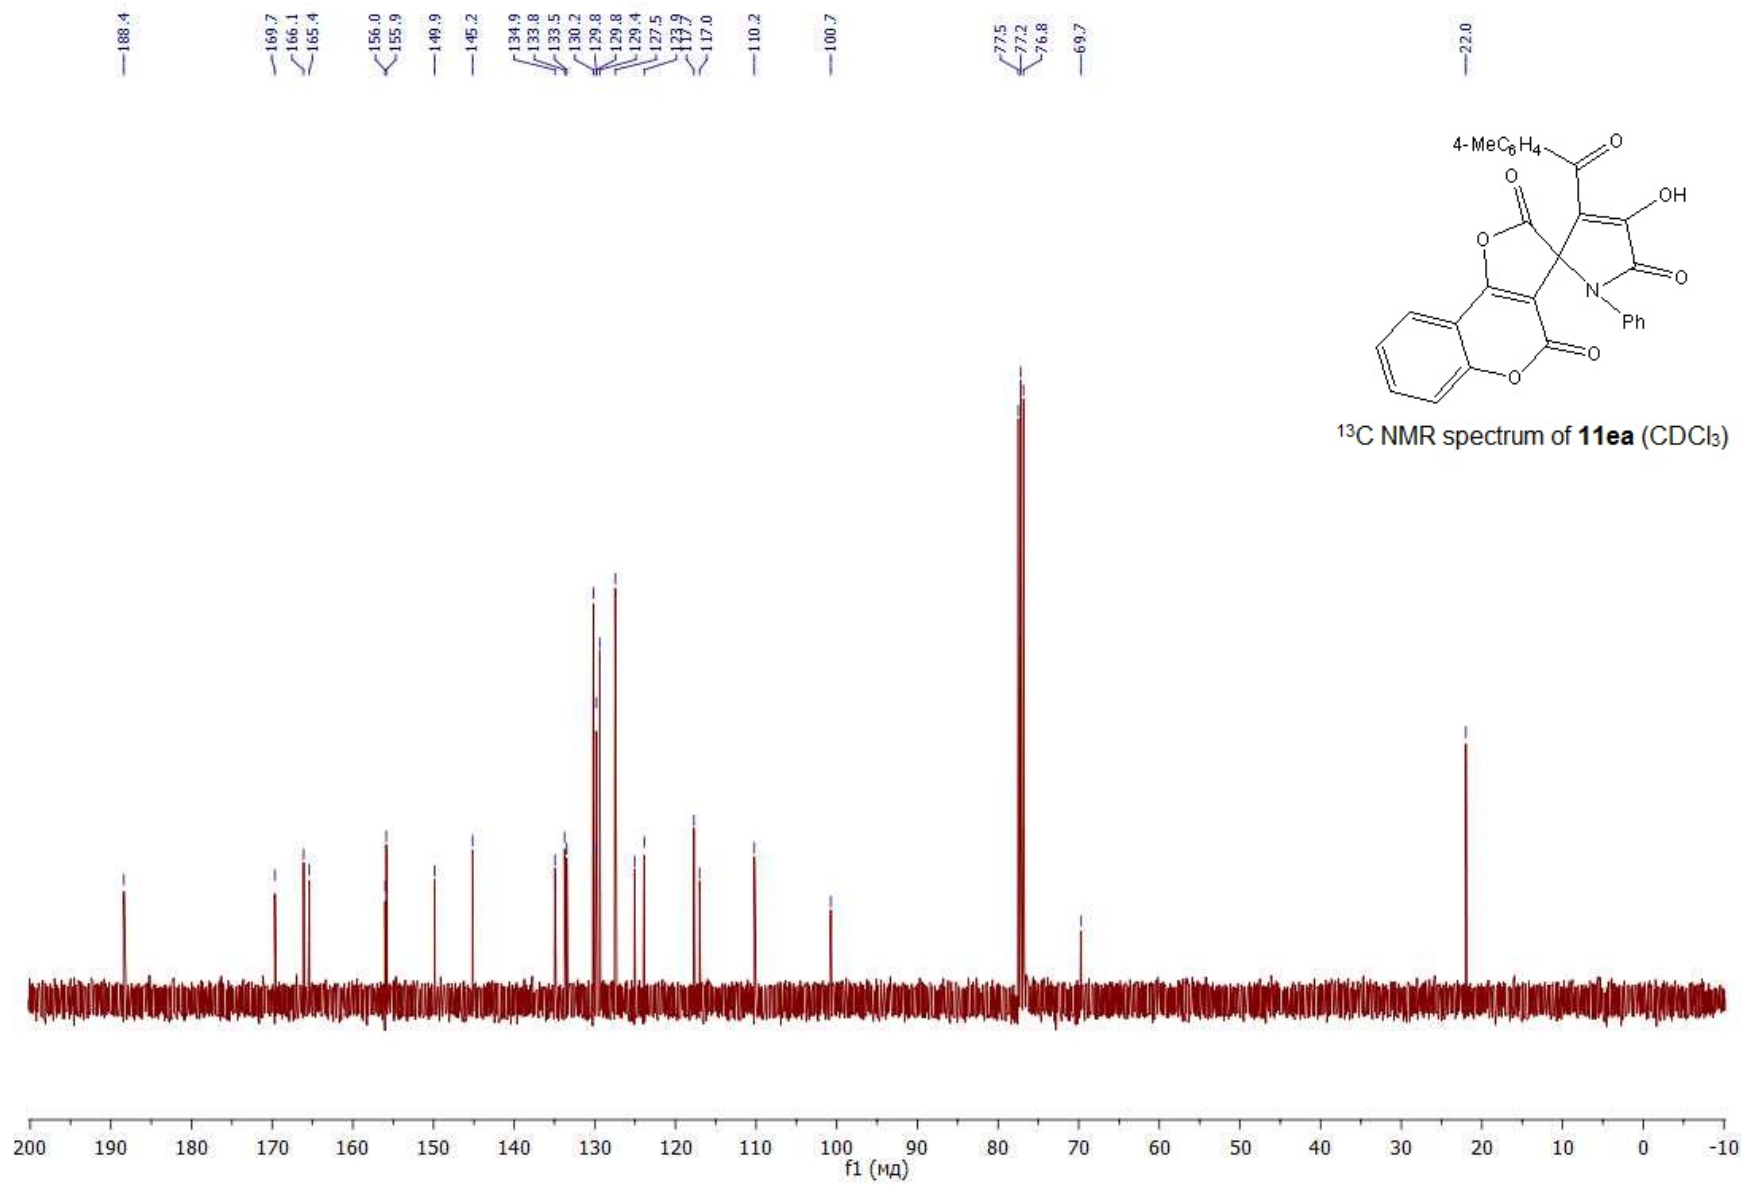

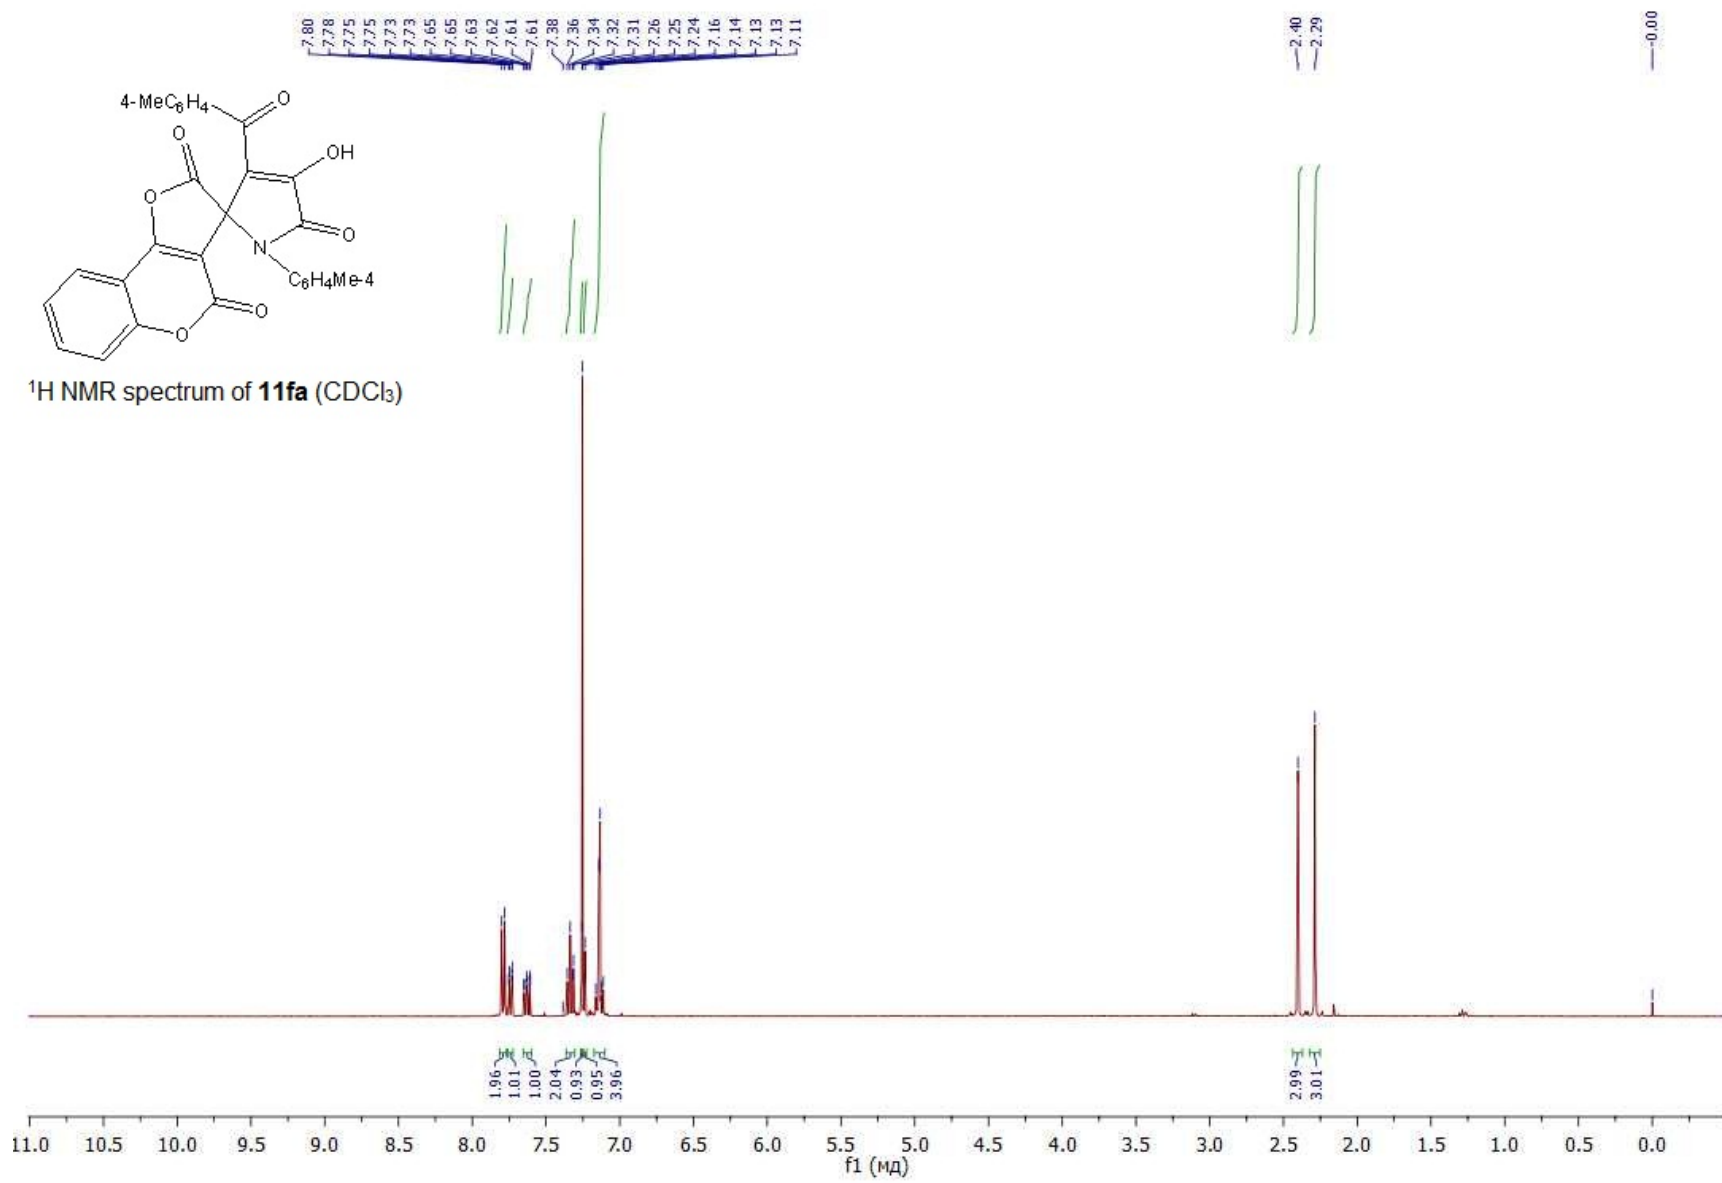

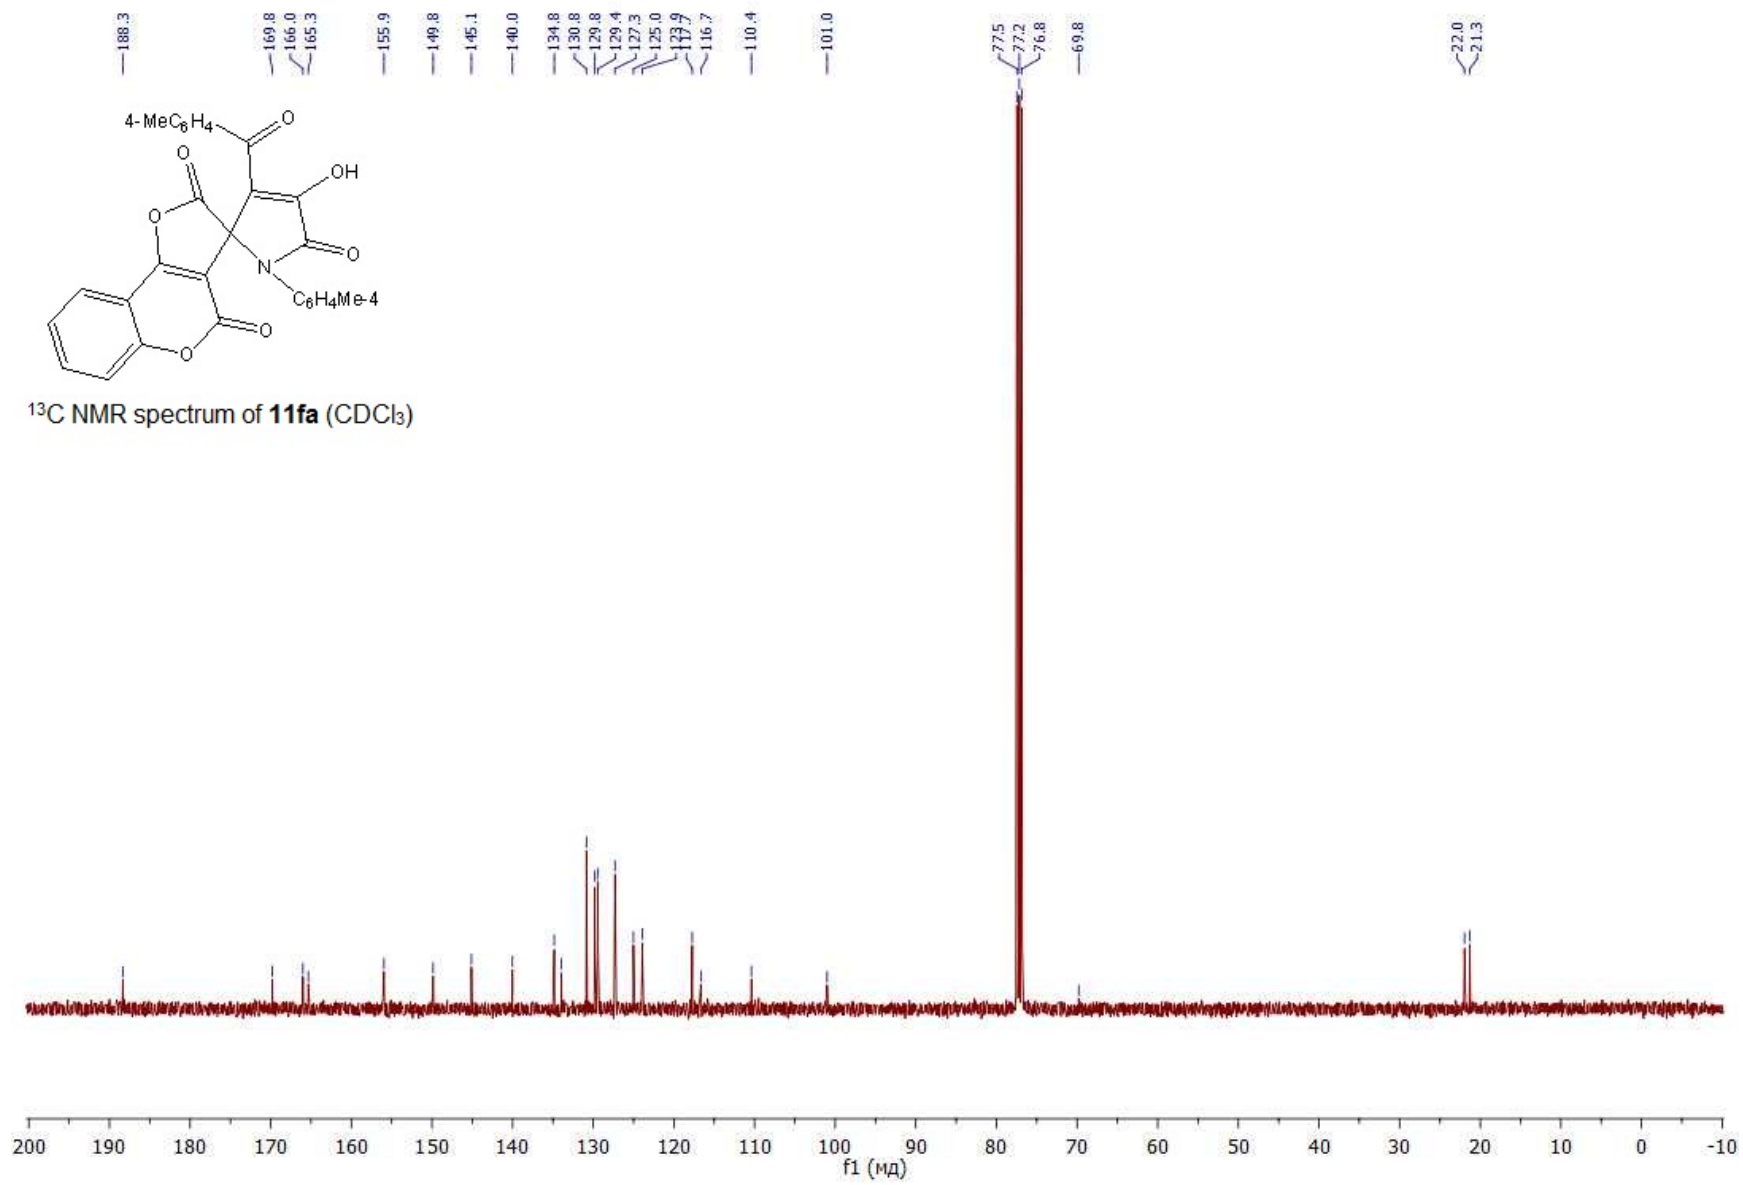

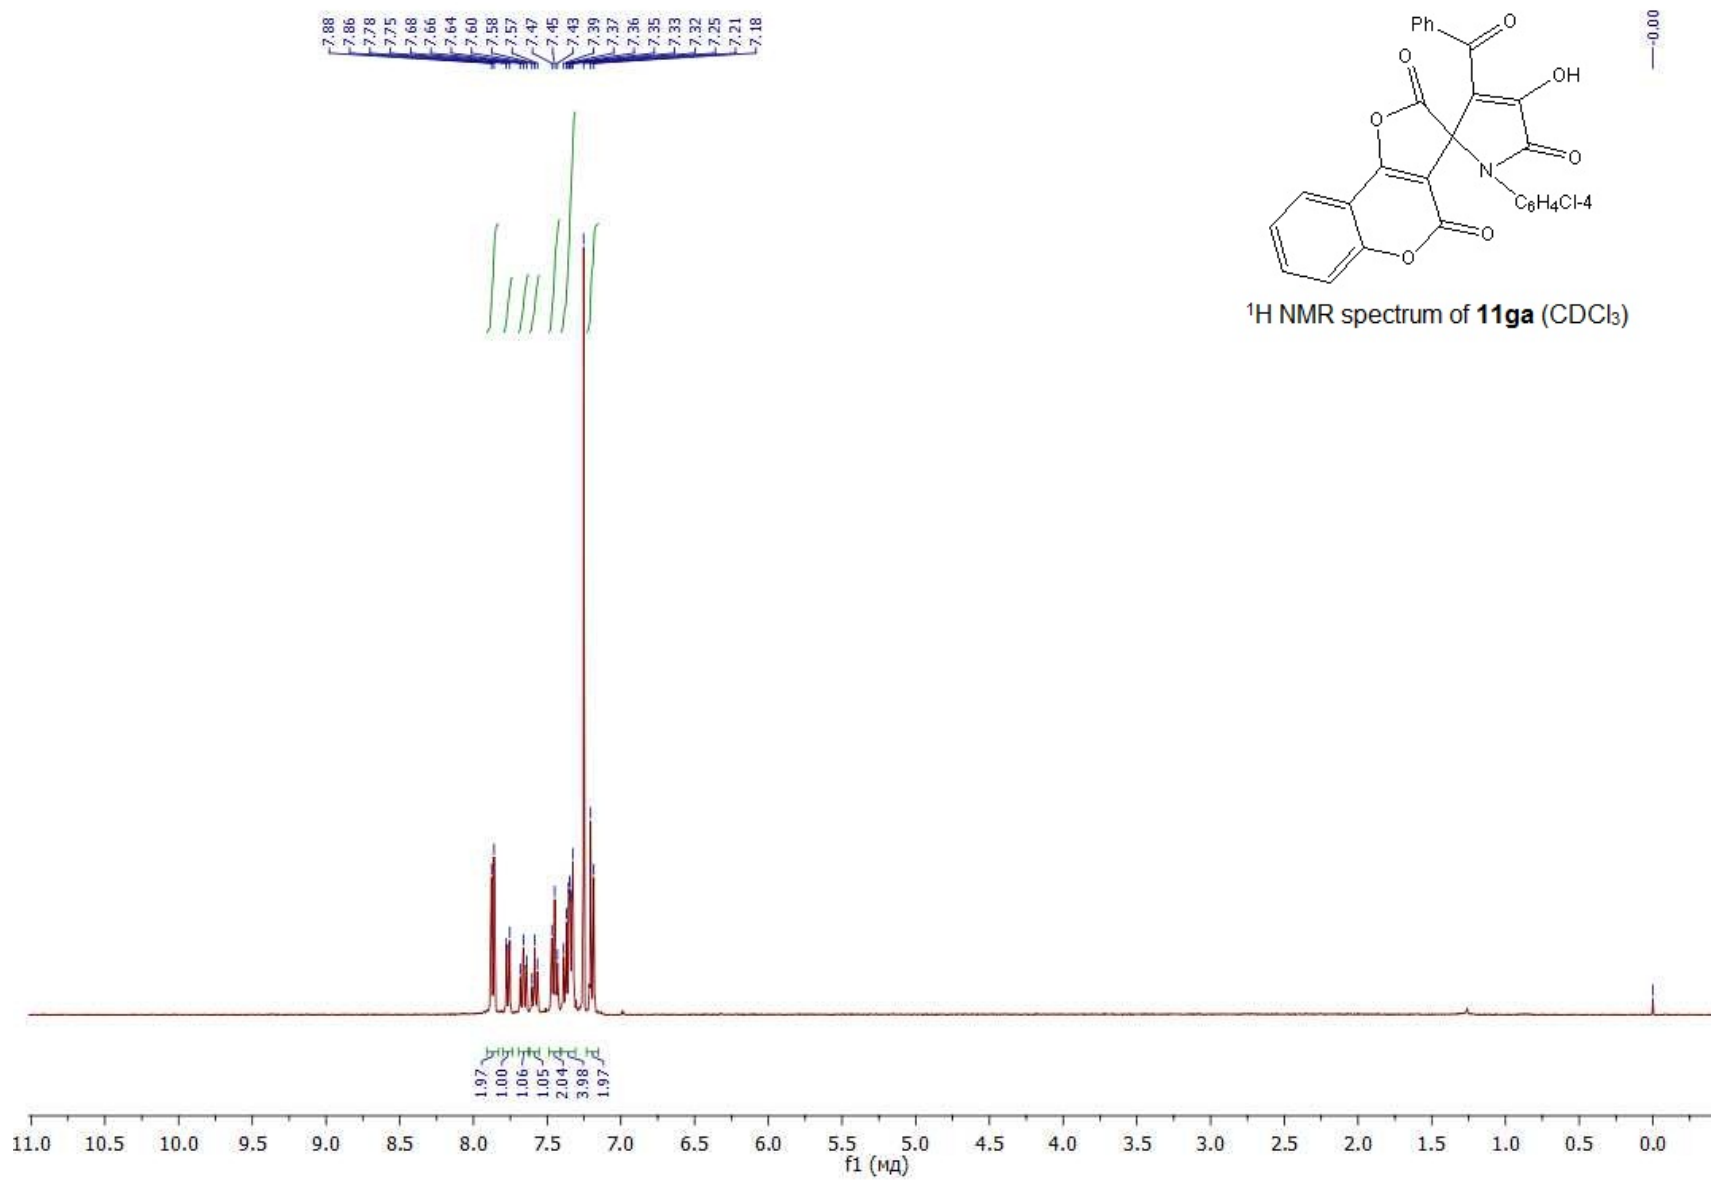



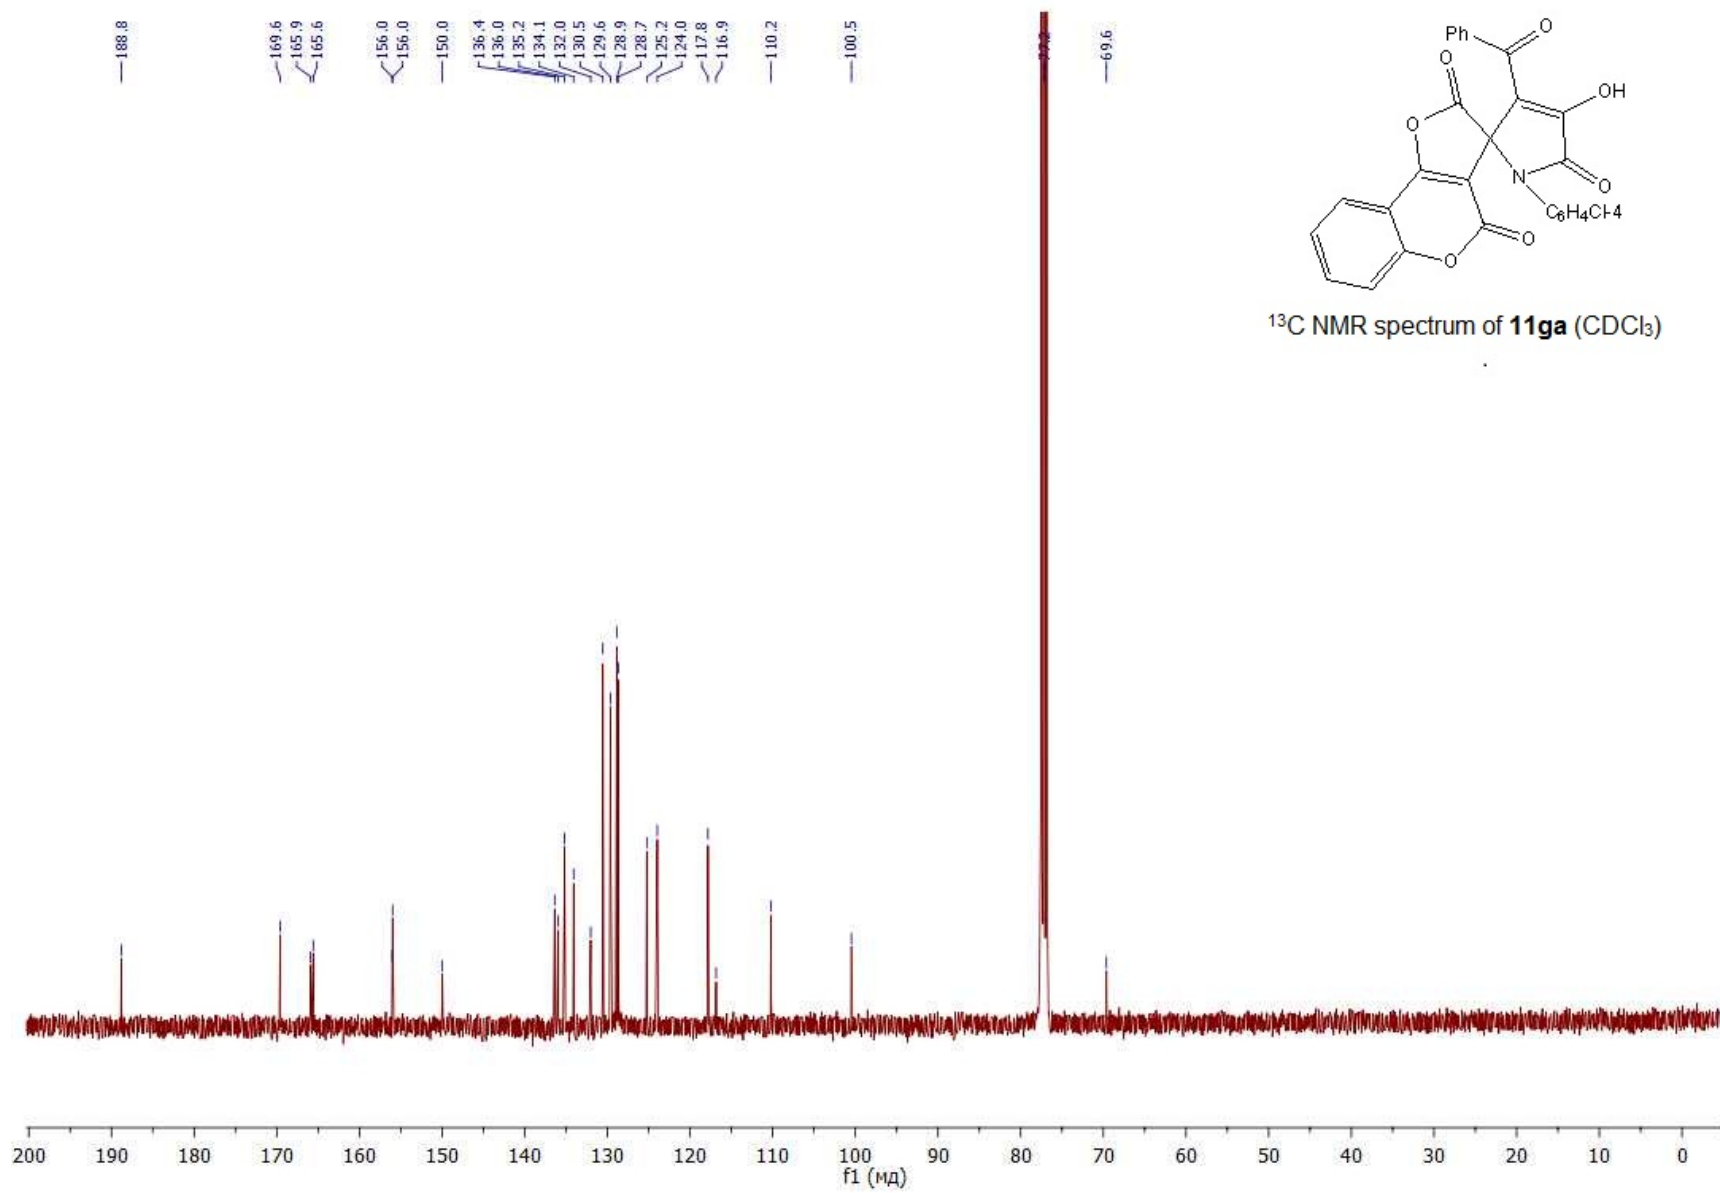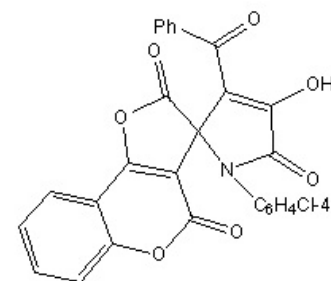

<sup>13</sup>C NMR spectrum of **11ga** (CDCl<sub>3</sub>)

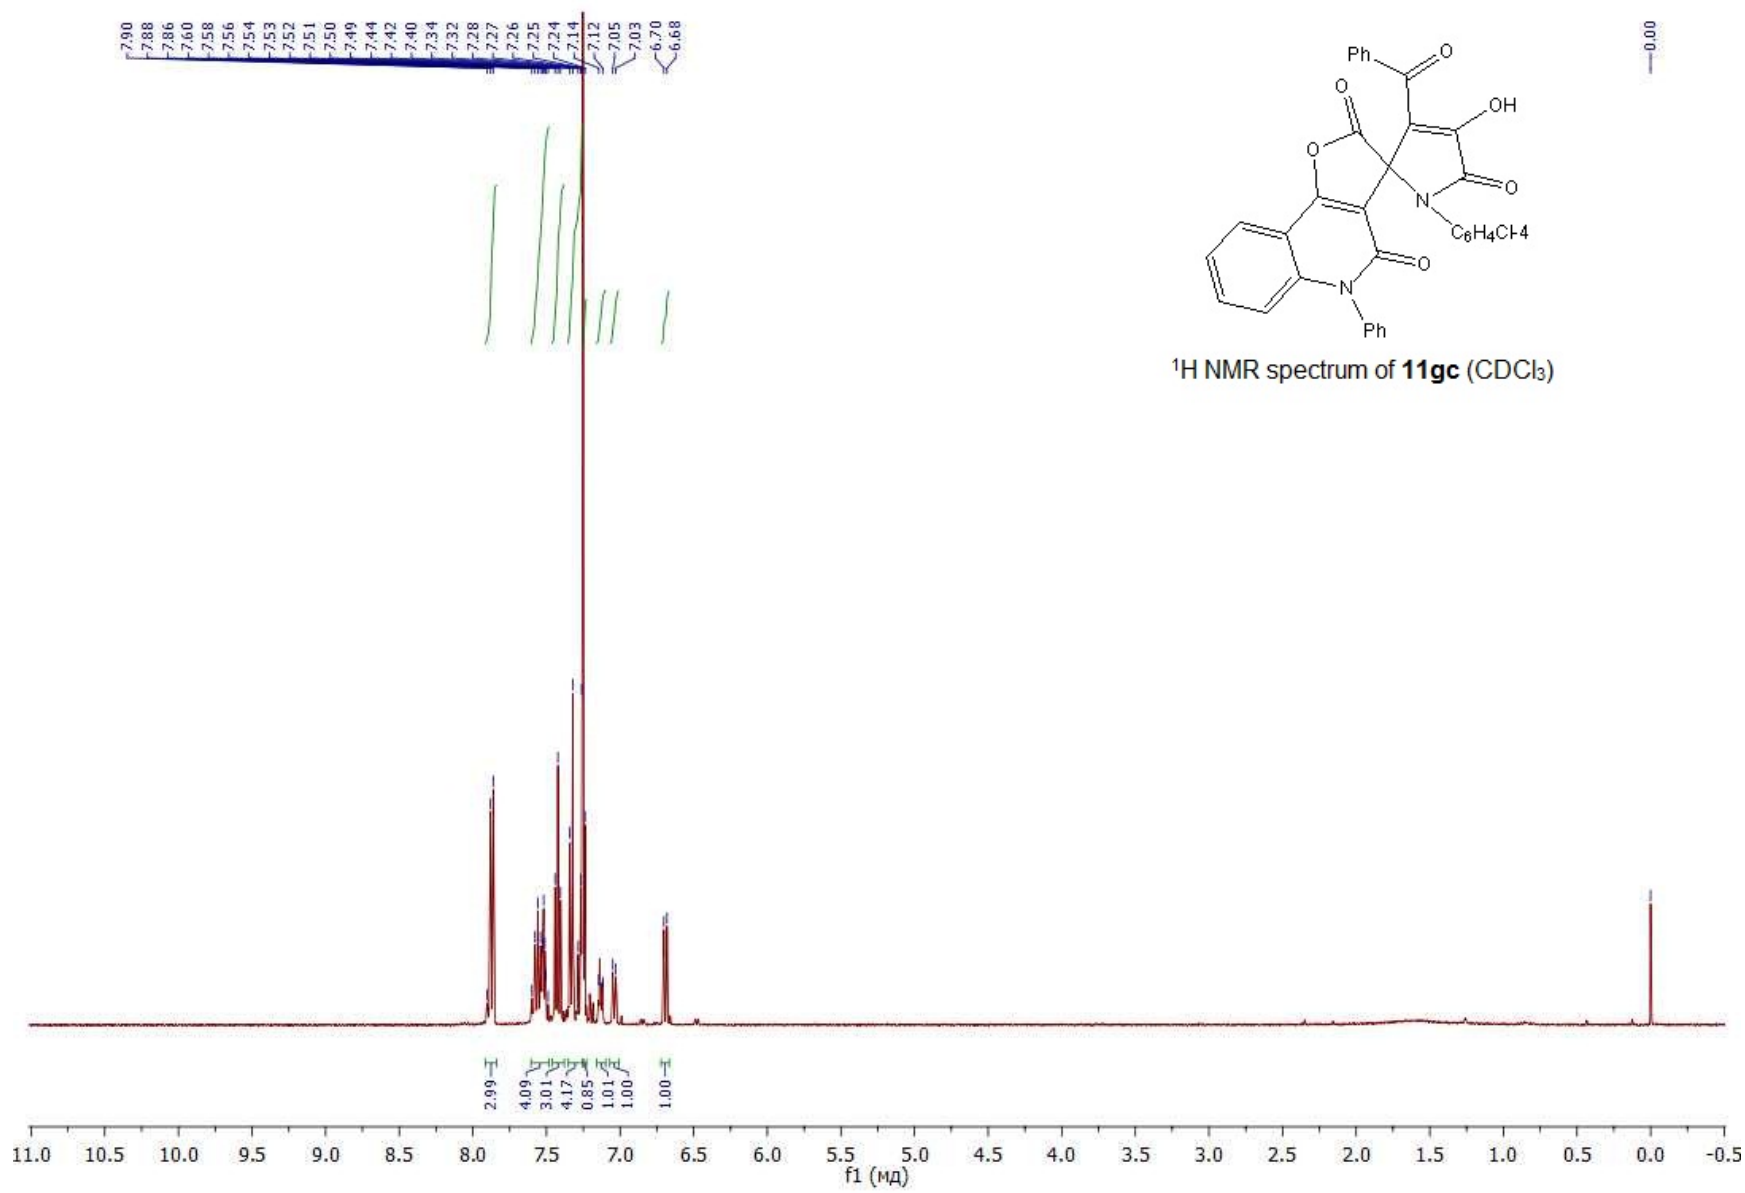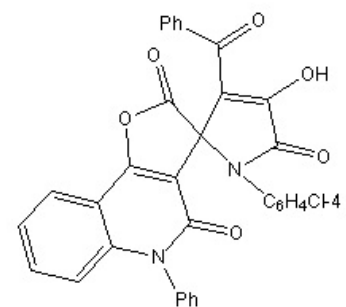

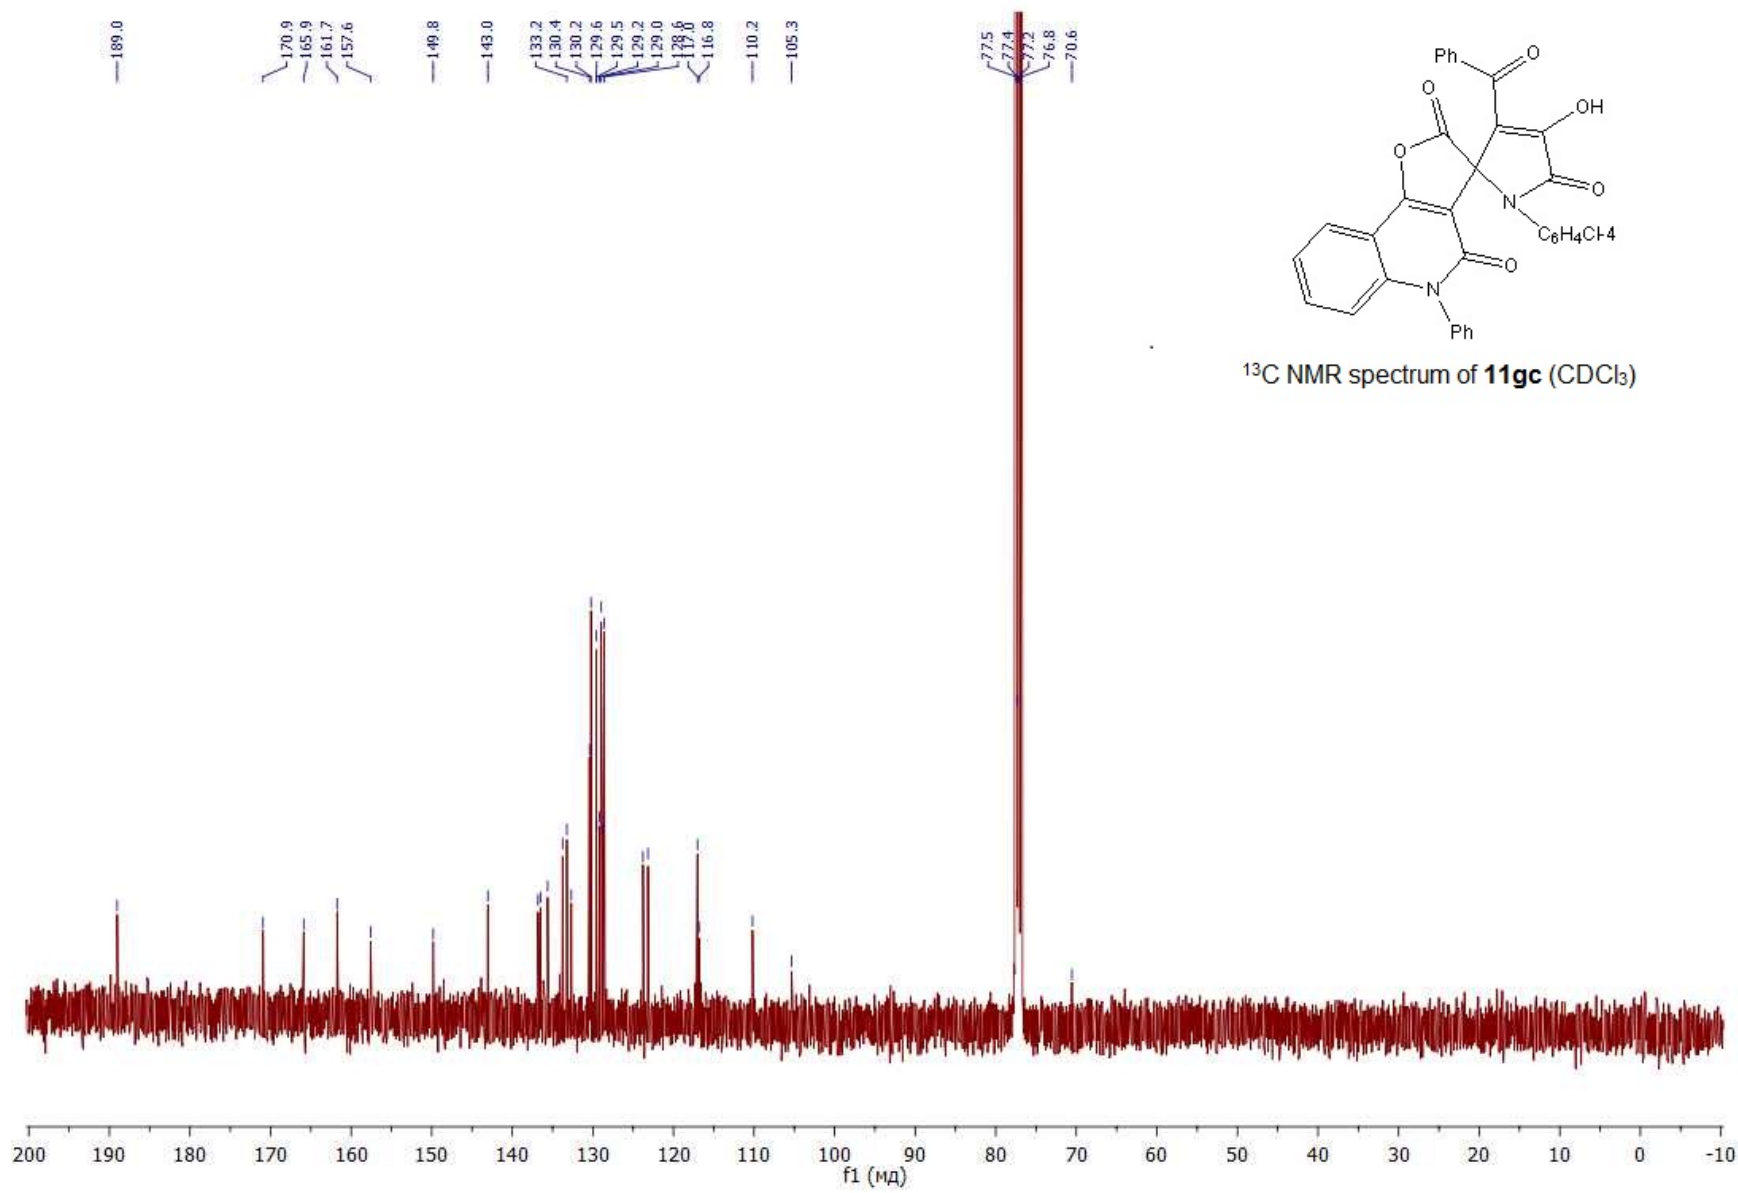

7.88  
7.86  
7.78  
7.75  
7.68  
7.66  
7.64  
7.60  
7.58  
7.56  
7.50  
7.48  
7.46  
7.44  
7.39  
7.37  
7.35  
7.33  
7.25  
7.14  
7.11

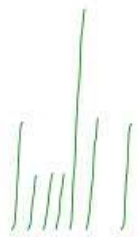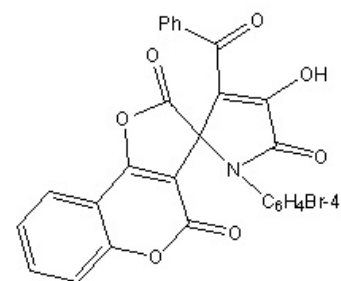

<sup>1</sup>H NMR spectrum of **11ha** (CDCl<sub>3</sub>)

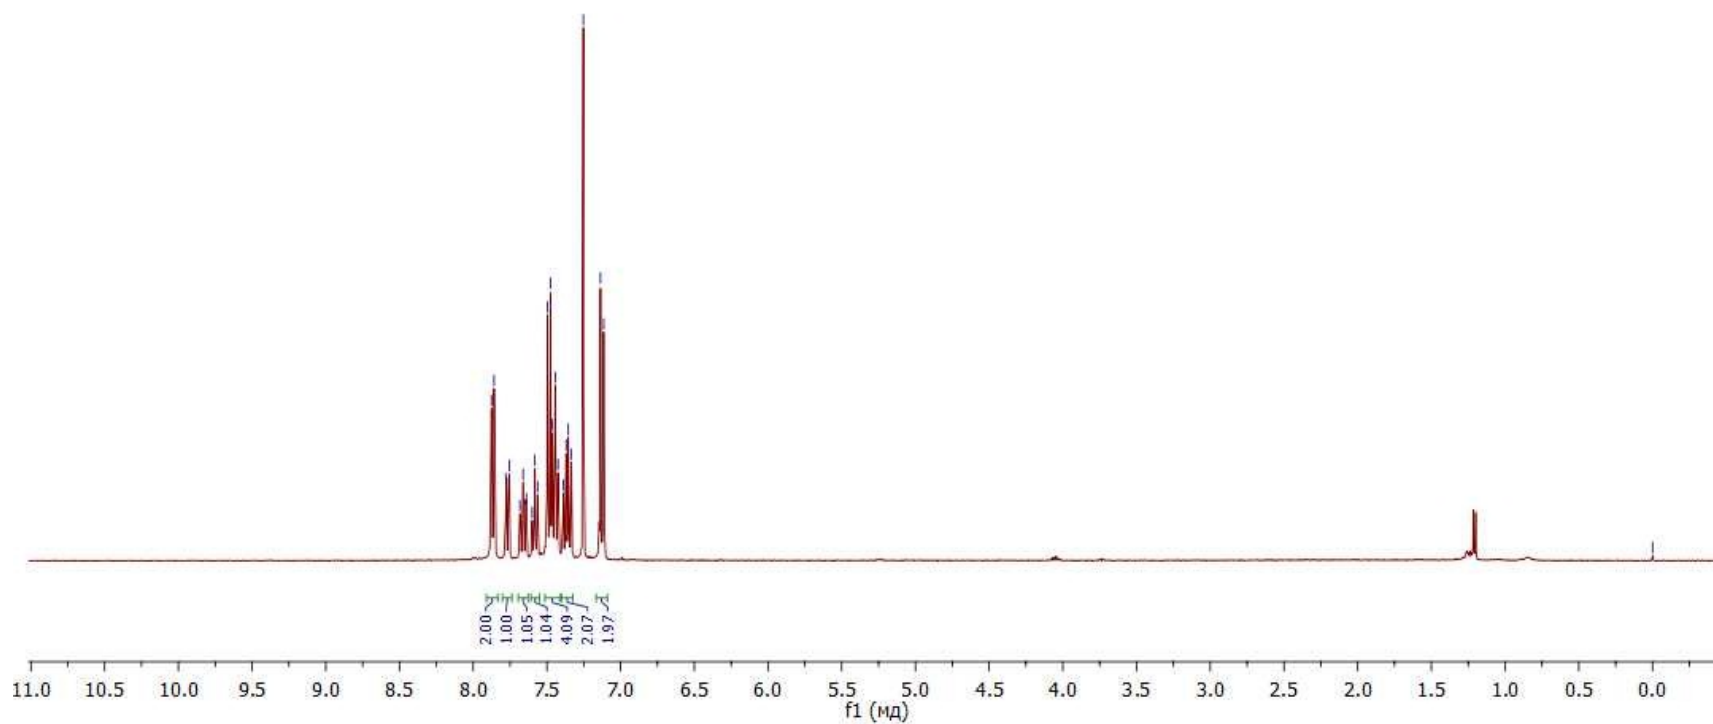

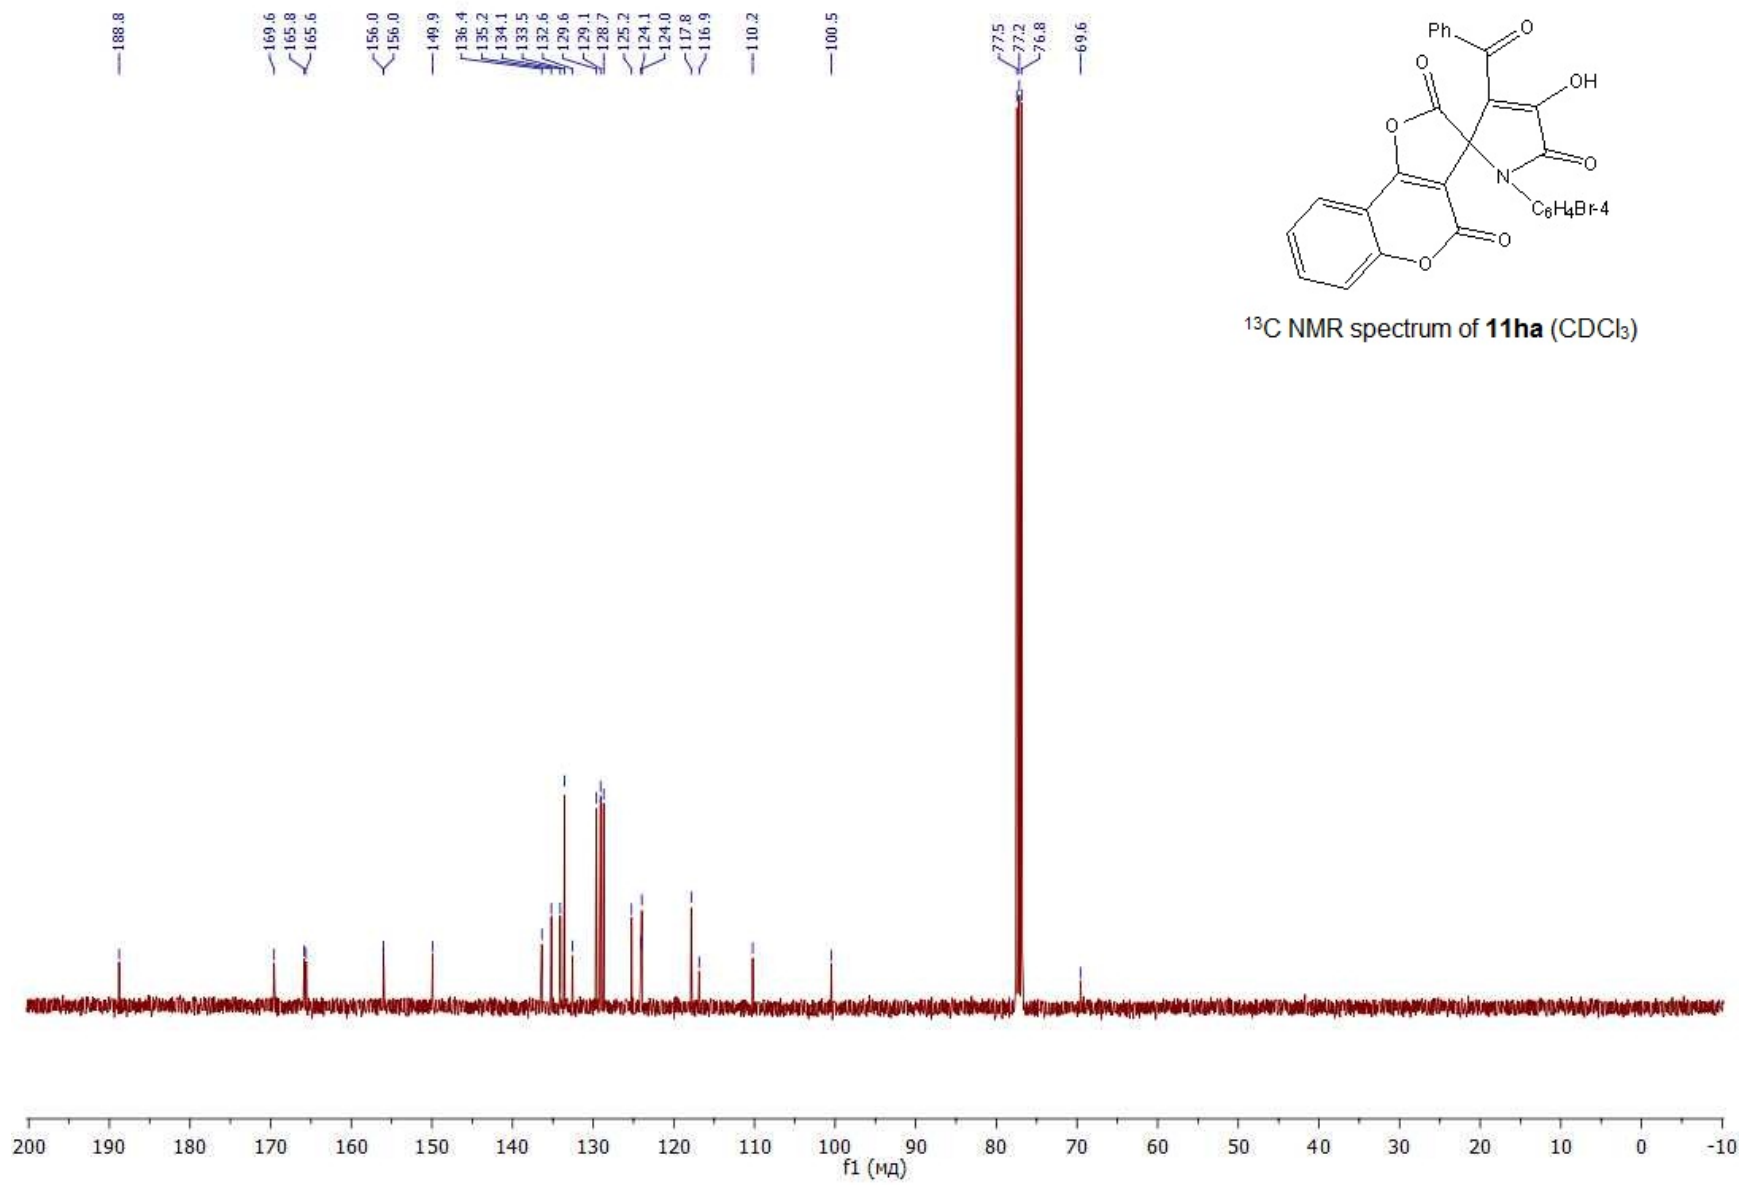

<sup>13</sup>C NMR spectrum of **11ha** (CDCl<sub>3</sub>)

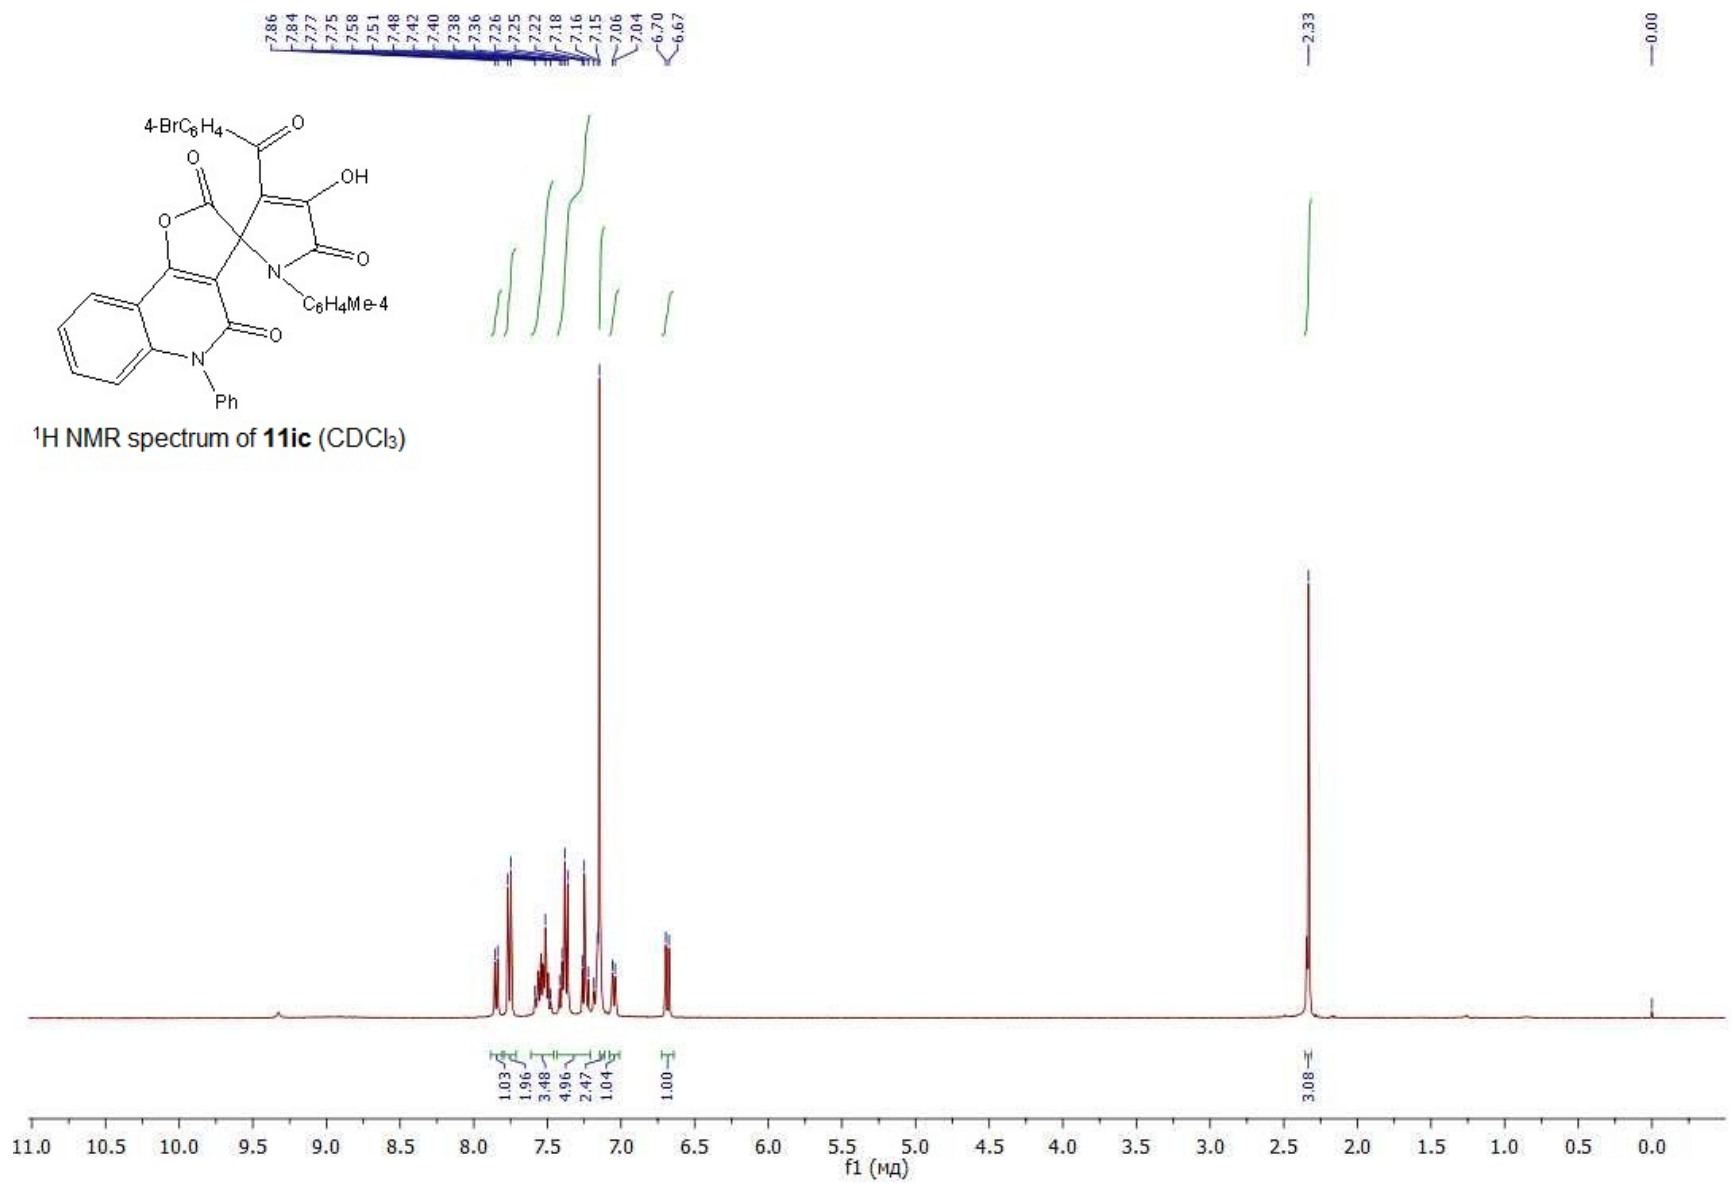

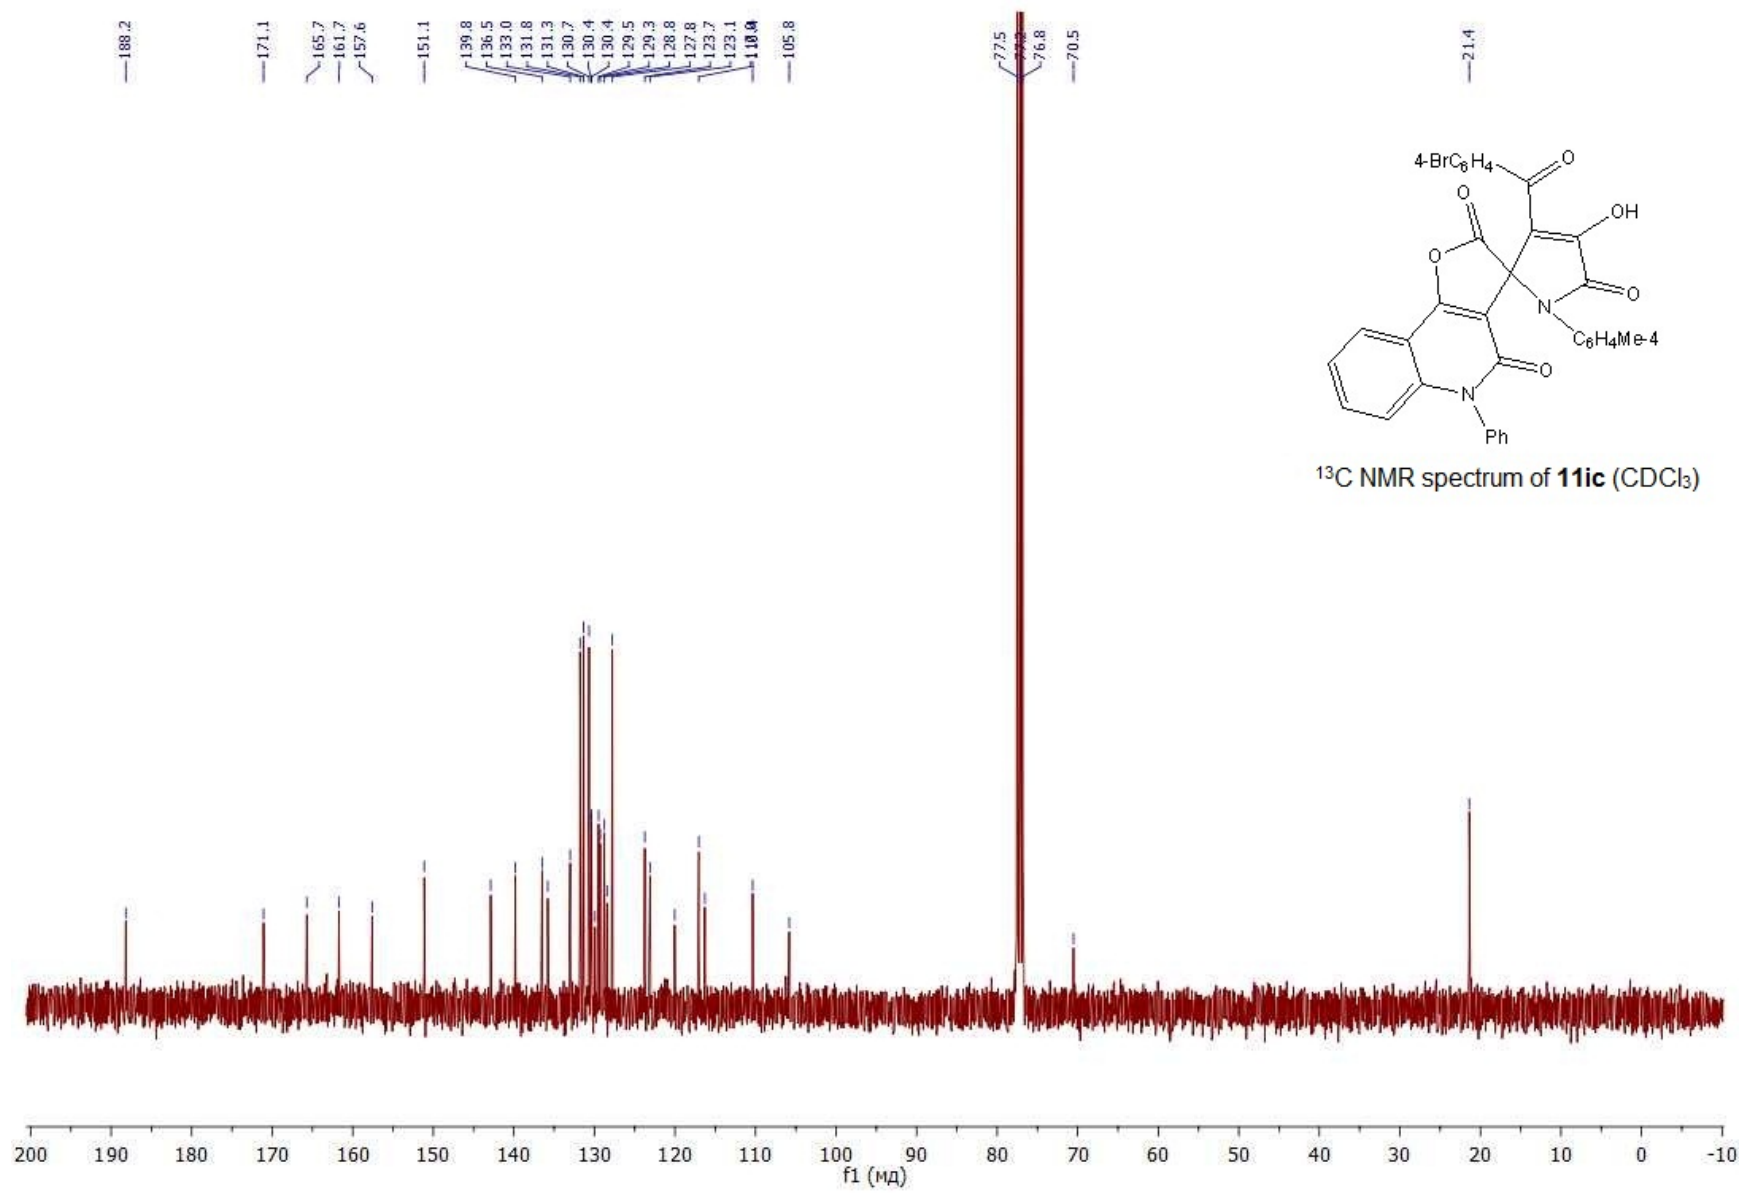

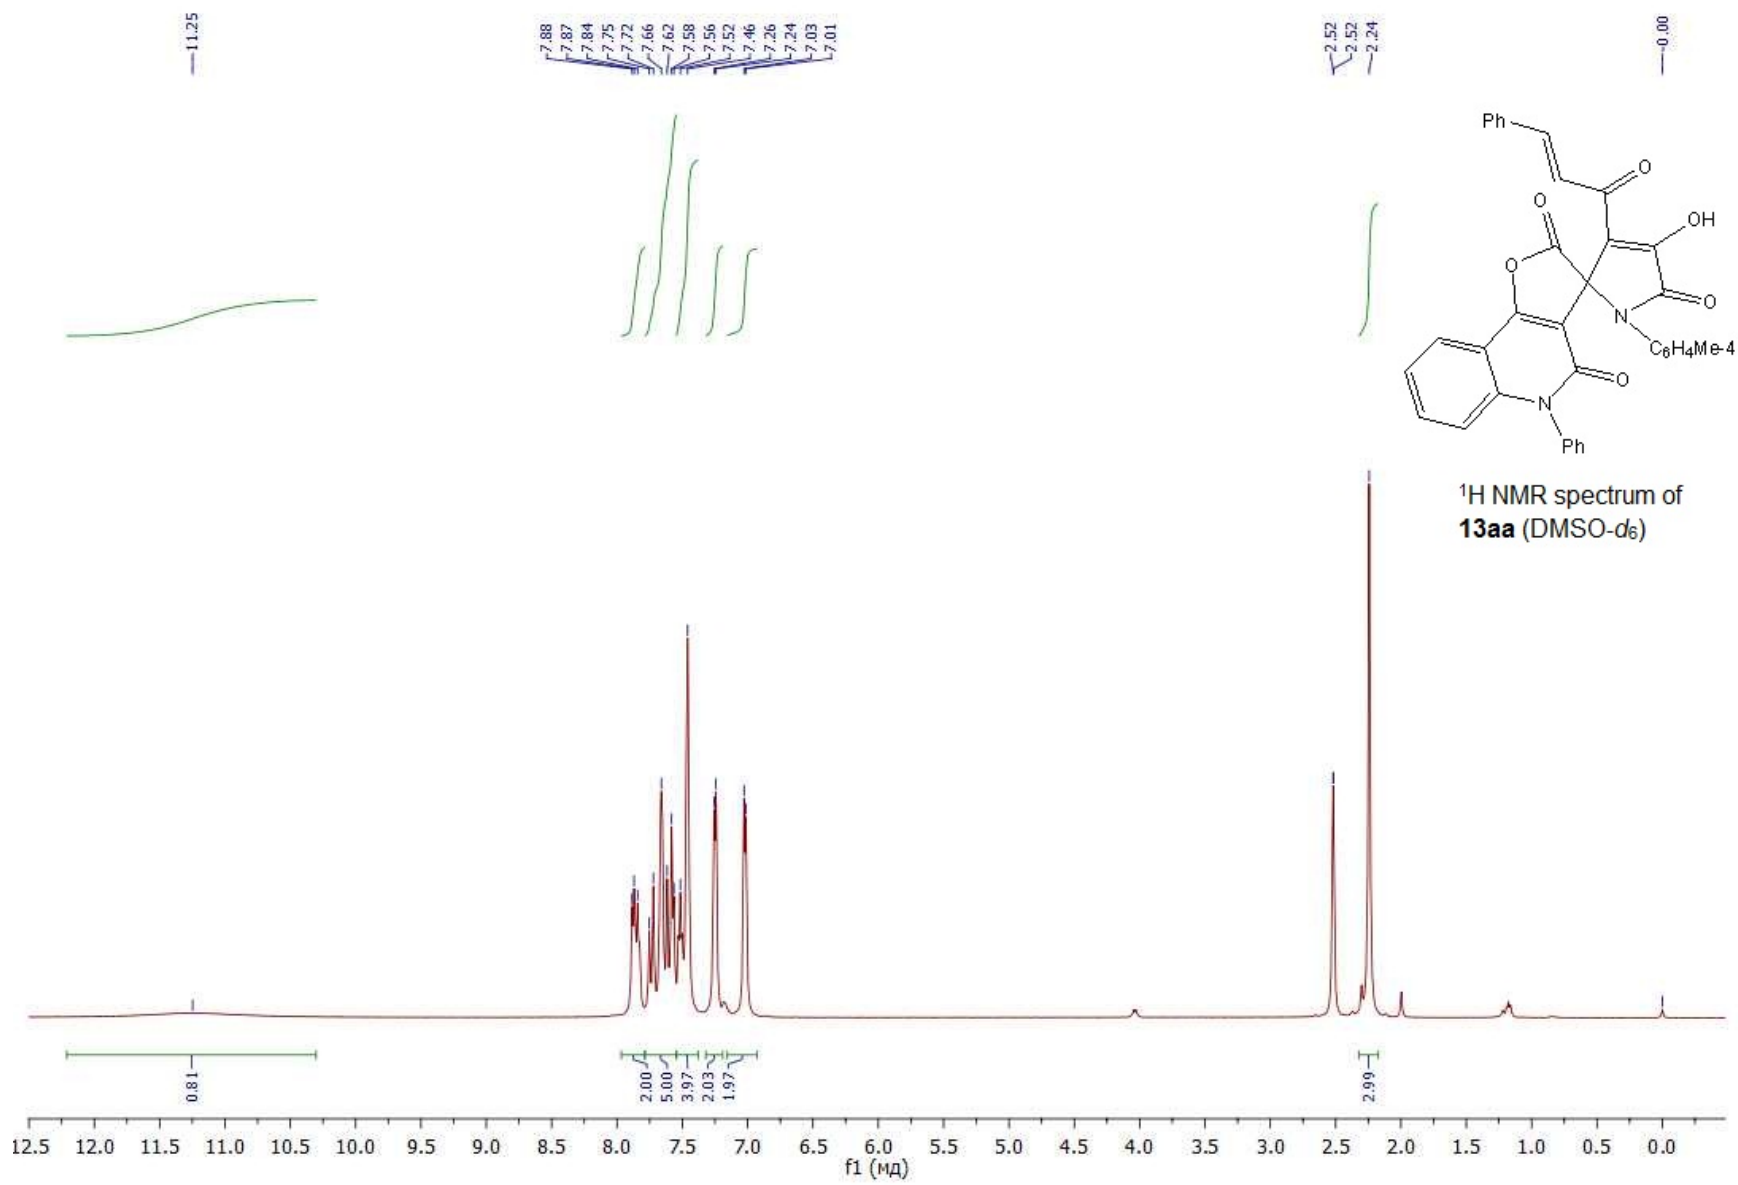



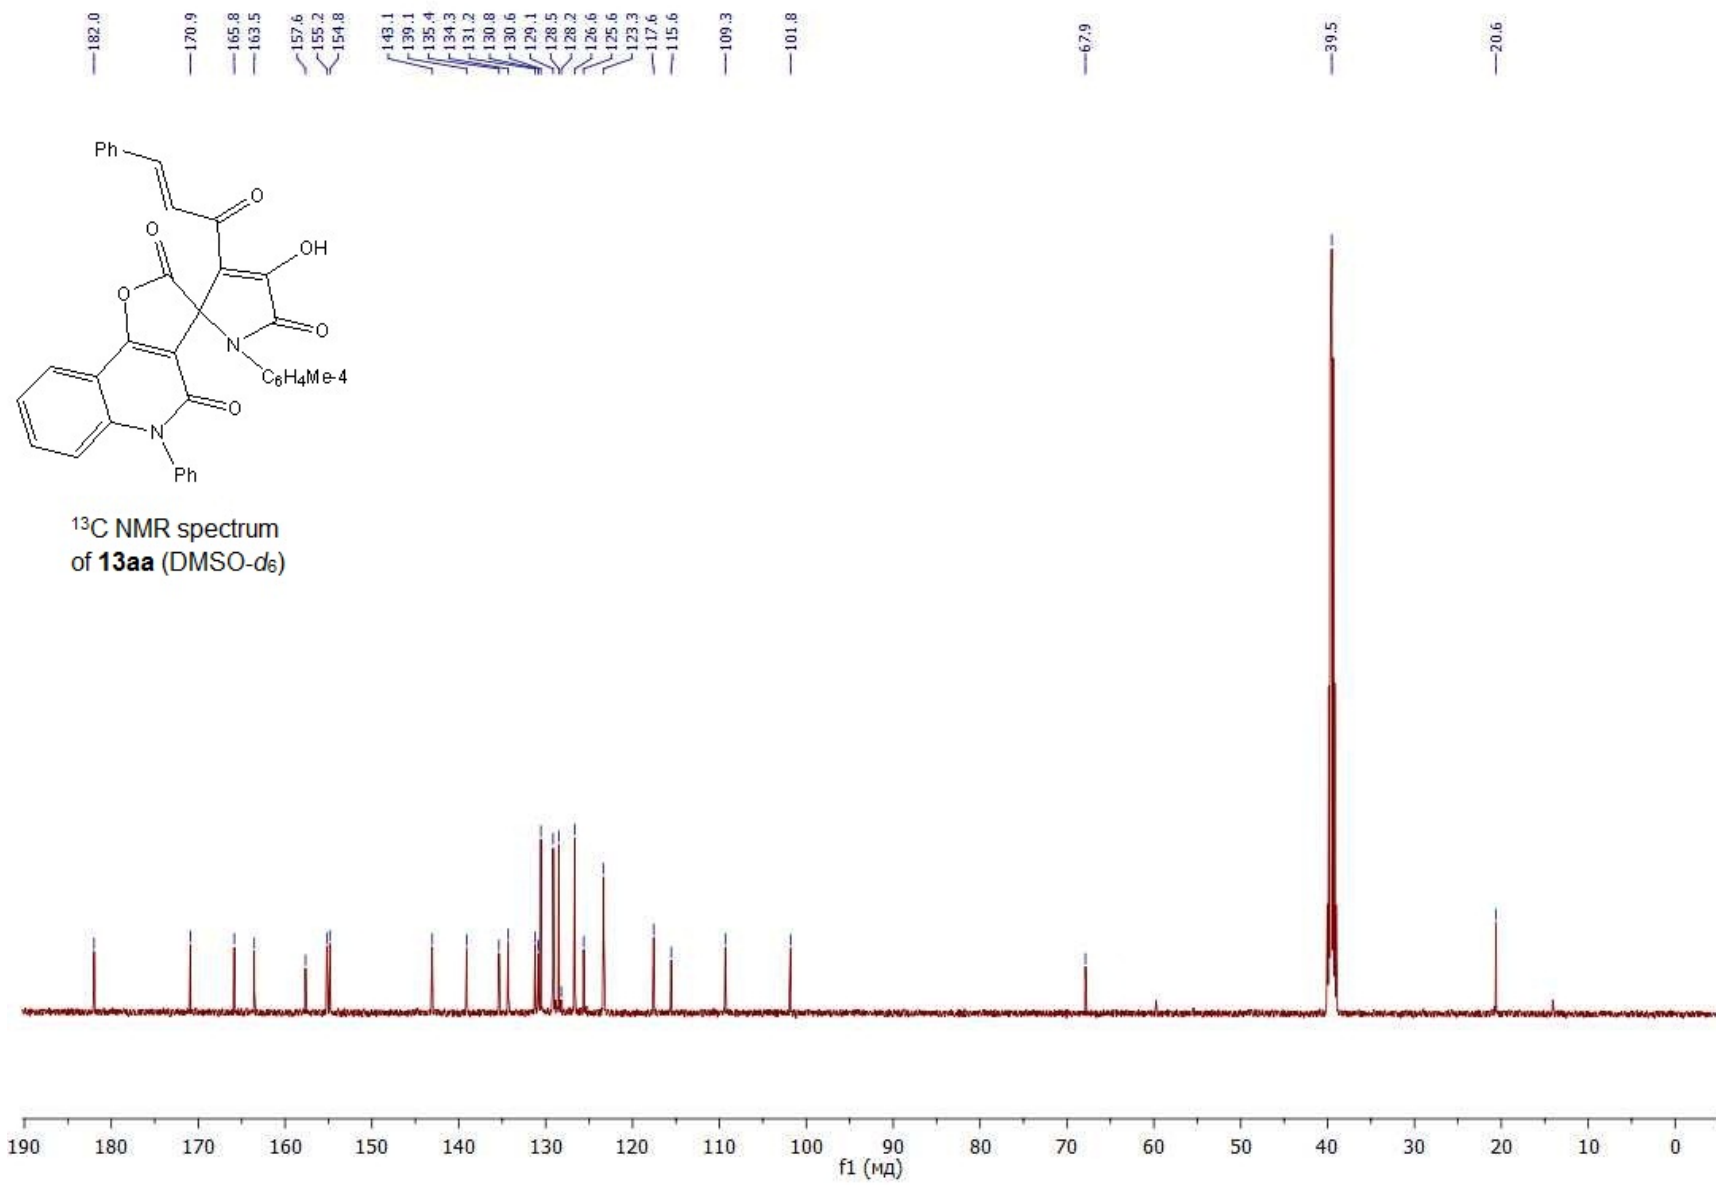

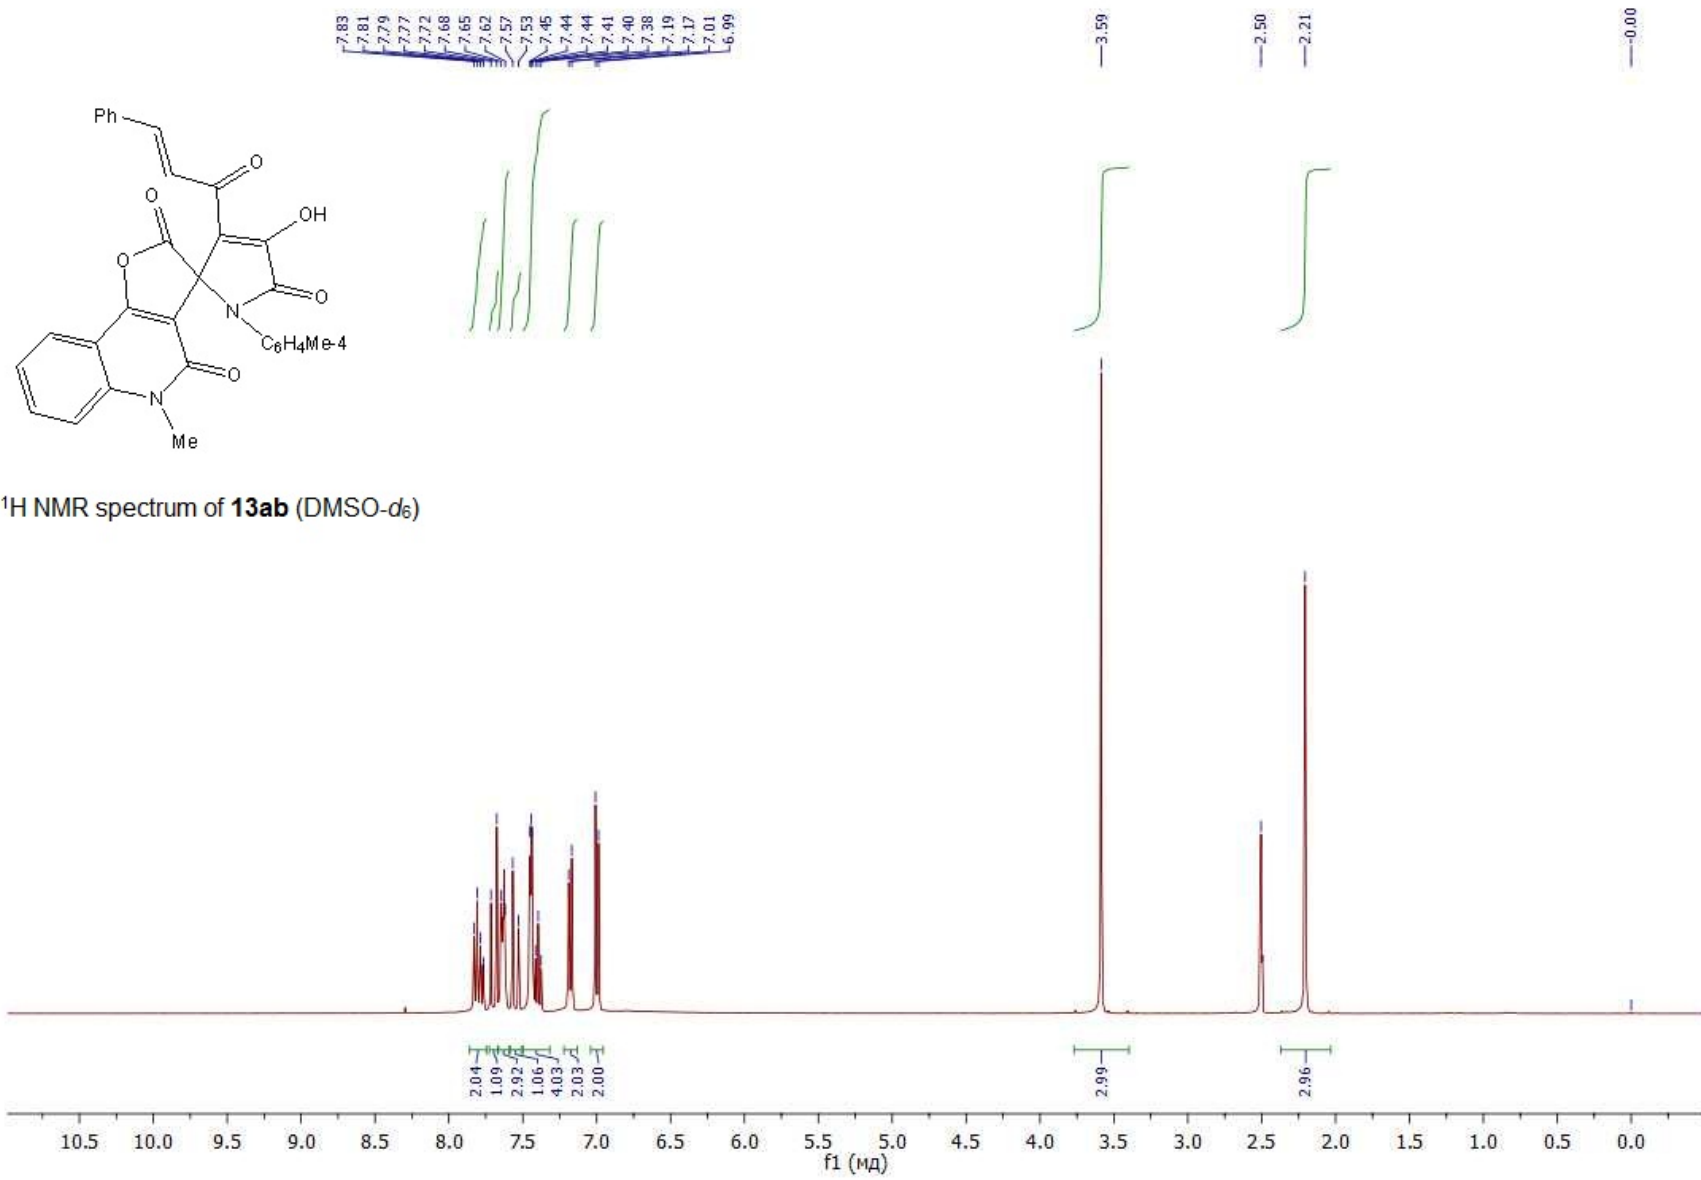

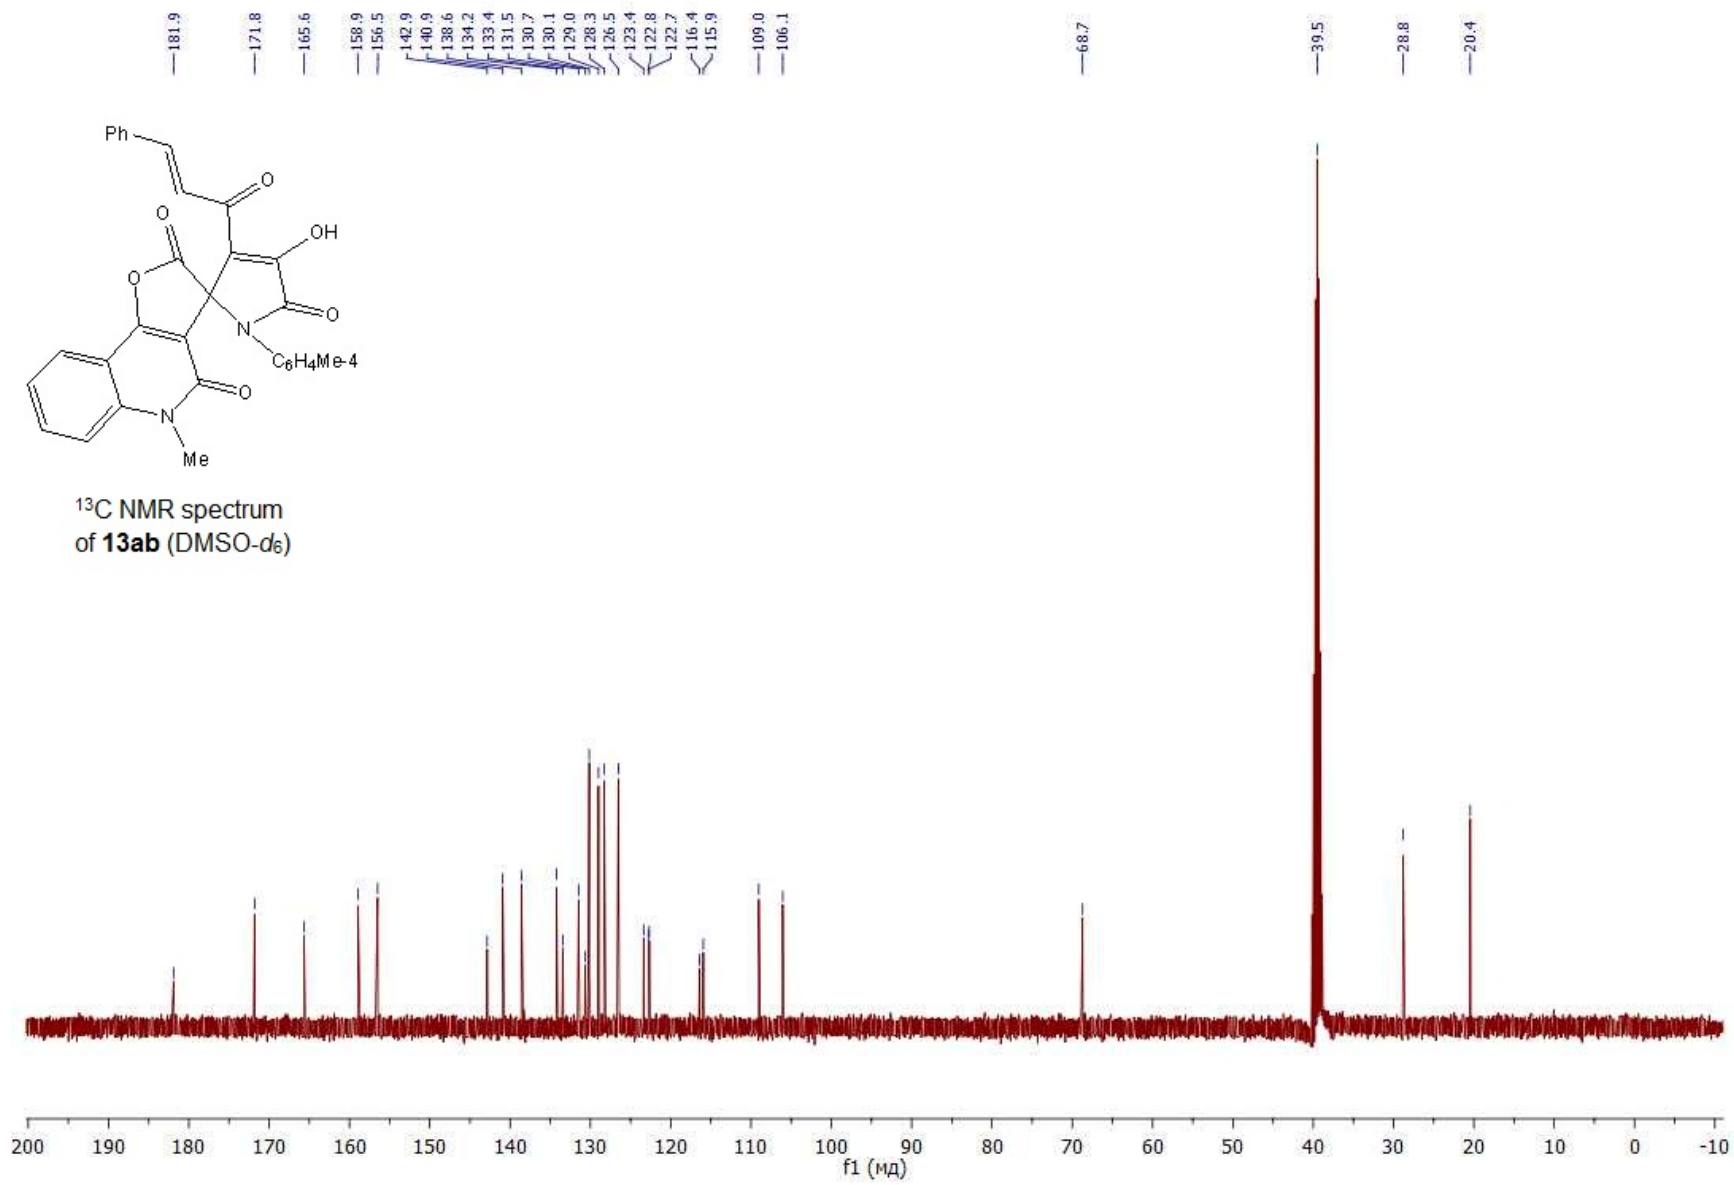

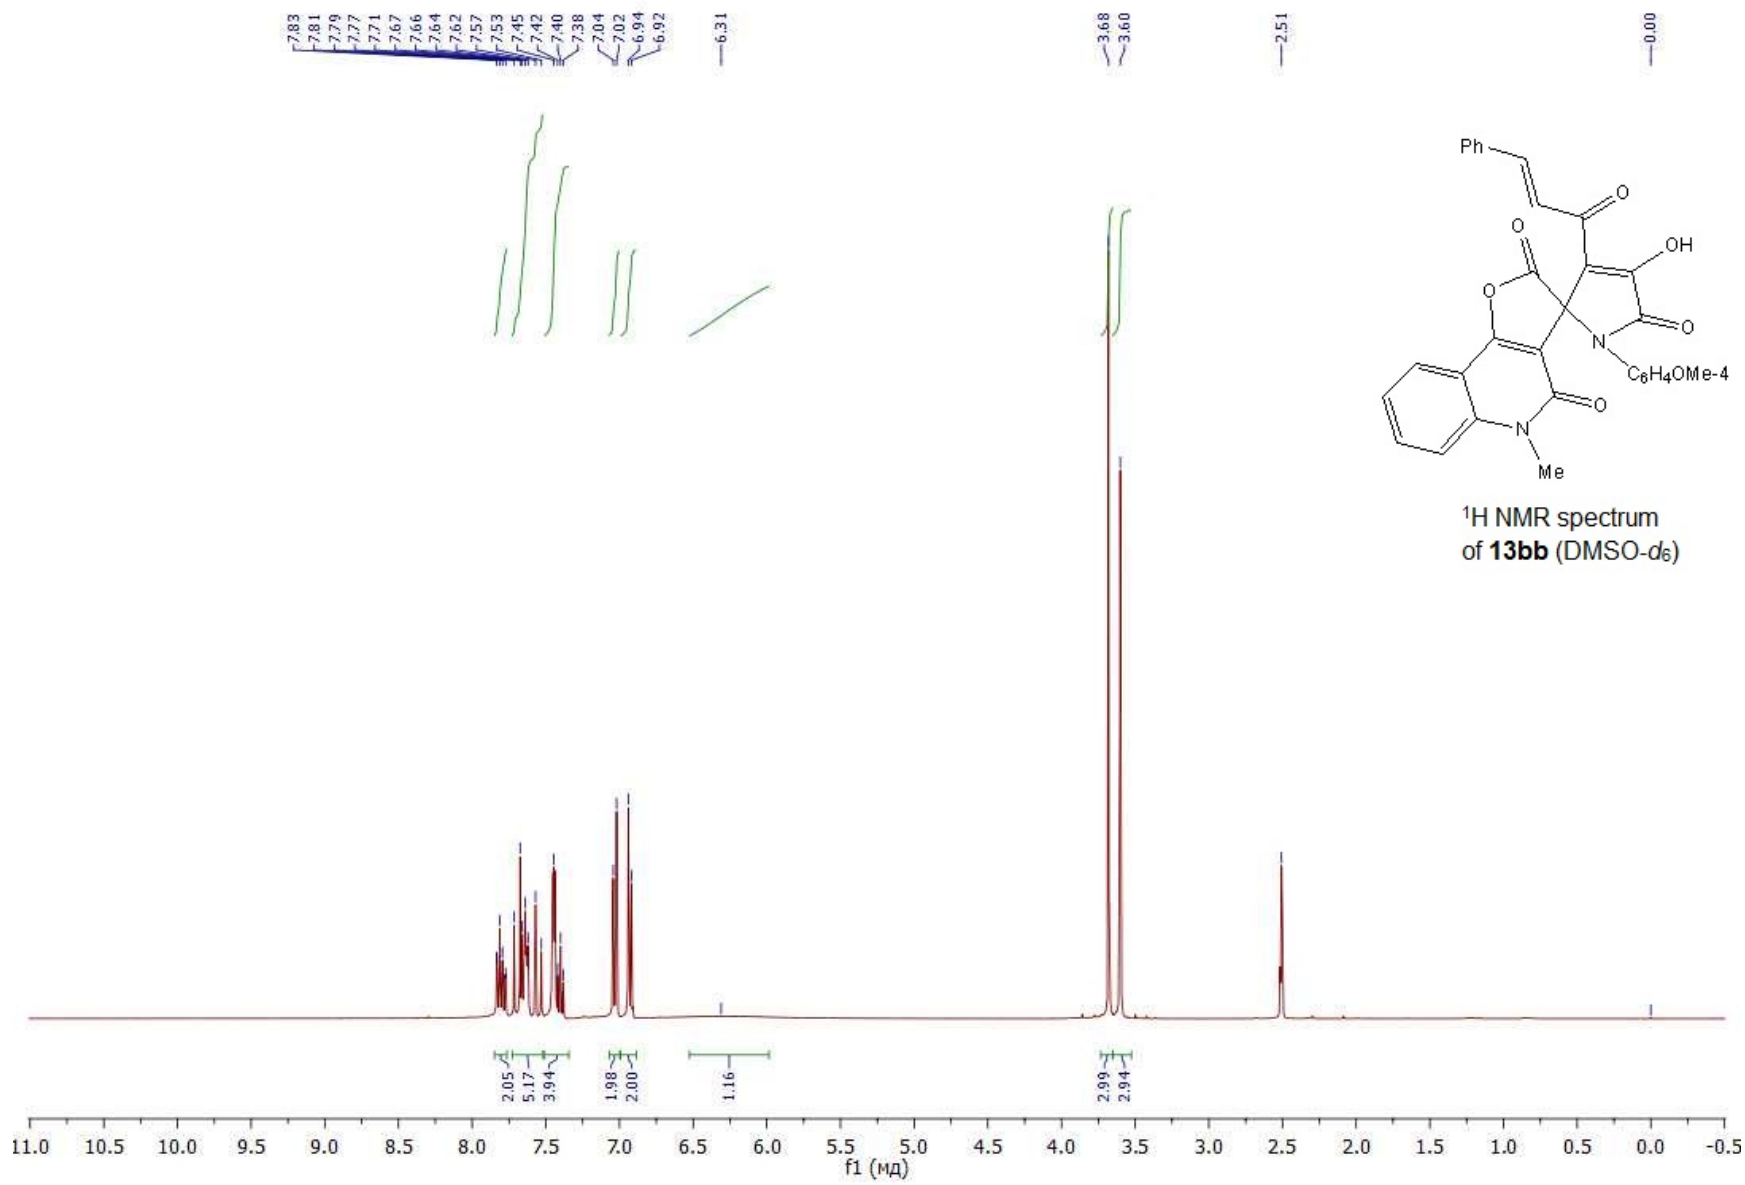

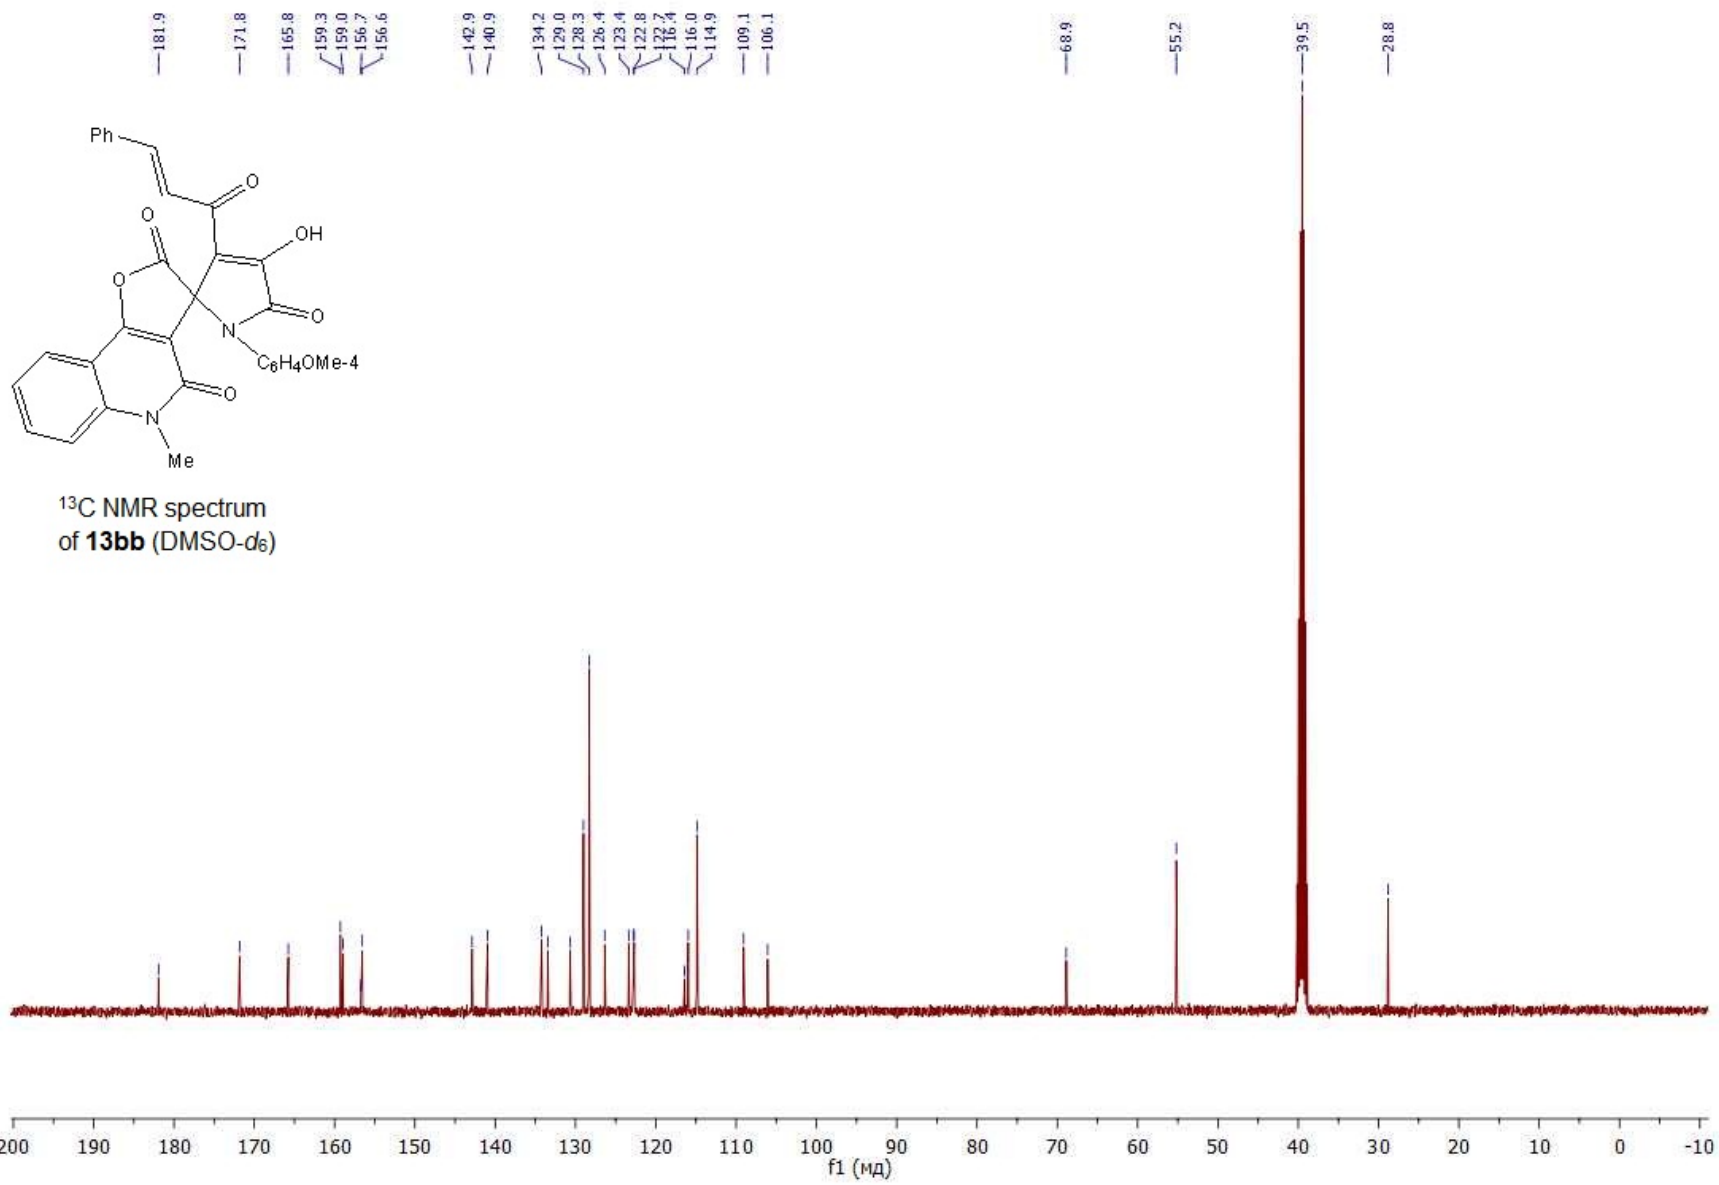

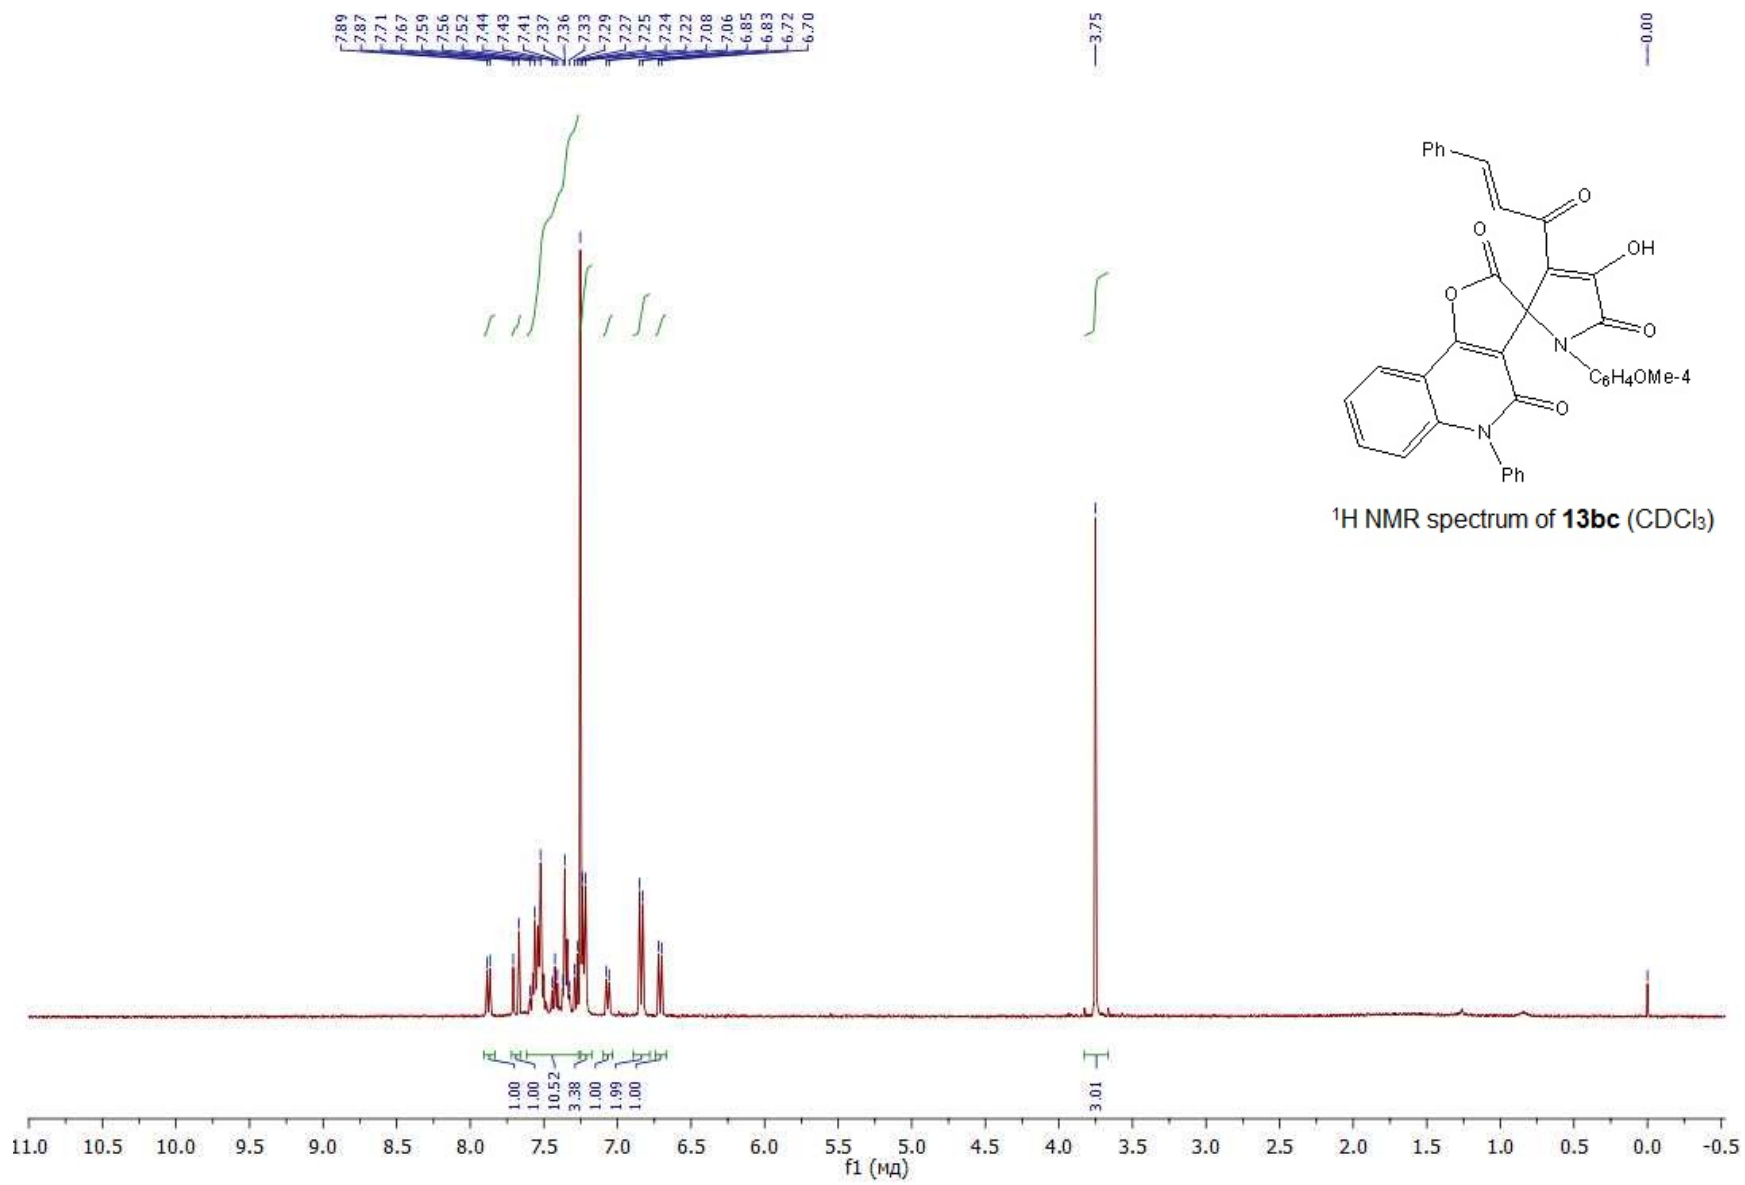

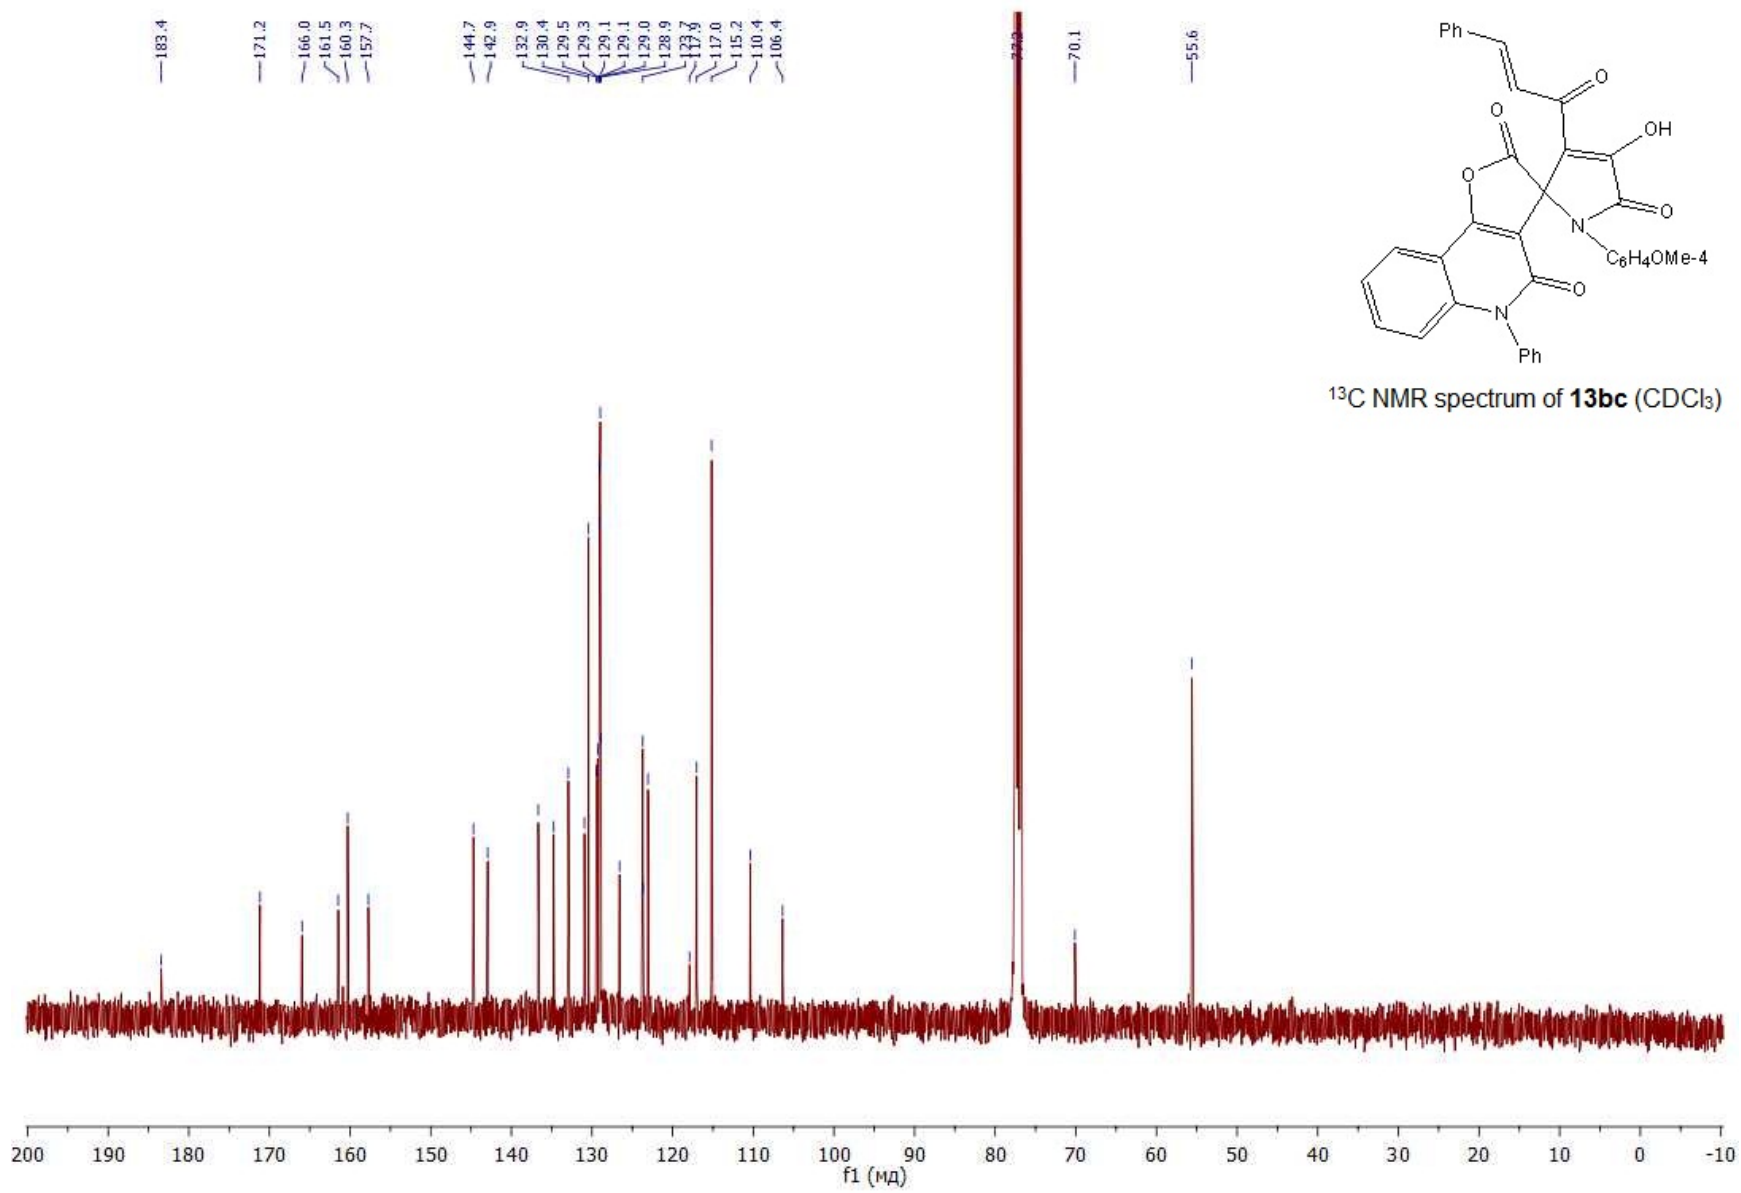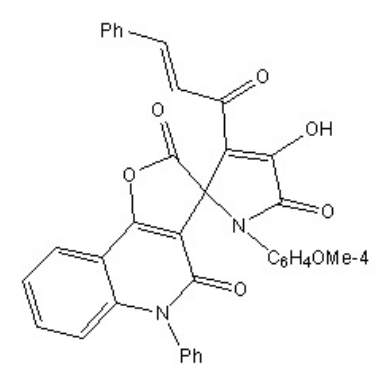

$^{13}\text{C}$  NMR spectrum of **13bc** ( $\text{CDCl}_3$ )

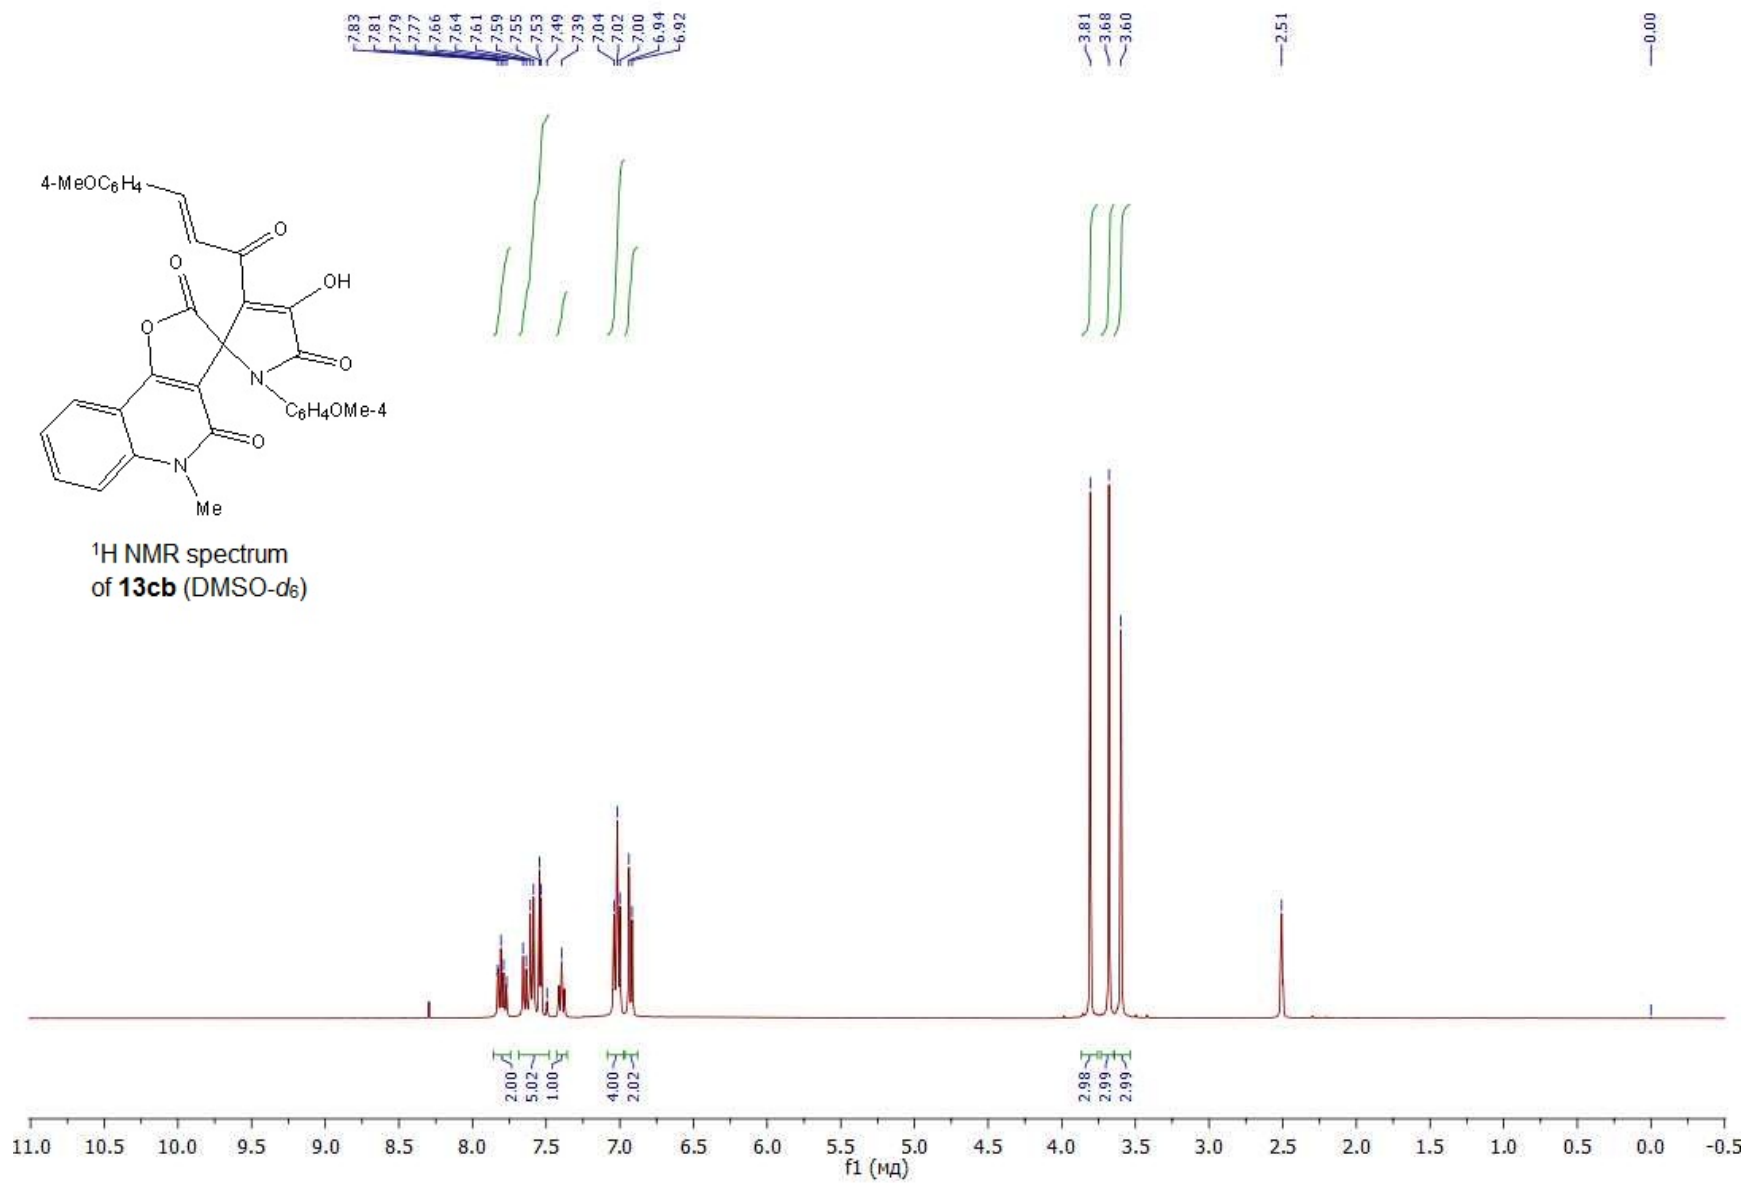



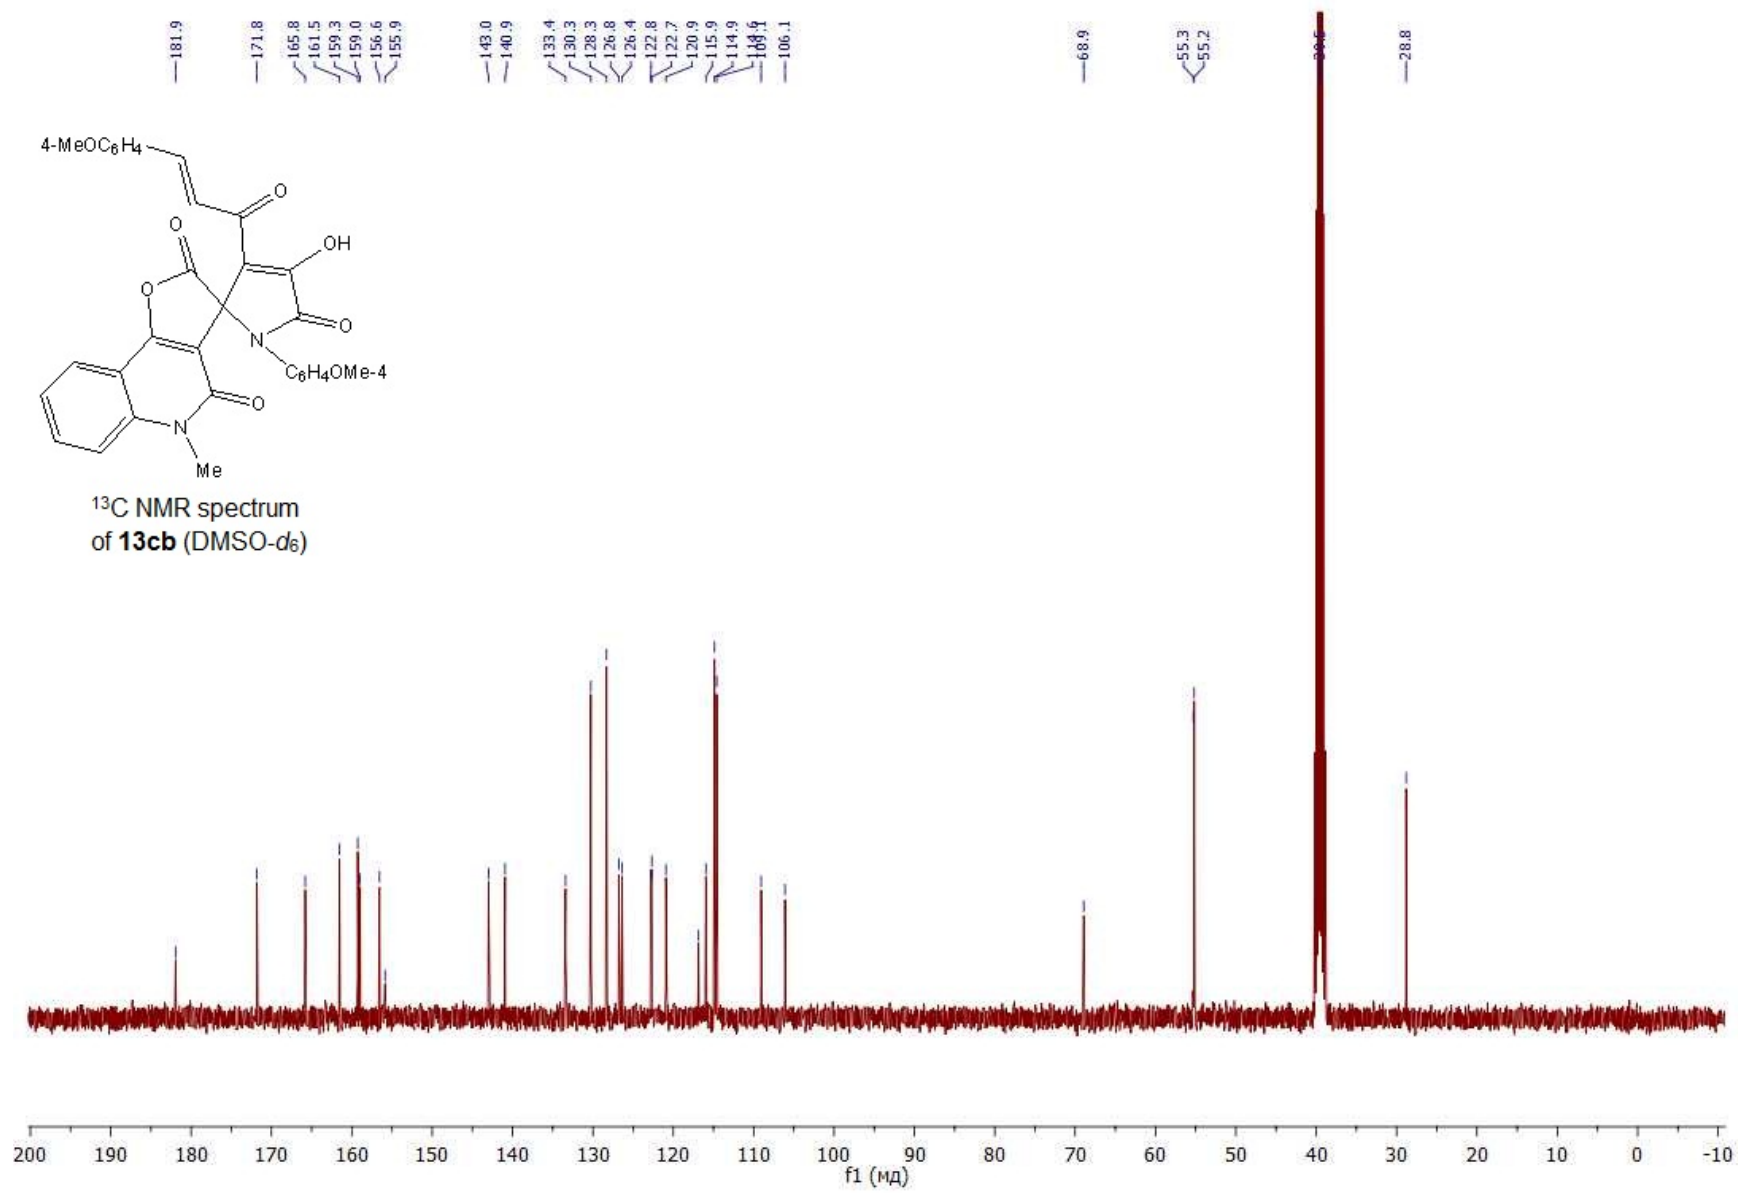

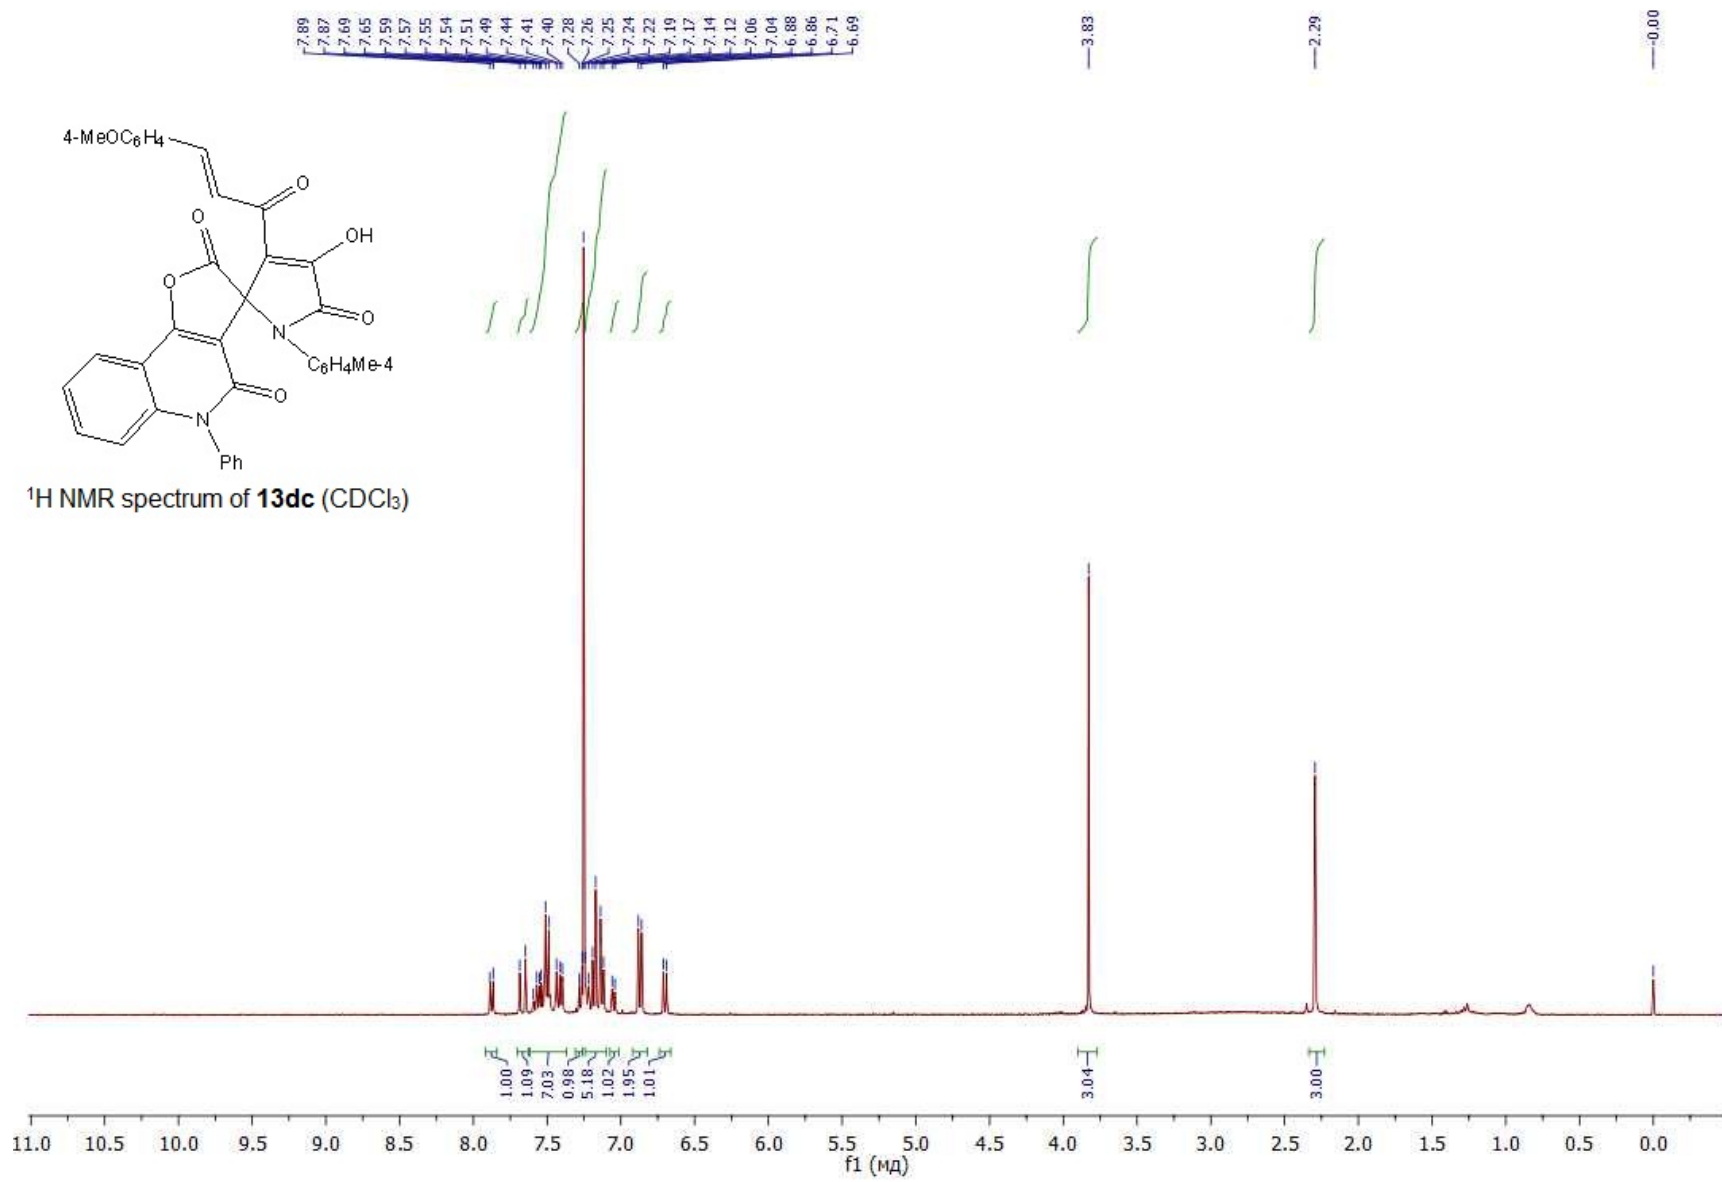

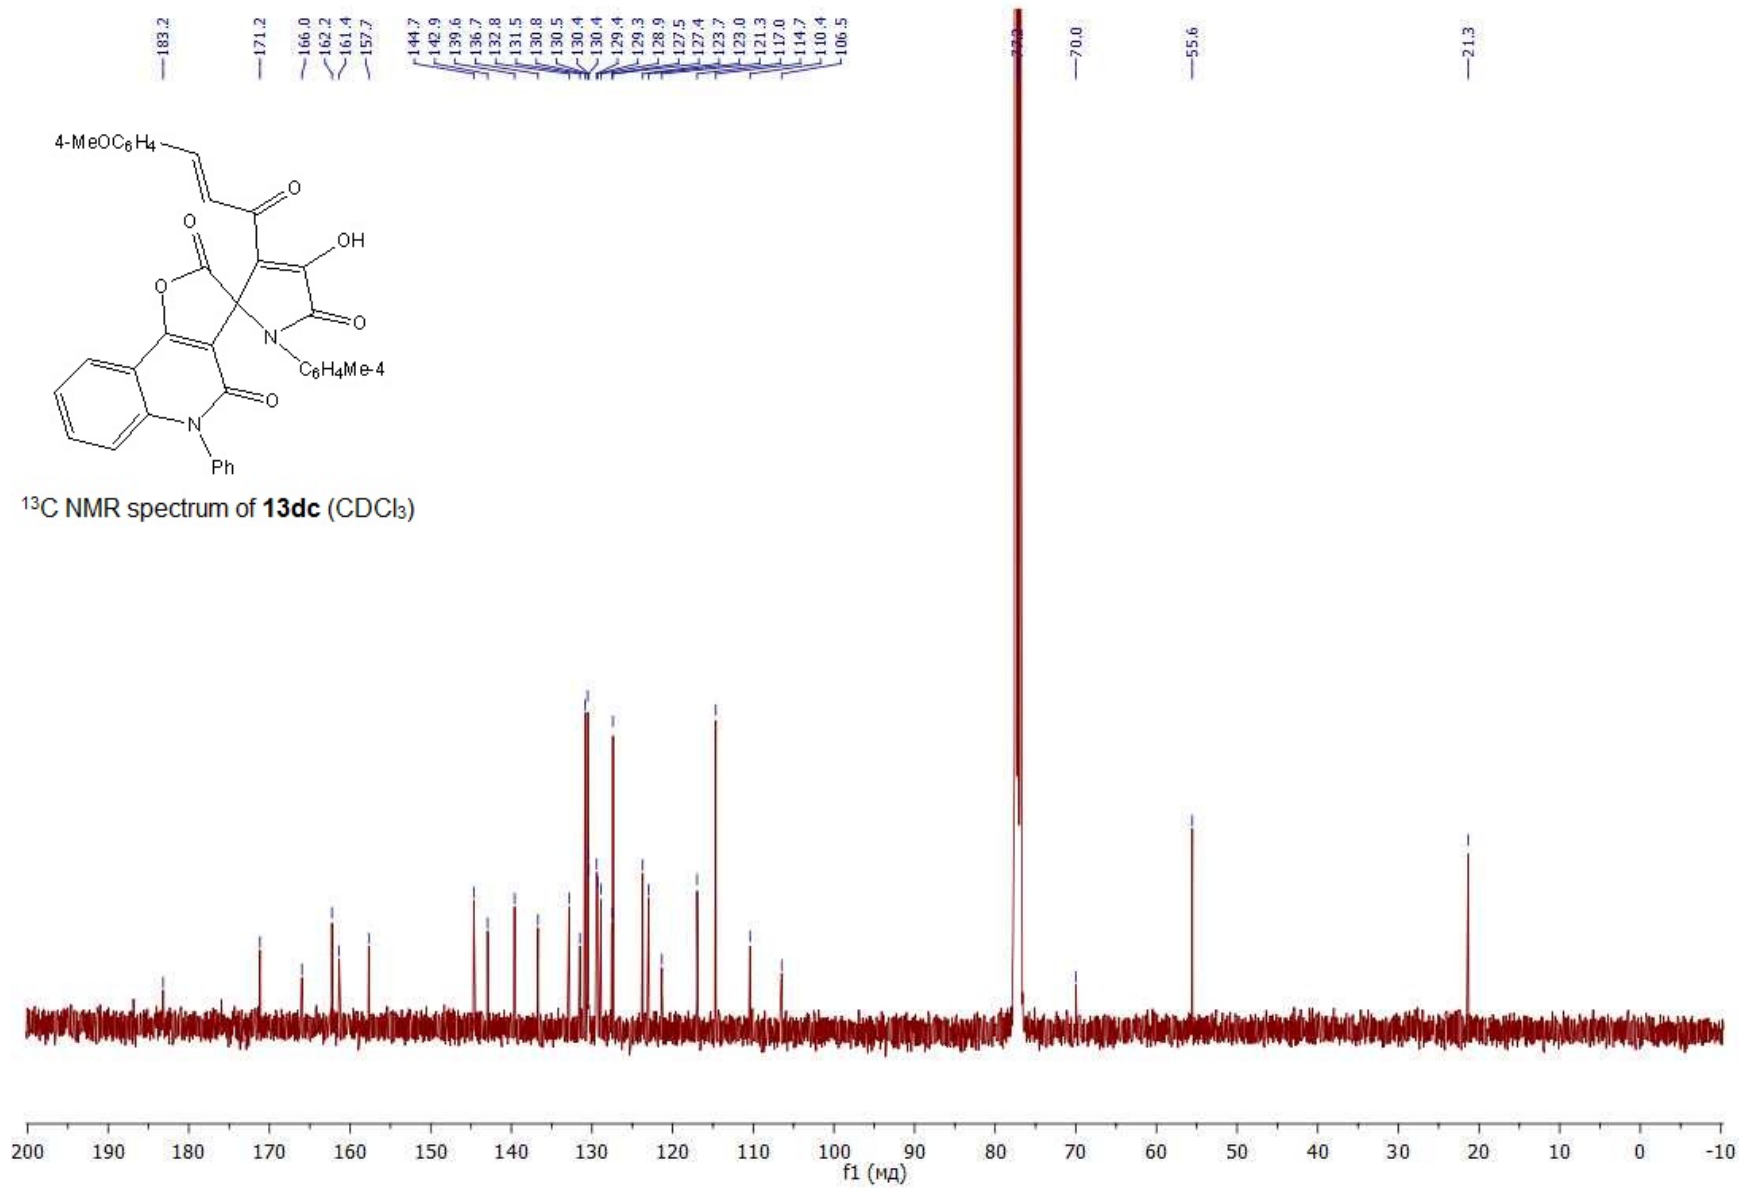

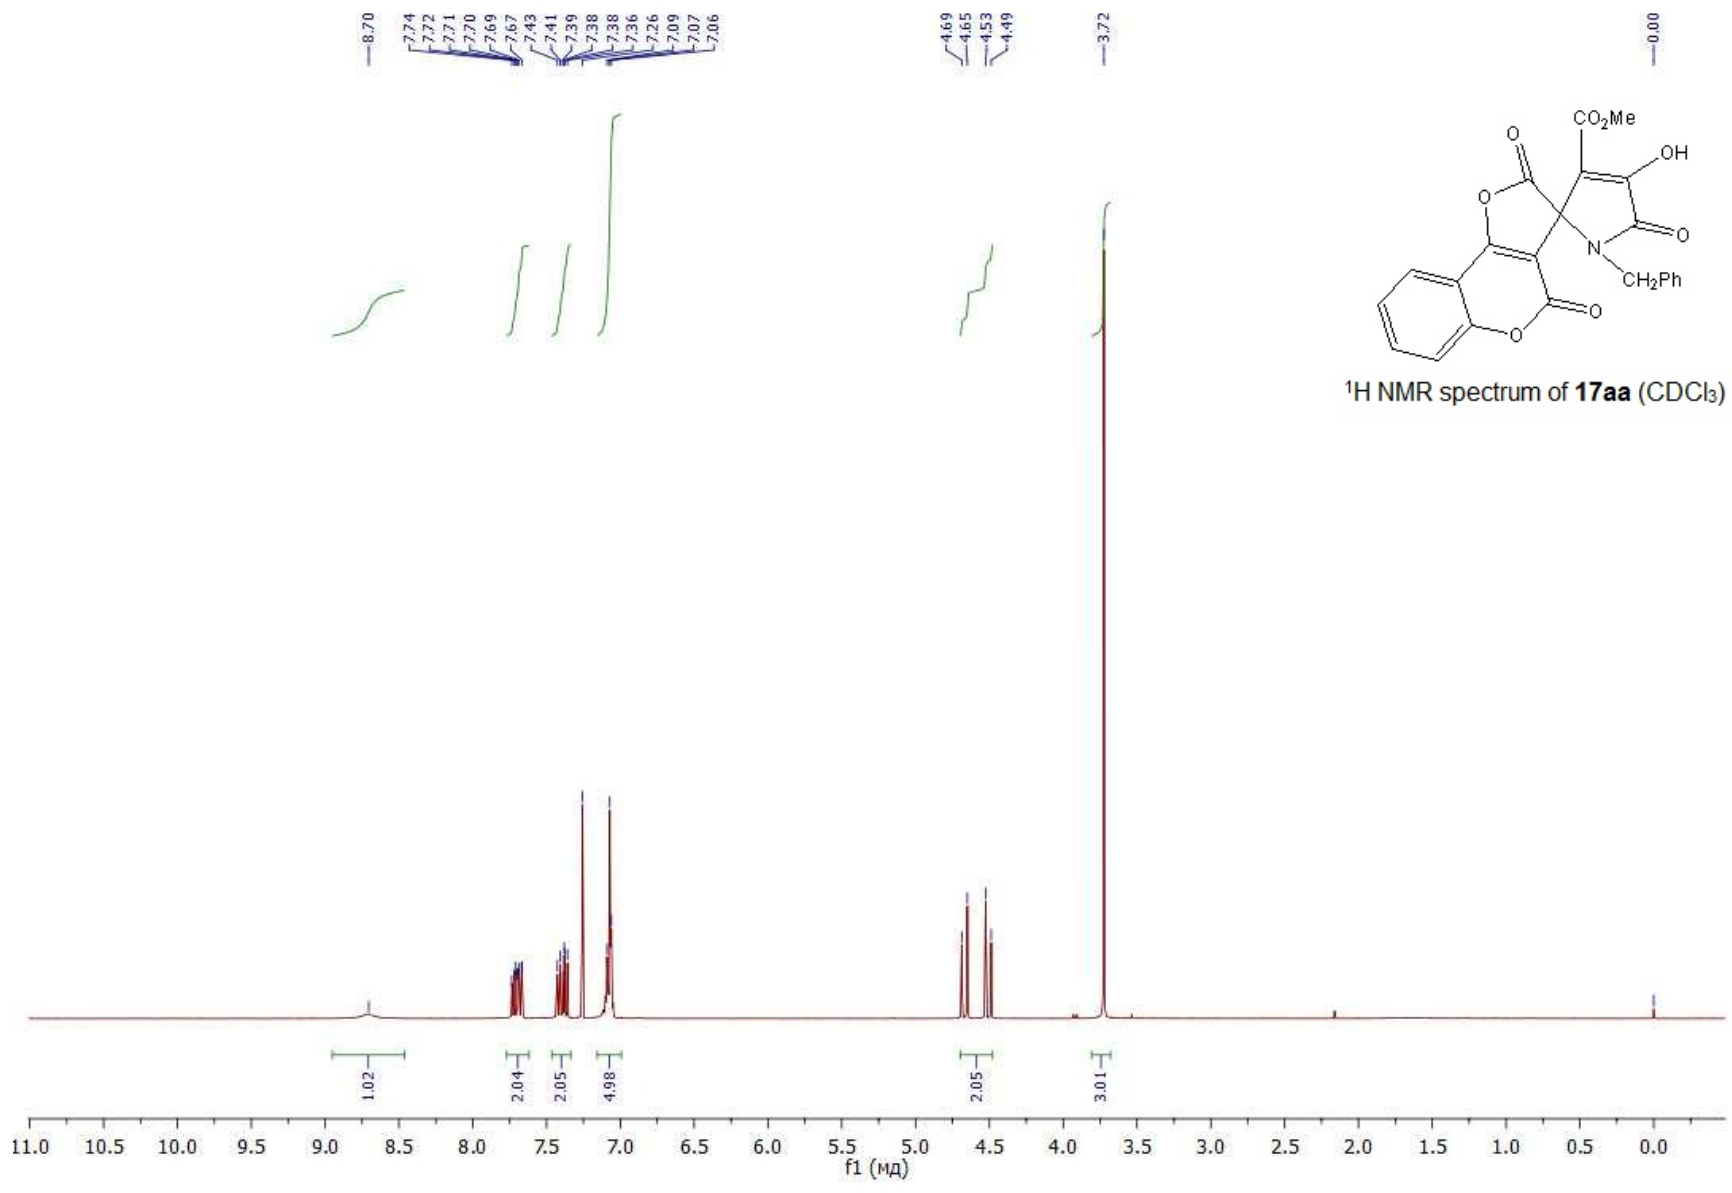

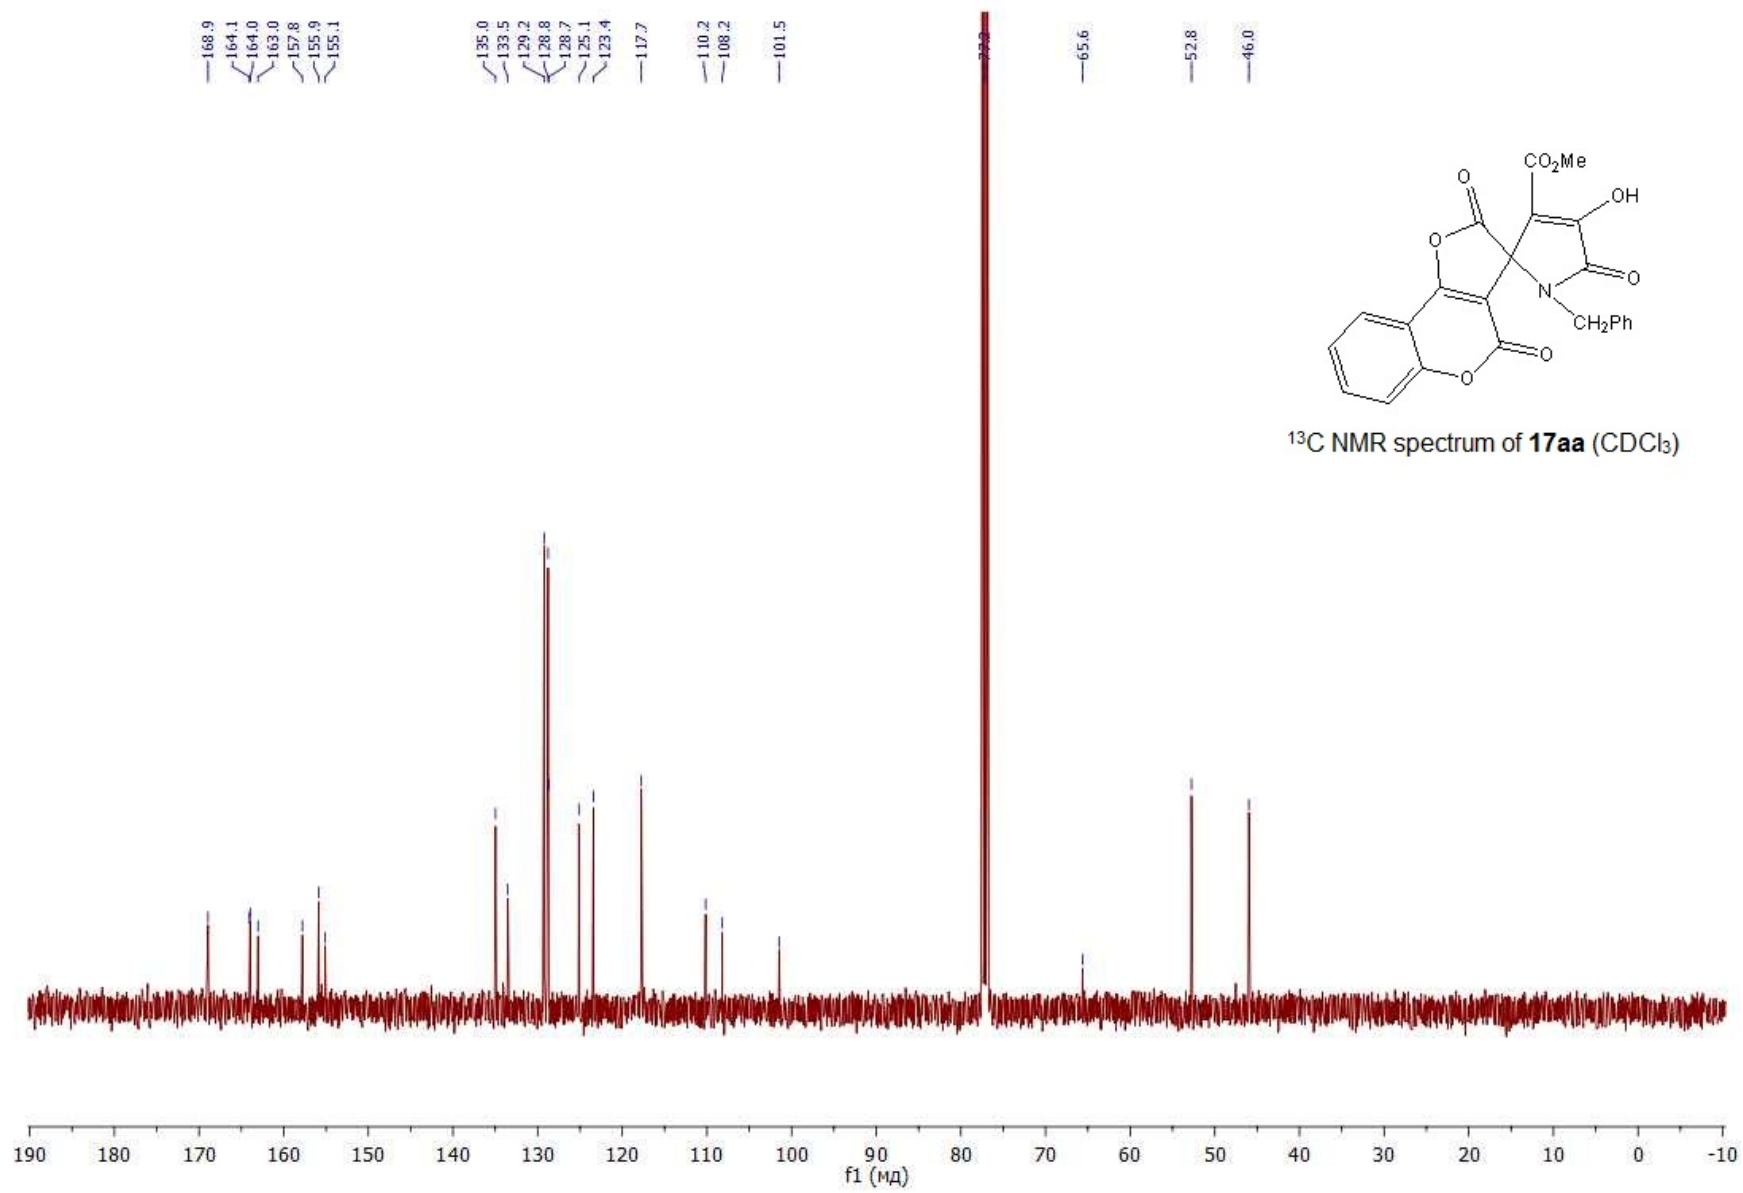

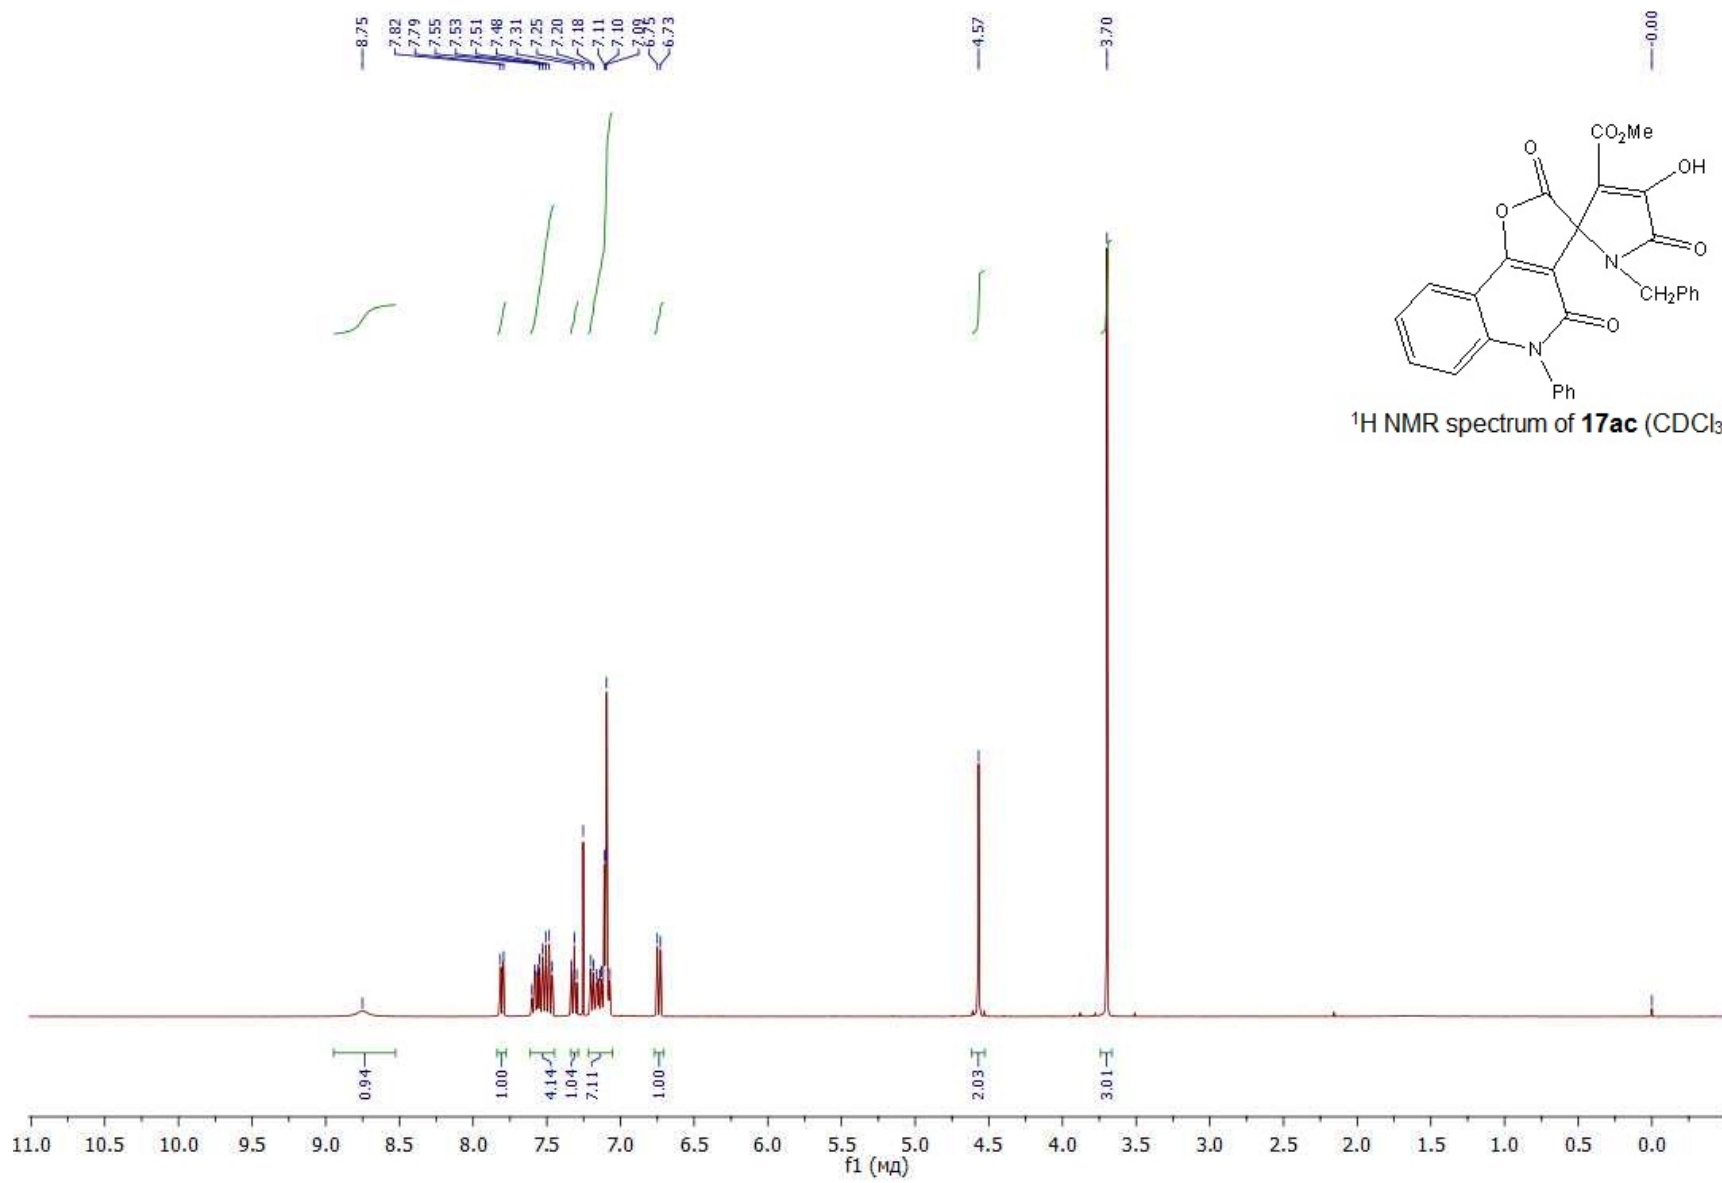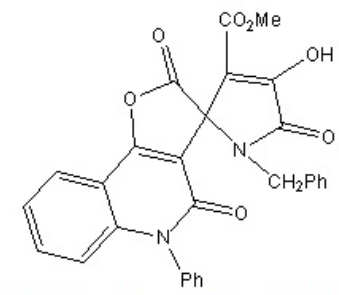

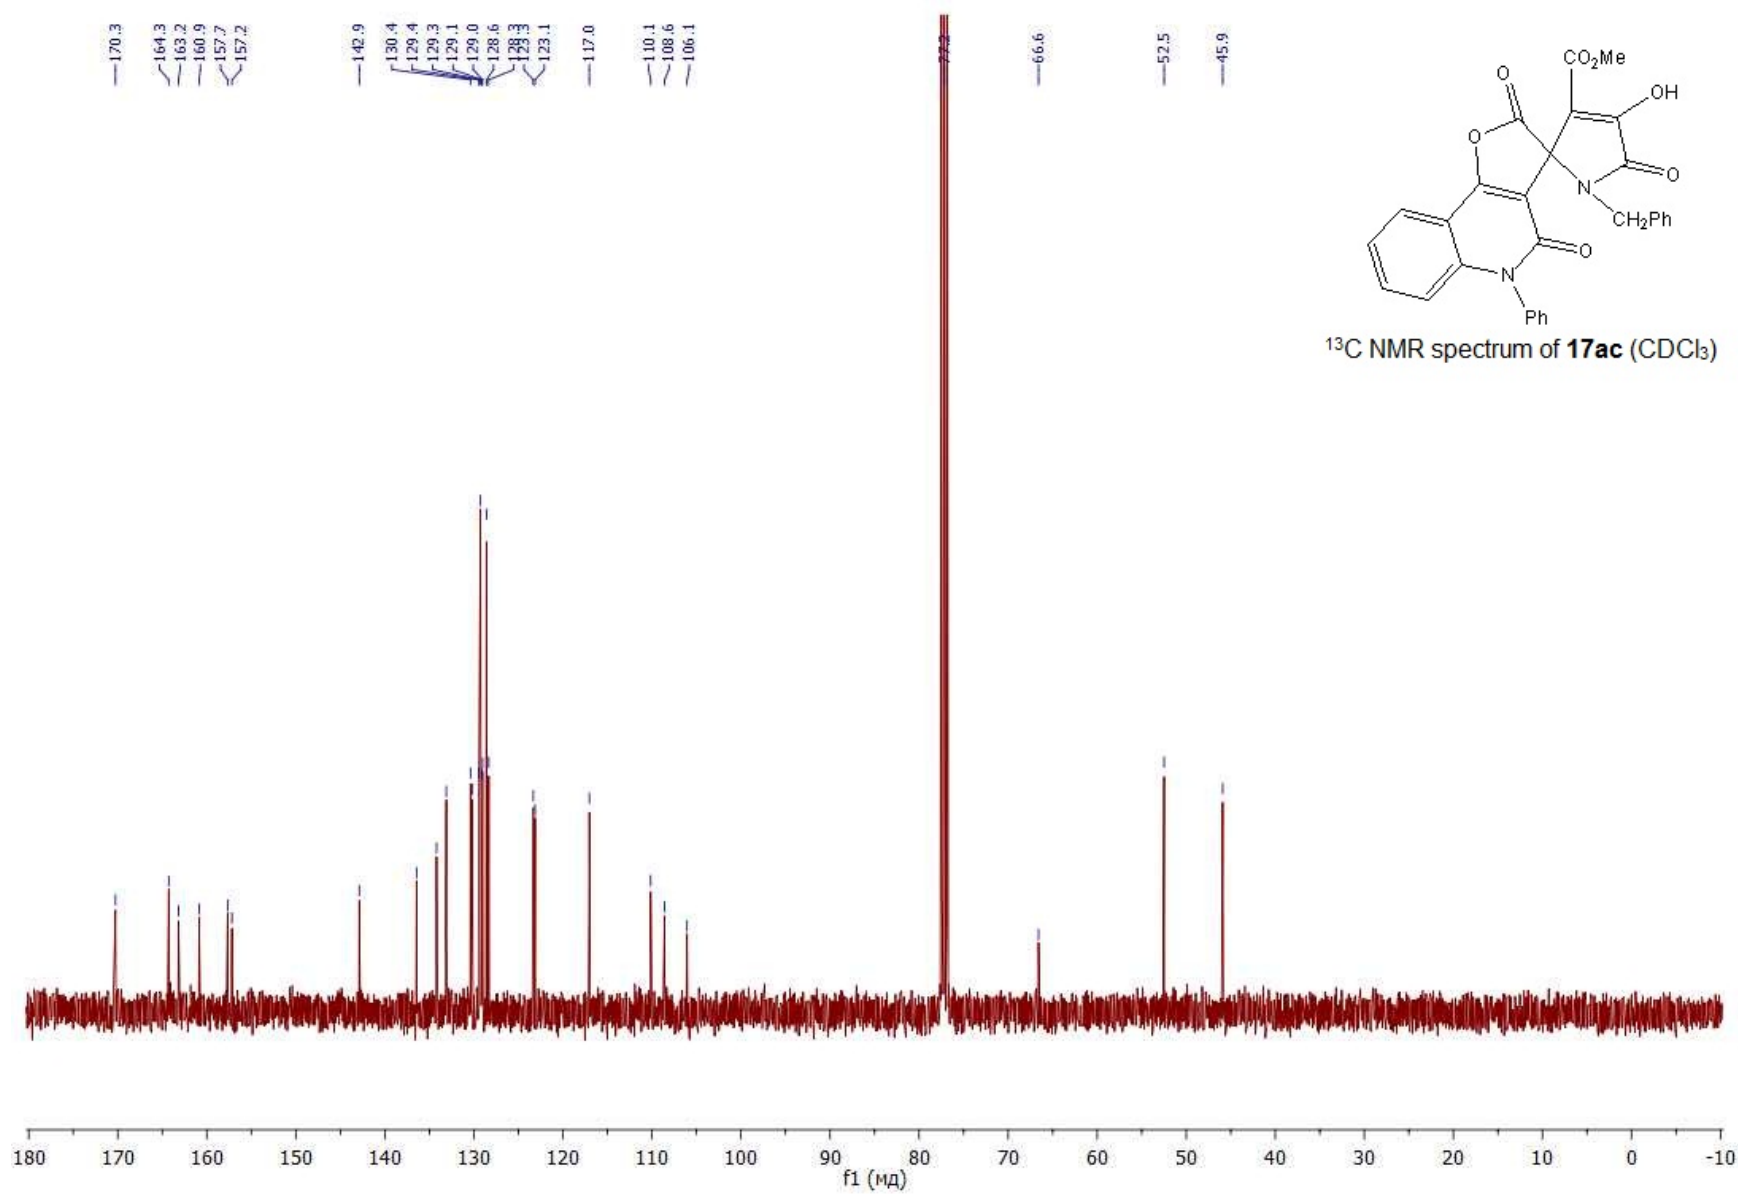

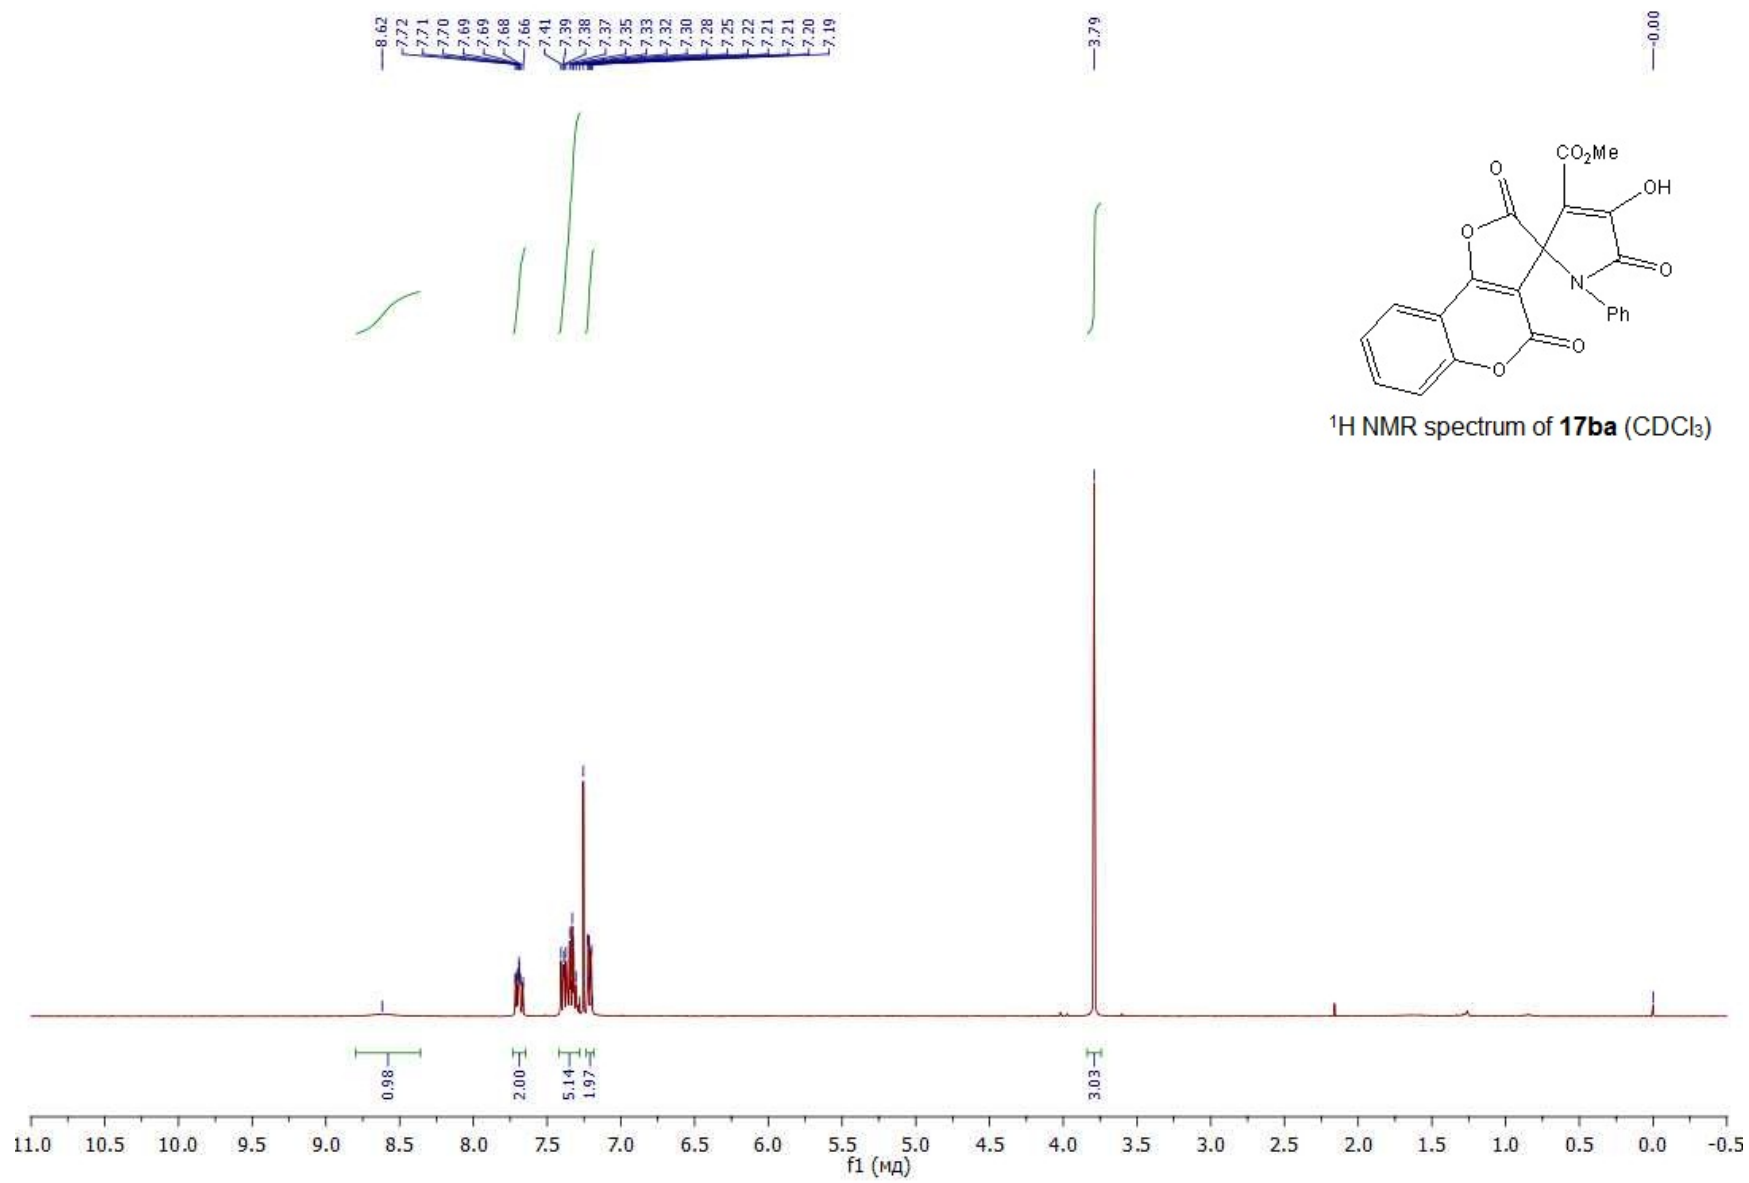



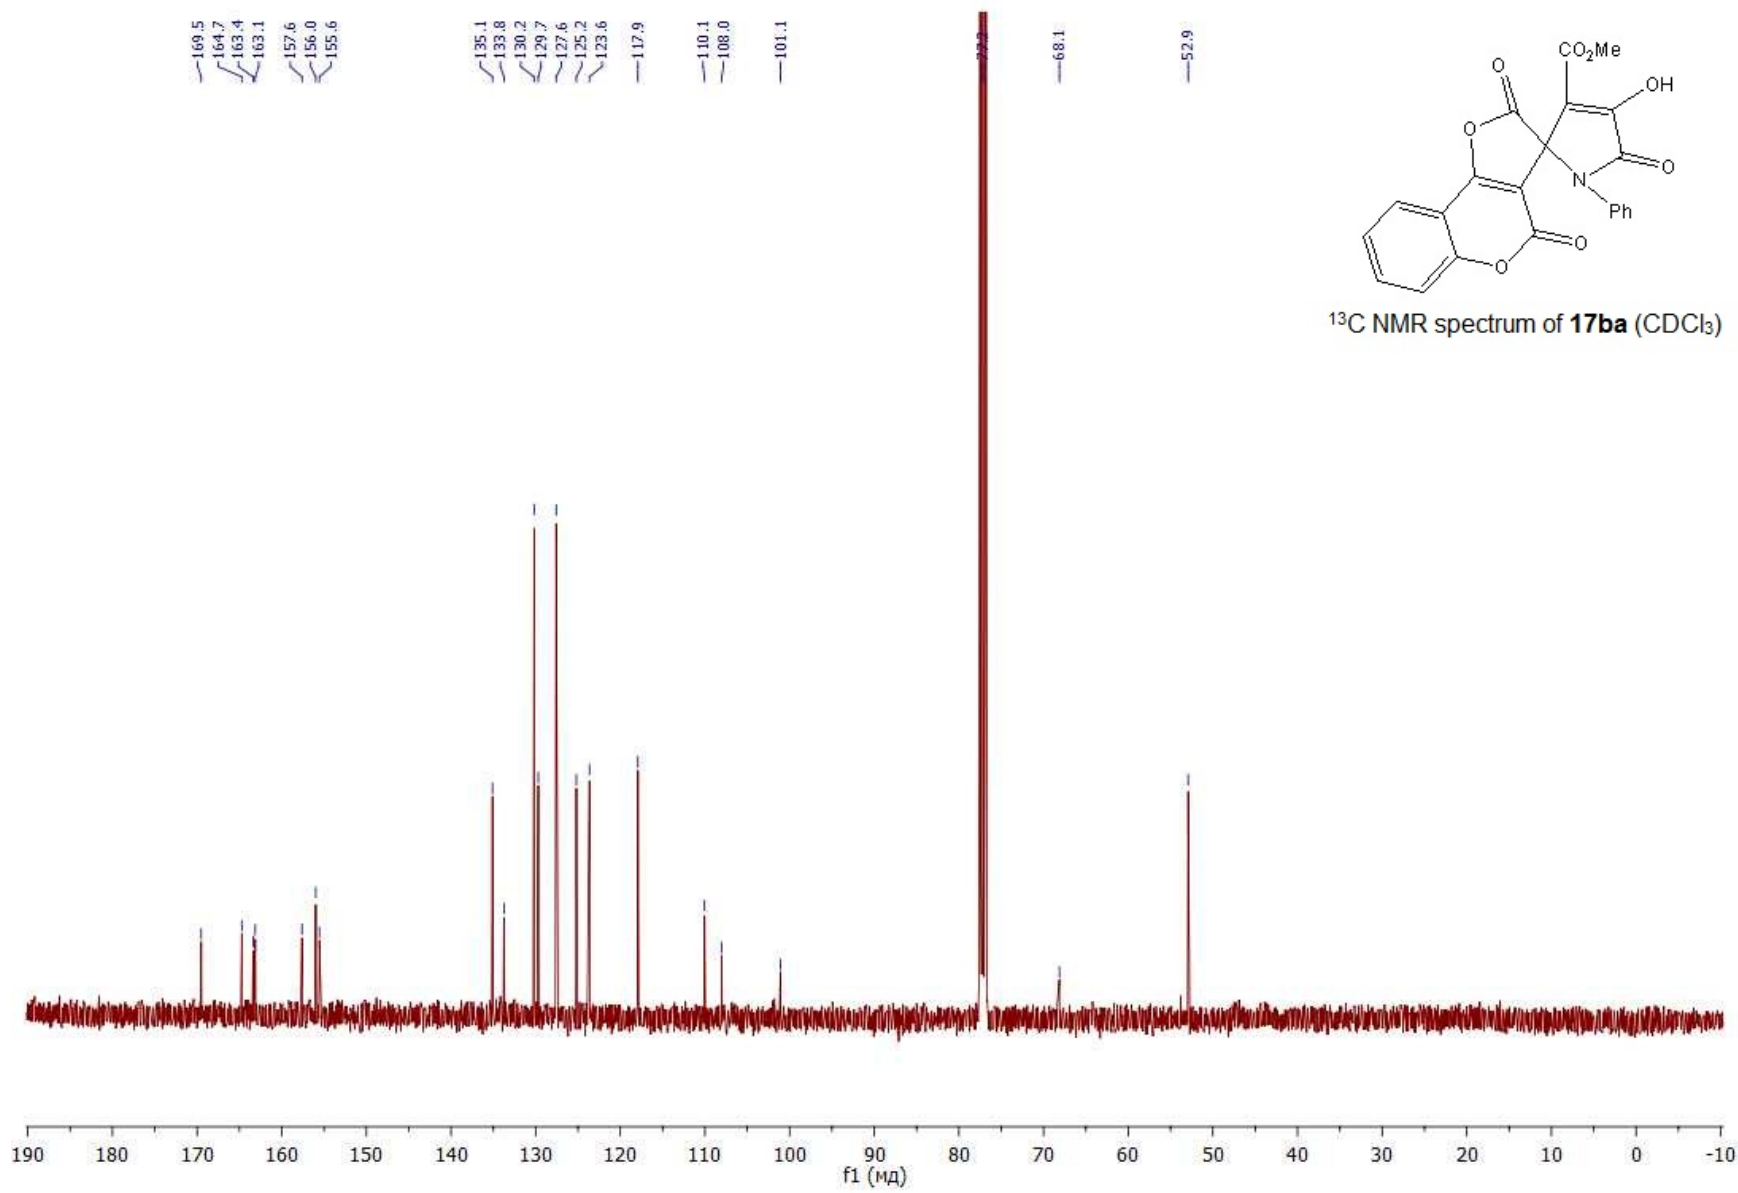

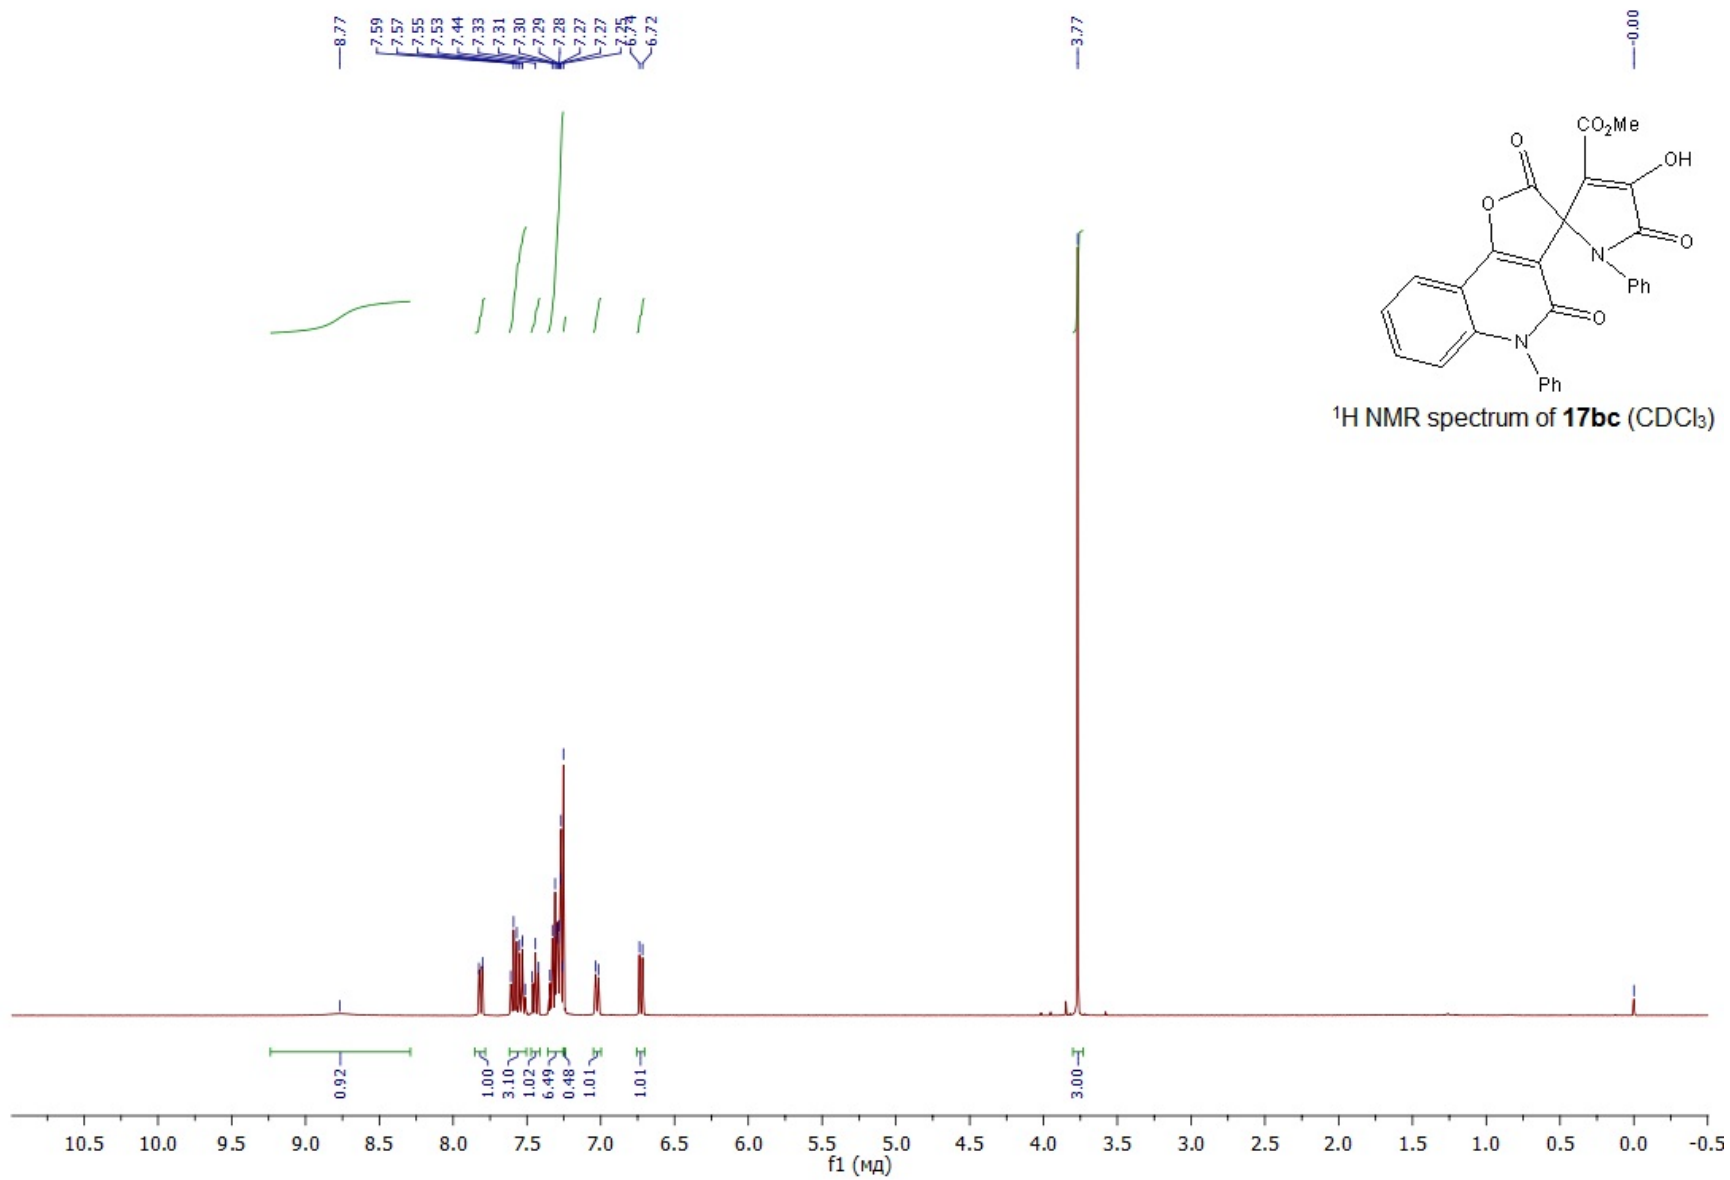

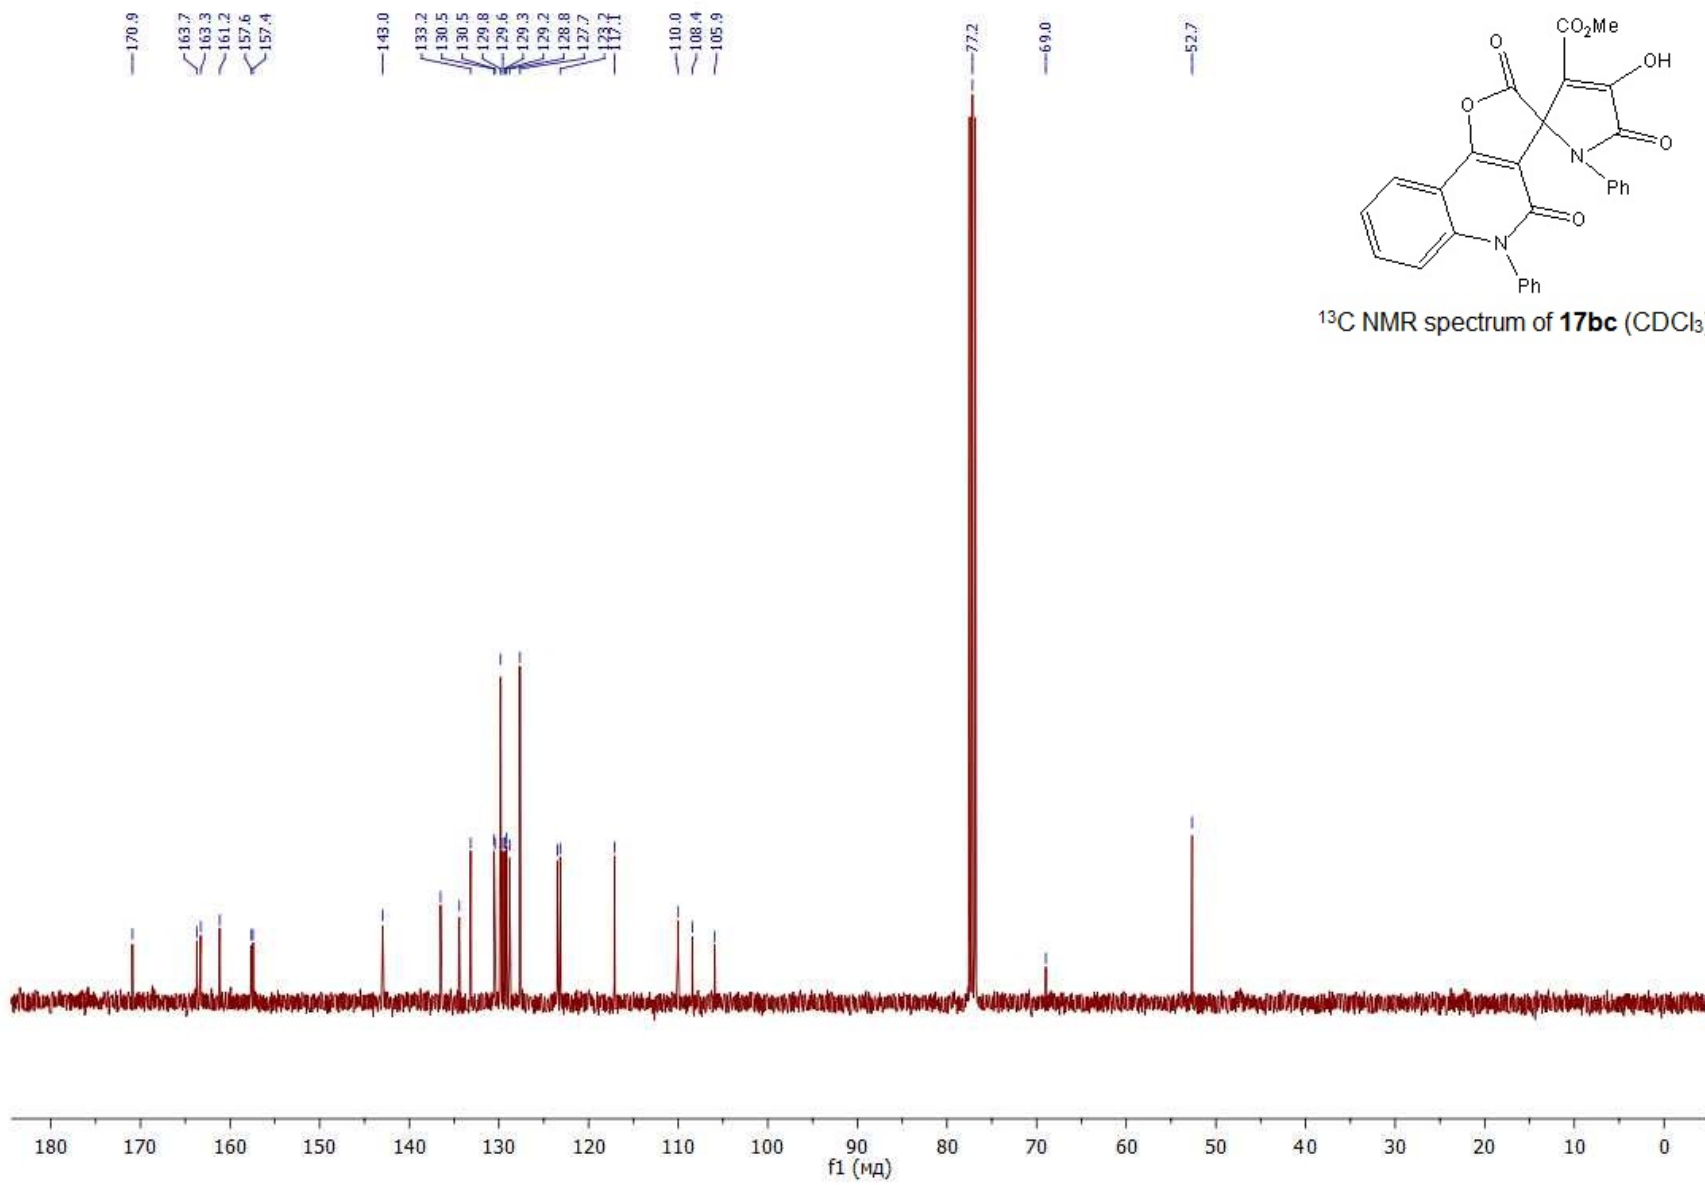

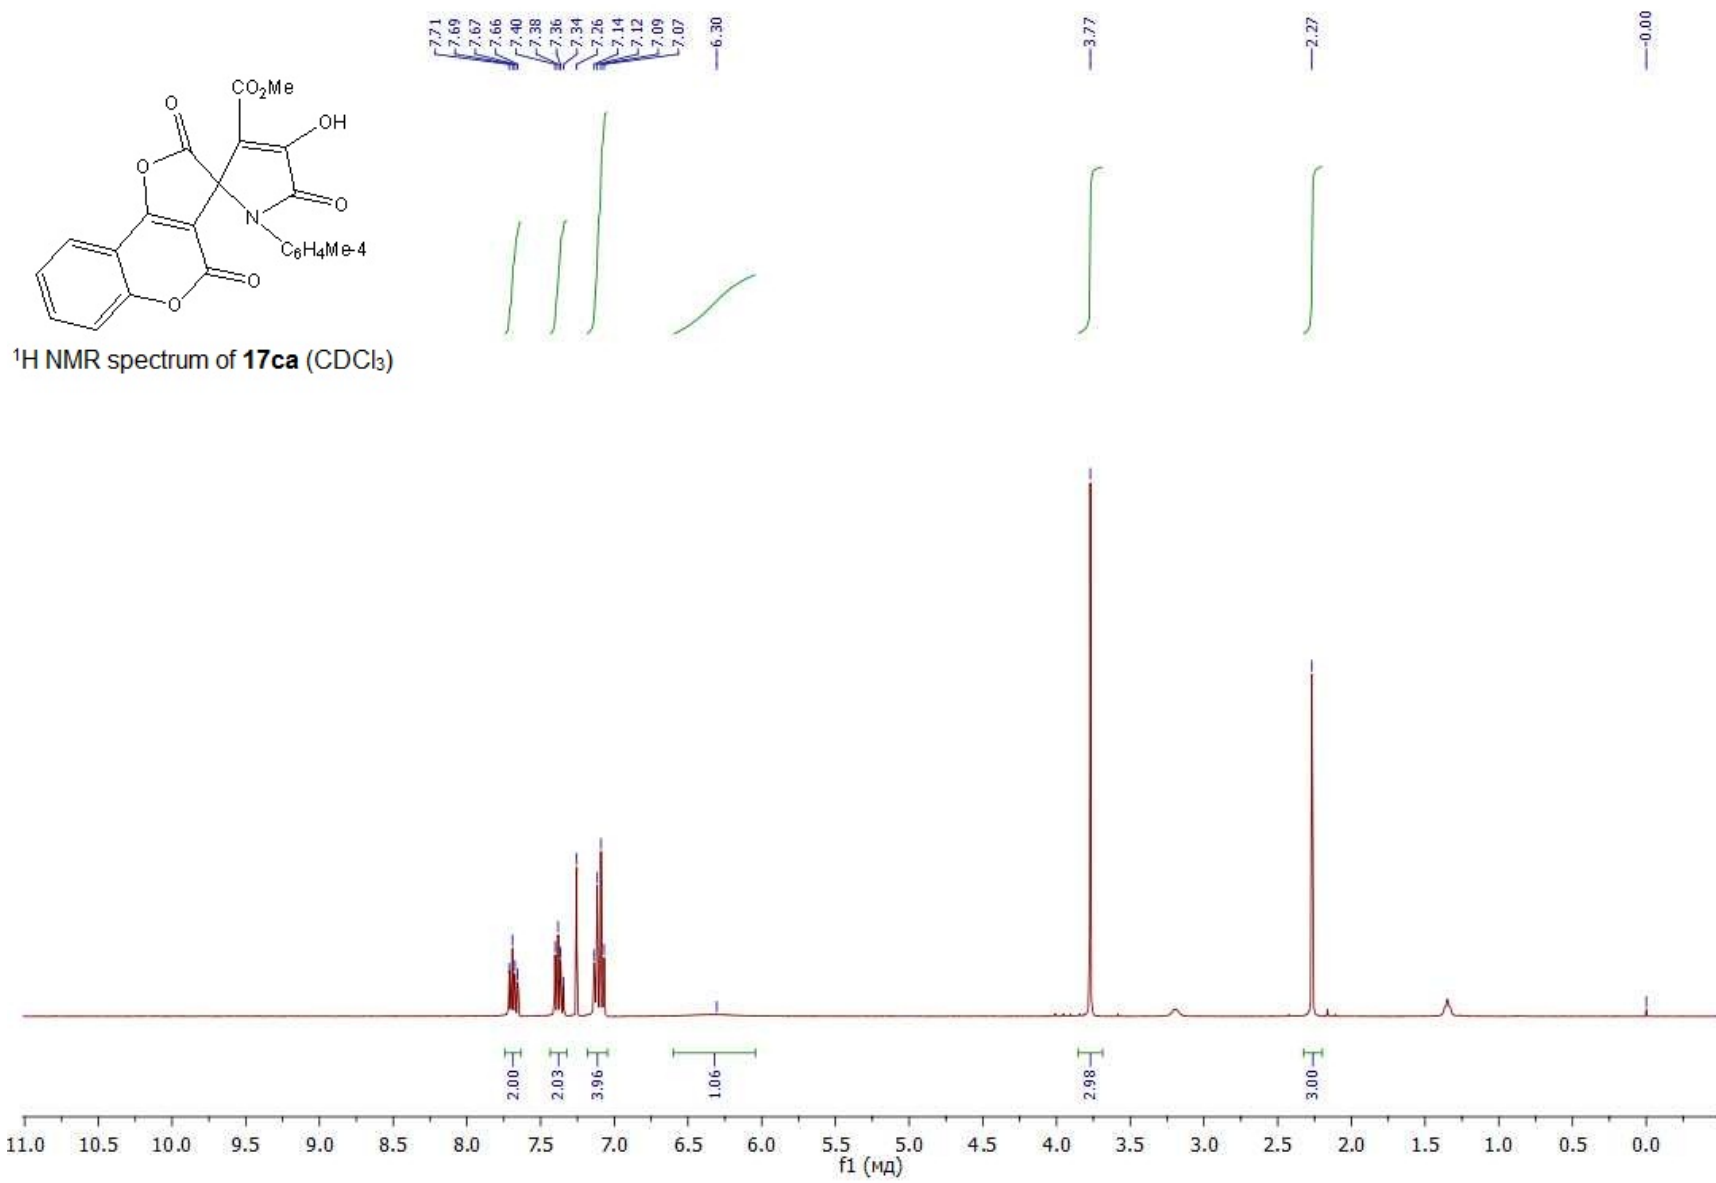

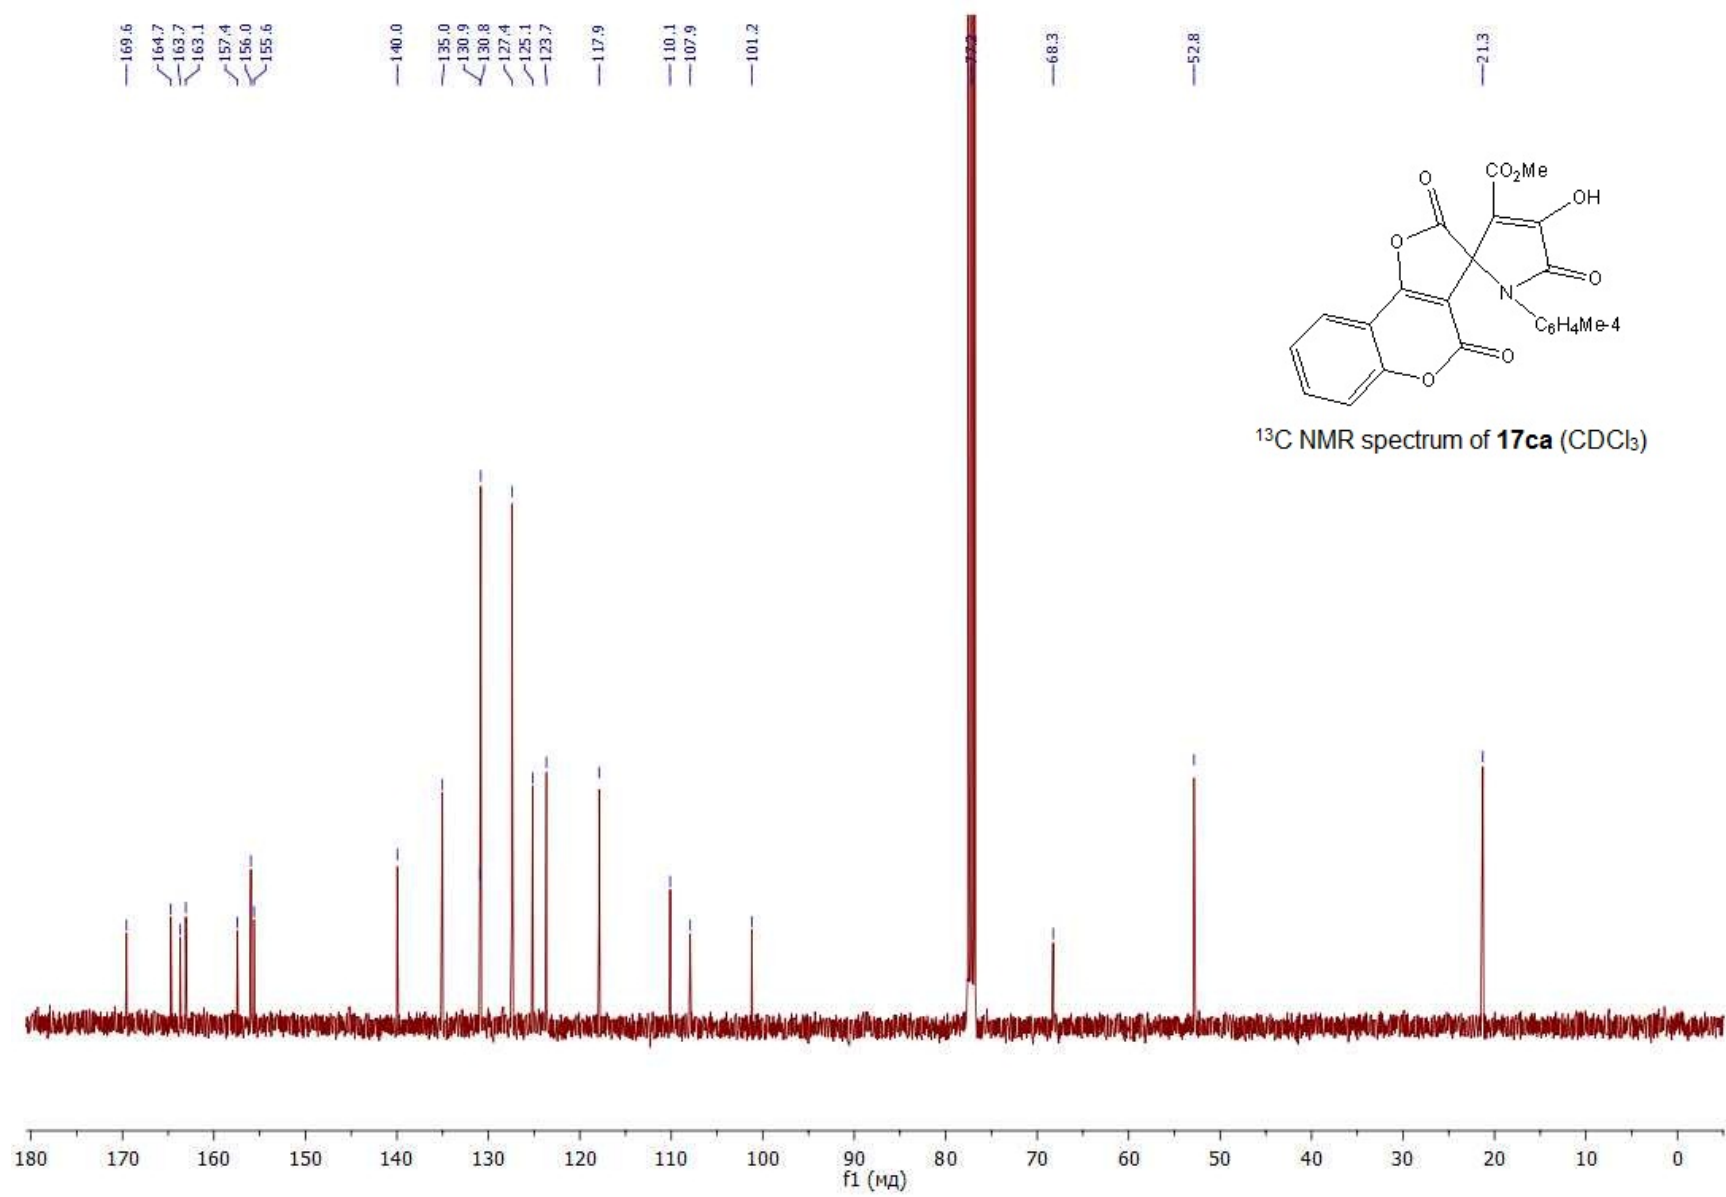

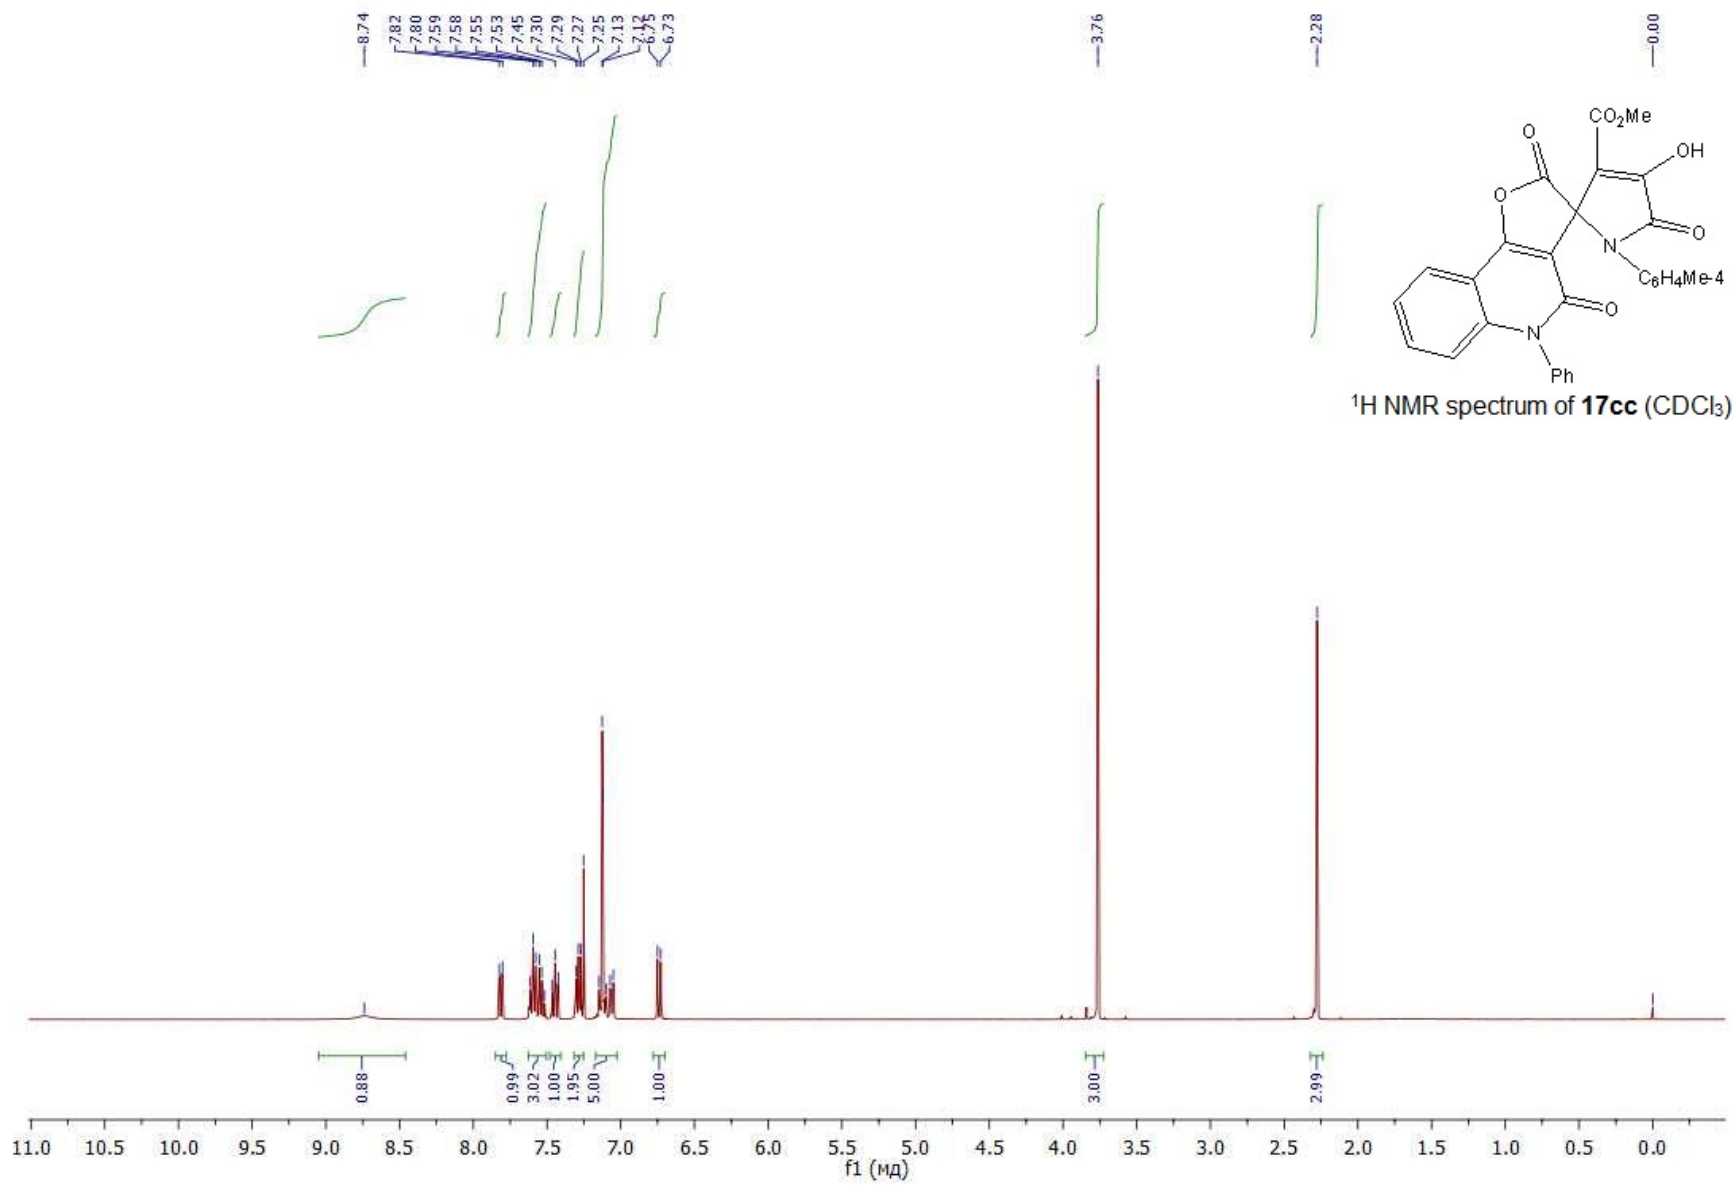

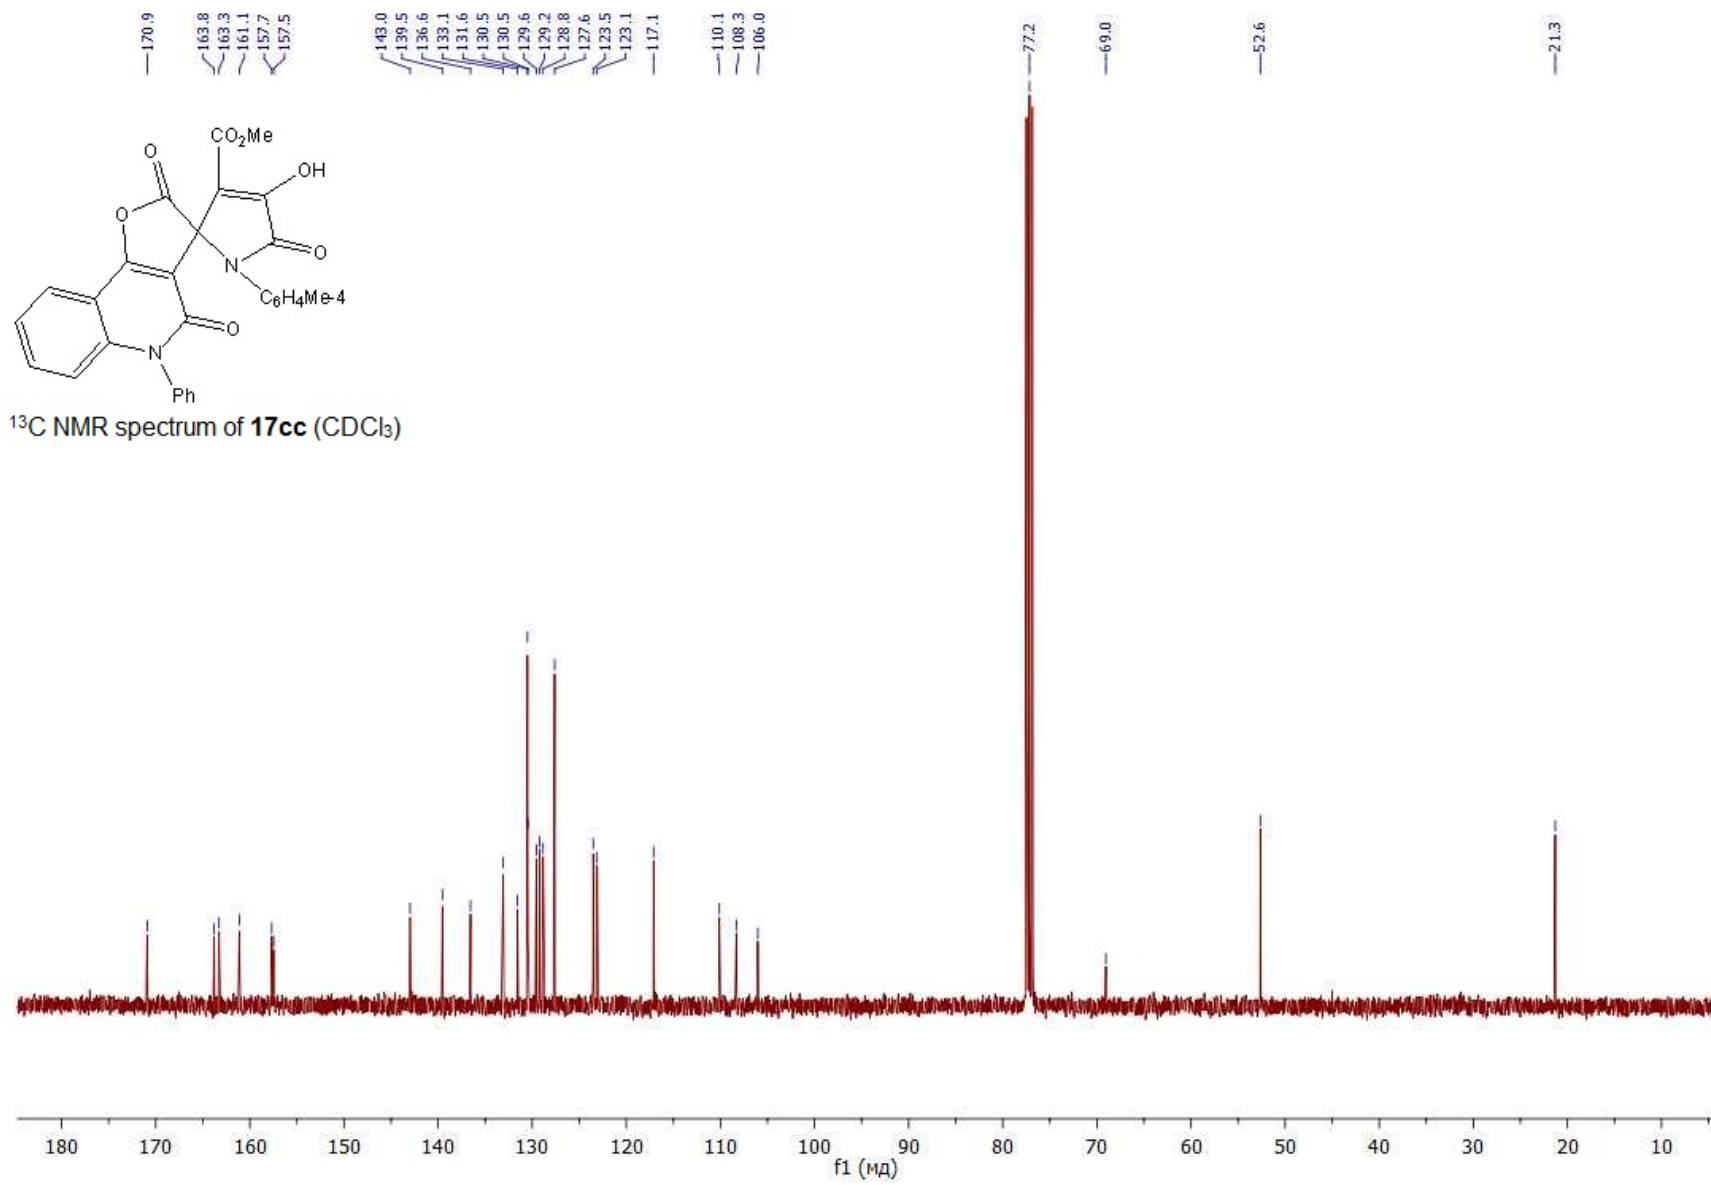

### Preparation of X-ray quality crystals

The crystals for XRD experiments were prepared by crystallization as follows: Drum vial (volume 15 mL) was charged with crude solid material (100 mg) and mixture (1:1:1:1) of four solvents: ethyl acetate, acetone, acetonitrile, and toluene. The mixture was heated to boil until solid material was fully dissolved, then covered with glass lead and allowed to cool down to room temperature. After three days the formed crystalline crop was filtered on a sintered funnel, which was turned upside down. Upon drying the crystals were gradually dropping down to a Petri dish. Several well-formed transparent X-ray quality crystals were picked manually.

### Crystal structure determination

The unit cell parameters and the X-ray diffraction intensities were measured on a Xcalibur Ruby diffractometer. The empirical absorption correction was introduced by multi-scan method using SCALE3 ABSPACK algorithm<sup>1</sup>. The structures were solved by direct method and refined by the full-matrix least-squares method in the anisotropic approximation for all non-hydrogen atoms using the SHELXS-97 and SHELXL-97<sup>2</sup> (**11ba**) or SHELXL-2014<sup>3</sup> and OLEX2<sup>4</sup> (**11db**) program packages. Hydrogen atoms bound to carbon were located from the Fourier synthesis of the electron density and refined using a riding model. The hydrogen atoms of hydroxyl groups were refined independently with isotropic displacement parameter.

*Crystal Data of 11ba.* C<sub>28</sub>H<sub>17</sub>NO<sub>8</sub>,  $M = 495.43$ , monoclinic,  $a = 8.2673(11) \text{ \AA}$ ,  $b = 18.169(3) \text{ \AA}$ ,  $c = 14.955(2) \text{ \AA}$ ,  $\beta = 91.962(13)^\circ$ ,  $V = 2245.1(6) \text{ \AA}^3$ ,  $T = 295(2) \text{ K}$ , space group  $P2_1/c$ ,  $Z = 4$ ,  $\mu(\text{Mo K}\alpha) = 0.109 \text{ mm}^{-1}$ . The final refinement parameters:  $R_1 = 0.0480$ ,  $wR_2 = 0.1208$  (for observed 4053 reflections with  $I > 2\sigma(I)$ );  $R_1 = 0.0658$ ,  $wR_2 = 0.1333$  (for all independent 5271 reflections),  $S = 1.059$ . Largest diff. peak and hole 0.240 and  $-0.217 \text{ e}\text{\AA}^{-3}$ .

*Crystal Data of 11db.* C<sub>29</sub>H<sub>20</sub>N<sub>2</sub>O<sub>6</sub>·C<sub>2</sub>H<sub>3</sub>N,  $M = 533.52$ , triclinic,  $a = 10.0480(16) \text{ \AA}$ ,  $b = 10.5278(12) \text{ \AA}$ ,  $c = 13.3170(16) \text{ \AA}$ ,  $\alpha = 83.352(10)^\circ$ ,  $\beta = 74.653(13)^\circ$ ,  $\gamma = 89.492(11)^\circ$ ,  $V = 1349.0(3) \text{ \AA}^3$ ,  $T = 295(2) \text{ K}$ , space group  $P-1$ ,  $Z = 2$ ,  $\mu(\text{Mo K}\alpha) = 0.093 \text{ mm}^{-1}$ . The final refinement parameters:  $R_1 = 0.0515$ ,  $wR_2 = 0.1284$  (for observed 4550 reflections with  $I > 2\sigma(I)$ );  $R_1 = 0.0729$ ,  $wR_2 = 0.1455$  (for all independent 6306 reflections),  $S = 1.035$ . Largest diff. peak and hole 0.197 and  $-0.193 \text{ e}\text{\AA}^{-3}$ .

CCDC 1486439 (**11ba**) and 1486440 (**11db**) contain the supplementary crystallographic data for this paper. The data can be obtained free of charge from The Cambridge Crystallographic Data Centre via <http://www.ccdc.cam.ac.uk>.

1. CrysAlisPro, Agilent Technologies, Version 1.171.37.33 (release 27-03-2014 CrysAlis171 .NET).
2. Sheldrick G.M. *Acta Cryst.* **2008**, *A64*, 112.
3. Sheldrick G.M. *Acta Cryst.* **2015**, *C71*, 3.
4. Dolomanov O.V., Bourhis L.J., Gildea R.J., Howard J.A.K., Puschmann H. *J. Appl. Cryst.* **2009**, *42*, 339.



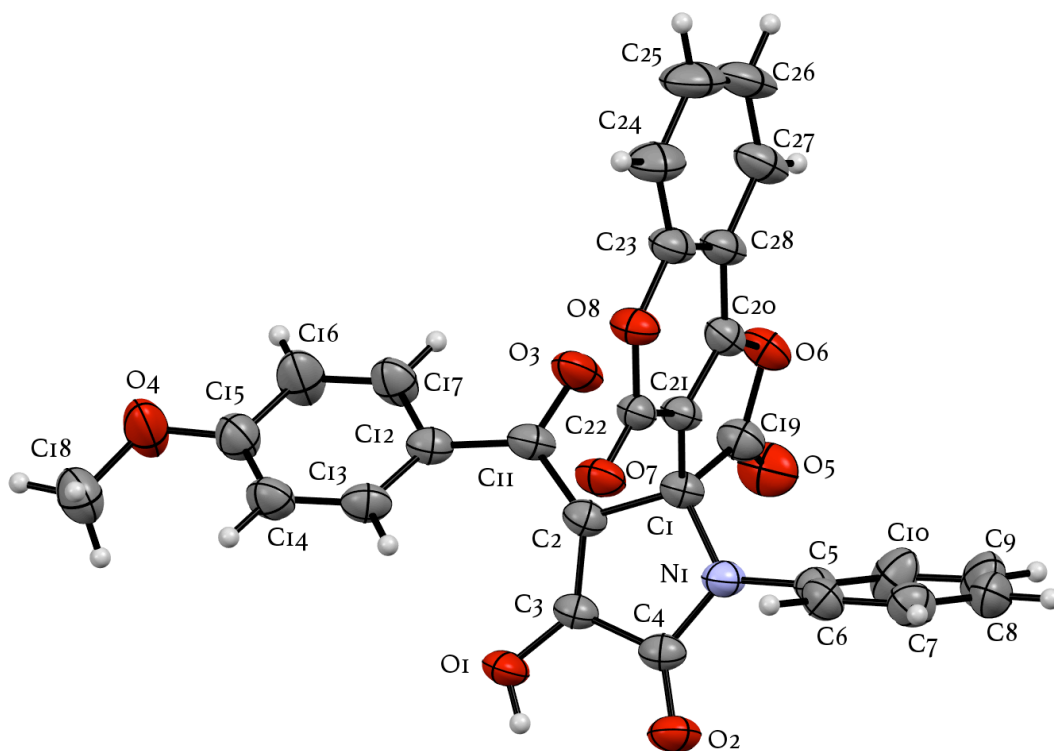

**Figure 1.** ORTEP drawing of compound **11ba**: showing 50% probability amplitude displacement ellipsoids.

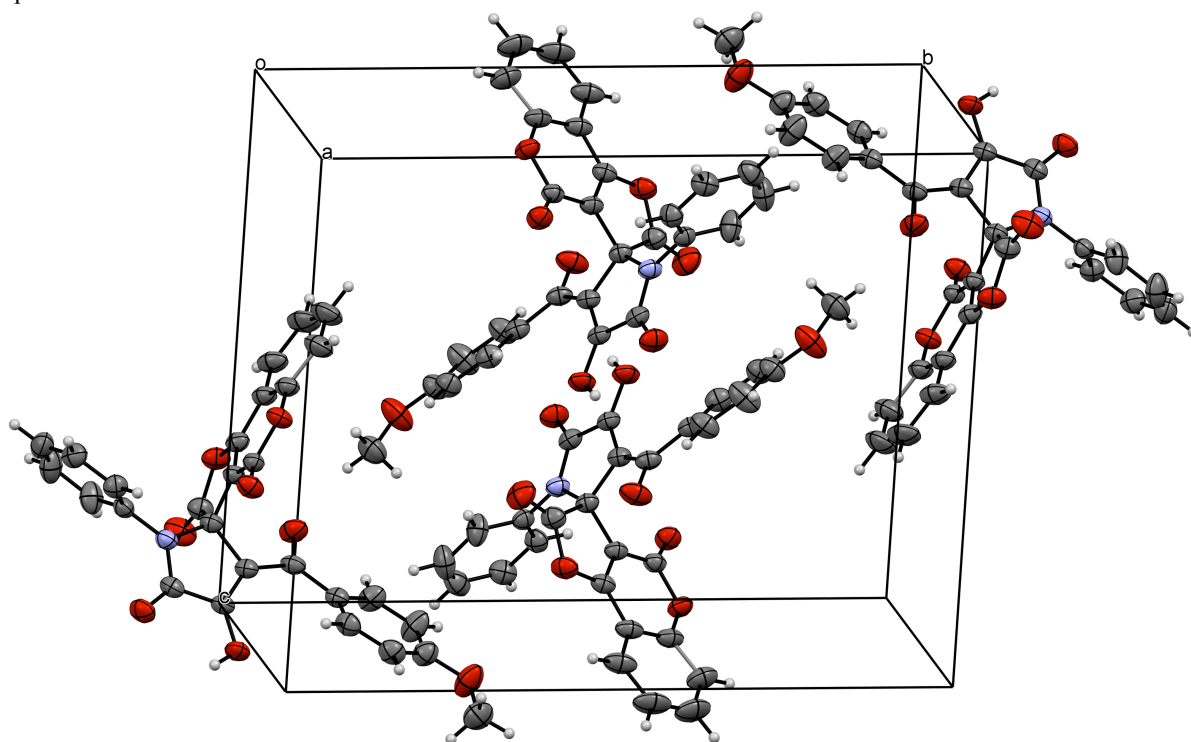

**Figure 2.** Packing diagram of the crystal structure of compound **11ba**.

**Fractional atomic coordinates and isotropic or equivalent isotropic displacement parameters ( $\text{\AA}^2$ ) of compound 11ba.**

|      | <i>x</i>      | <i>y</i>     | <i>z</i>      | $U_{\text{iso}}^*/U_{\text{eq}}$ |
|------|---------------|--------------|---------------|----------------------------------|
| H1   | 0.196 (3)     | 0.5217 (14)  | 0.5833 (18)   | 0.091 (8)*                       |
| O7   | -0.10593 (14) | 0.45365 (6)  | 0.30045 (7)   | 0.0452 (3)                       |
| O8   | -0.05211 (13) | 0.42250 (6)  | 0.16252 (7)   | 0.0422 (3)                       |
| O2   | 0.05126 (14)  | 0.61959 (6)  | 0.50532 (7)   | 0.0481 (3)                       |
| O1   | 0.24846 (15)  | 0.49477 (7)  | 0.54898 (7)   | 0.0454 (3)                       |
| O6   | 0.34408 (13)  | 0.55671 (6)  | 0.17134 (7)   | 0.0450 (3)                       |
| O3   | 0.45716 (15)  | 0.44537 (7)  | 0.28926 (7)   | 0.0541 (3)                       |
| N1   | 0.12561 (15)  | 0.59899 (7)  | 0.35966 (8)   | 0.0369 (3)                       |
| C20  | 0.21221 (17)  | 0.51171 (8)  | 0.16301 (10)  | 0.0361 (3)                       |
| C21  | 0.12847 (17)  | 0.50466 (8)  | 0.23821 (9)   | 0.0333 (3)                       |
| C22  | -0.01469 (18) | 0.46082 (8)  | 0.23954 (9)   | 0.0340 (3)                       |
| C11  | 0.39732 (18)  | 0.43620 (9)  | 0.36264 (10)  | 0.0378 (3)                       |
| C28  | 0.17419 (19)  | 0.47195 (9)  | 0.08319 (10)  | 0.0409 (4)                       |
| C3   | 0.22421 (17)  | 0.51860 (8)  | 0.46590 (9)   | 0.0342 (3)                       |
| C12  | 0.44289 (17)  | 0.37169 (8)  | 0.41705 (10)  | 0.0363 (3)                       |
| O5   | 0.46477 (15)  | 0.61610 (8)  | 0.28789 (9)   | 0.0622 (4)                       |
| C19  | 0.36013 (19)  | 0.57672 (9)  | 0.26213 (11)  | 0.0426 (4)                       |
| C4   | 0.12214 (17)  | 0.58522 (8)  | 0.44922 (10)  | 0.0366 (3)                       |
| C5   | 0.03917 (17)  | 0.65675 (8)  | 0.31350 (9)   | 0.0352 (3)                       |
| C13  | 0.34942 (18)  | 0.34214 (9)  | 0.48312 (10)  | 0.0424 (4)                       |
| H13  | 0.2535        | 0.3653       | 0.4976        | 0.051*                           |
| C23  | 0.0429 (2)    | 0.42445 (9)  | 0.08850 (10)  | 0.0417 (4)                       |
| C2   | 0.28003 (17)  | 0.49270 (8)  | 0.38895 (9)   | 0.0345 (3)                       |
| C1   | 0.21751 (17)  | 0.54313 (8)  | 0.31358 (9)   | 0.0344 (3)                       |
| C14  | 0.3962 (2)    | 0.27869 (9)  | 0.52793 (11)  | 0.0466 (4)                       |
| H14  | 0.3317        | 0.2593       | 0.5719        | 0.056*                           |
| O4   | 0.59913 (17)  | 0.18263 (8)  | 0.54856 (10)  | 0.0706 (4)                       |
| C16  | 0.6323 (2)    | 0.27271 (11) | 0.44016 (13)  | 0.0597 (5)                       |
| H16  | 0.7280        | 0.2493       | 0.4256        | 0.072*                           |
| C17  | 0.58449 (19)  | 0.33476 (10) | 0.39561 (12)  | 0.0490 (4)                       |
| H17  | 0.6472        | 0.3529       | 0.3501        | 0.059*                           |
| C7   | -0.2082 (2)   | 0.70909 (9)  | 0.25652 (11)  | 0.0473 (4)                       |
| H7   | -0.3202       | 0.7072       | 0.2488        | 0.057*                           |
| C6   | -0.12738 (19) | 0.65314 (9)  | 0.30158 (10)  | 0.0412 (4)                       |
| H6   | -0.1843       | 0.6134       | 0.3237        | 0.049*                           |
| C27  | 0.2629 (2)    | 0.47271 (11) | 0.00509 (11)  | 0.0533 (5)                       |
| H27  | 0.3494        | 0.5050       | -0.0002       | 0.064*                           |
| C15  | 0.5388 (2)    | 0.24422 (10) | 0.50730 (12)  | 0.0483 (4)                       |
| C24  | 0.0014 (2)    | 0.37674 (11) | 0.01960 (12)  | 0.0583 (5)                       |
| H24  | -0.0858       | 0.3448       | 0.0240        | 0.070*                           |
| C10  | 0.1236 (2)    | 0.71559 (9)  | 0.28022 (14)  | 0.0538 (5)                       |
| H10  | 0.2353        | 0.7182       | 0.2891        | 0.065*                           |
| C26  | 0.2214 (3)    | 0.42542 (14) | -0.06356 (11) | 0.0661 (6)                       |
| H26  | 0.2803        | 0.4256       | -0.1154       | 0.079*                           |
| C8   | -0.1239 (2)   | 0.76766 (10) | 0.22287 (12)  | 0.0537 (4)                       |
| H8   | -0.1791       | 0.8053       | 0.1927        | 0.064*                           |
| C18  | 0.5252 (3)    | 0.15709 (12) | 0.62683 (14)  | 0.0651 (5)                       |
| H18A | 0.4157        | 0.1427       | 0.6123        | 0.098*                           |
| H18B | 0.5254        | 0.1957       | 0.6706        | 0.098*                           |
| H18C | 0.5843        | 0.1156       | 0.6505        | 0.098*                           |
| C9   | 0.0418 (2)    | 0.77058 (10) | 0.23375 (14)  | 0.0613 (5)                       |
| H9   | 0.0988        | 0.8096       | 0.2098        | 0.074*                           |
| C25  | 0.0928 (3)    | 0.37773 (13) | -0.05596 (13) | 0.0692 (6)                       |
| H25  | 0.0672        | 0.3456       | -0.1027       | 0.083*                           |

Geometric parameters (Å, °) of compound 11ba.

|             |             |             |             |
|-------------|-------------|-------------|-------------|
| O7—C22      | 1.2094 (17) | C23—C24     | 1.381 (2)   |
| O8—C22      | 1.3722 (17) | C2—C1       | 1.529 (2)   |
| O8—C23      | 1.3793 (18) | C14—C15     | 1.379 (2)   |
| O2—C4       | 1.2128 (17) | C14—H14     | 0.9300      |
| O1—C3       | 1.3245 (18) | O4—C15      | 1.364 (2)   |
| O1—H1       | 0.84 (3)    | O4—C18      | 1.417 (2)   |
| O6—C20      | 1.3650 (19) | C16—C17     | 1.361 (2)   |
| O6—C19      | 1.4076 (19) | C16—C15     | 1.388 (2)   |
| O3—C11      | 1.2304 (18) | C16—H16     | 0.9300      |
| N1—C4       | 1.3638 (19) | C17—H17     | 0.9300      |
| N1—C5       | 1.4334 (19) | C7—C8       | 1.377 (3)   |
| N1—C1       | 1.4554 (19) | C7—C6       | 1.379 (2)   |
| C20—C21     | 1.3467 (19) | C7—H7       | 0.9300      |
| C20—C28     | 1.421 (2)   | C6—H6       | 0.9300      |
| C21—C22     | 1.427 (2)   | C27—C26     | 1.373 (3)   |
| C21—C1      | 1.498 (2)   | C27—H27     | 0.9300      |
| C11—C12     | 1.469 (2)   | C24—C25     | 1.381 (3)   |
| C11—C2      | 1.475 (2)   | C24—H24     | 0.9300      |
| C28—C23     | 1.391 (2)   | C10—C9      | 1.380 (3)   |
| C28—C27     | 1.401 (2)   | C10—H10     | 0.9300      |
| C3—C2       | 1.340 (2)   | C26—C25     | 1.379 (3)   |
| C3—C4       | 1.492 (2)   | C26—H26     | 0.9300      |
| C12—C13     | 1.383 (2)   | C8—C9       | 1.375 (3)   |
| C12—C17     | 1.396 (2)   | C8—H8       | 0.9300      |
| O5—C19      | 1.1772 (19) | C18—H18A    | 0.9600      |
| C19—C1      | 1.555 (2)   | C18—H18B    | 0.9600      |
| C5—C10      | 1.379 (2)   | C18—H18C    | 0.9600      |
| C5—C6       | 1.384 (2)   | C9—H9       | 0.9300      |
| C13—C14     | 1.382 (2)   | C25—H25     | 0.9300      |
| C13—H13     | 0.9300      |             |             |
| C22—O8—C23  | 122.85 (12) | C21—C1—C19  | 99.92 (11)  |
| C3—O1—H1    | 108.6 (18)  | C2—C1—C19   | 110.93 (12) |
| C20—O6—C19  | 106.94 (11) | C15—C14—C13 | 119.84 (15) |
| C4—N1—C5    | 125.47 (12) | C15—C14—H14 | 120.1       |
| C4—N1—C1    | 111.47 (12) | C13—C14—H14 | 120.1       |
| C5—N1—C1    | 122.84 (12) | C15—O4—C18  | 118.75 (15) |
| C21—C20—O6  | 114.36 (13) | C17—C16—C15 | 120.21 (16) |
| C21—C20—C28 | 123.22 (14) | C17—C16—H16 | 119.9       |
| O6—C20—C28  | 122.28 (13) | C15—C16—H16 | 119.9       |
| C20—C21—C22 | 120.99 (13) | C16—C17—C12 | 121.16 (16) |
| C20—C21—C1  | 109.30 (13) | C16—C17—H17 | 119.4       |
| C22—C21—C1  | 129.51 (13) | C12—C17—H17 | 119.4       |
| O7—C22—O8   | 116.68 (13) | C8—C7—C6    | 120.37 (16) |
| O7—C22—C21  | 127.55 (14) | C8—C7—H7    | 119.8       |
| O8—C22—C21  | 115.76 (12) | C6—C7—H7    | 119.8       |
| O3—C11—C12  | 119.93 (13) | C7—C6—C5    | 119.40 (15) |
| O3—C11—C2   | 115.58 (14) | C7—C6—H6    | 120.3       |
| C12—C11—C2  | 124.49 (13) | C5—C6—H6    | 120.3       |
| C23—C28—C27 | 119.07 (15) | C26—C27—C28 | 119.50 (19) |
| C23—C28—C20 | 114.70 (13) | C26—C27—H27 | 120.2       |
| C27—C28—C20 | 126.04 (16) | C28—C27—H27 | 120.2       |
| O1—C3—C2    | 130.20 (14) | O4—C15—C14  | 124.98 (16) |
| O1—C3—C4    | 119.25 (13) | O4—C15—C16  | 115.43 (15) |
| C2—C3—C4    | 110.54 (13) | C14—C15—C16 | 119.59 (16) |
| C13—C12—C17 | 118.08 (14) | C23—C24—C25 | 118.28 (19) |
| C13—C12—C11 | 124.51 (13) | C23—C24—H24 | 120.9       |

|                 |              |                 |              |
|-----------------|--------------|-----------------|--------------|
| C17—C12—C11     | 117.23 (14)  | C25—C24—H24     | 120.9        |
| O5—C19—O6       | 121.11 (15)  | C5—C10—C9       | 119.84 (16)  |
| O5—C19—C1       | 129.64 (15)  | C5—C10—H10      | 120.1        |
| O6—C19—C1       | 109.14 (12)  | C9—C10—H10      | 120.1        |
| O2—C4—N1        | 127.72 (14)  | C27—C26—C25     | 120.35 (18)  |
| O2—C4—C3        | 125.89 (14)  | C27—C26—H26     | 119.8        |
| N1—C4—C3        | 106.40 (12)  | C25—C26—H26     | 119.8        |
| C10—C5—C6       | 120.25 (15)  | C9—C8—C7        | 120.08 (16)  |
| C10—C5—N1       | 119.42 (14)  | C9—C8—H8        | 120.0        |
| C6—C5—N1        | 120.32 (13)  | C7—C8—H8        | 120.0        |
| C14—C13—C12     | 121.07 (14)  | O4—C18—H18A     | 109.5        |
| C14—C13—H13     | 119.5        | O4—C18—H18B     | 109.5        |
| C12—C13—H13     | 119.5        | H18A—C18—H18B   | 109.5        |
| O8—C23—C24      | 116.70 (16)  | O4—C18—H18C     | 109.5        |
| O8—C23—C28      | 121.91 (14)  | H18A—C18—H18C   | 109.5        |
| C24—C23—C28     | 121.40 (16)  | H18B—C18—H18C   | 109.5        |
| C3—C2—C11       | 136.27 (14)  | C8—C9—C10       | 120.03 (17)  |
| C3—C2—C1        | 107.76 (12)  | C8—C9—H9        | 120.0        |
| C11—C2—C1       | 115.42 (12)  | C10—C9—H9       | 120.0        |
| N1—C1—C21       | 115.51 (12)  | C26—C25—C24     | 121.37 (18)  |
| N1—C1—C2        | 103.75 (11)  | C26—C25—H25     | 119.3        |
| C21—C1—C2       | 114.84 (12)  | C24—C25—H25     | 119.3        |
| N1—C1—C19       | 112.18 (12)  |                 |              |
| C19—O6—C20—C21  | 5.75 (18)    | C4—N1—C1—C21    | 123.98 (14)  |
| C19—O6—C20—C28  | -170.13 (14) | C5—N1—C1—C21    | -50.89 (19)  |
| O6—C20—C21—C22  | 178.51 (13)  | C4—N1—C1—C2     | -2.60 (15)   |
| C28—C20—C21—C22 | -5.7 (2)     | C5—N1—C1—C2     | -177.47 (12) |
| O6—C20—C21—C1   | -6.12 (18)   | C4—N1—C1—C19    | -122.40 (14) |
| C28—C20—C21—C1  | 169.72 (13)  | C5—N1—C1—C19    | 62.73 (17)   |
| C23—O8—C22—O7   | -178.72 (13) | C20—C21—C1—N1   | 124.17 (14)  |
| C23—O8—C22—C21  | 1.22 (19)    | C22—C21—C1—N1   | -61.0 (2)    |
| C20—C21—C22—O7  | -175.00 (15) | C20—C21—C1—C2   | -115.09 (14) |
| C1—C21—C22—O7   | 10.7 (3)     | C22—C21—C1—C2   | 59.76 (19)   |
| C20—C21—C22—O8  | 5.1 (2)      | C20—C21—C1—C19  | 3.63 (15)    |
| C1—C21—C22—O8   | -169.28 (13) | C22—C21—C1—C19  | 178.49 (15)  |
| C21—C20—C28—C23 | -0.2 (2)     | C3—C2—C1—N1     | 1.07 (15)    |
| O6—C20—C28—C23  | 175.32 (14)  | C11—C2—C1—N1    | -171.82 (12) |
| C21—C20—C28—C27 | -175.11 (16) | C3—C2—C1—C21    | -125.93 (13) |
| O6—C20—C28—C27  | 0.4 (2)      | C11—C2—C1—C21   | 61.18 (17)   |
| O3—C11—C12—C13  | -157.20 (15) | C3—C2—C1—C19    | 121.71 (14)  |
| C2—C11—C12—C13  | 22.0 (2)     | C11—C2—C1—C19   | -51.18 (17)  |
| O3—C11—C12—C17  | 17.8 (2)     | O5—C19—C1—N1    | 52.9 (2)     |
| C2—C11—C12—C17  | -163.00 (15) | O6—C19—C1—N1    | -123.25 (13) |
| C20—O6—C19—O5   | -179.54 (16) | O5—C19—C1—C21   | 175.83 (19)  |
| C20—O6—C19—C1   | -2.99 (16)   | O6—C19—C1—C21   | -0.34 (15)   |
| C5—N1—C4—O2     | -2.4 (2)     | O5—C19—C1—C2    | -62.6 (2)    |
| C1—N1—C4—O2     | -177.07 (14) | O6—C19—C1—C2    | 121.24 (13)  |
| C5—N1—C4—C3     | 177.73 (13)  | C12—C13—C14—C15 | 0.5 (2)      |
| C1—N1—C4—C3     | 3.03 (16)    | C15—C16—C17—C12 | 1.0 (3)      |
| O1—C3—C4—O2     | -3.1 (2)     | C13—C12—C17—C16 | -2.0 (3)     |
| C2—C3—C4—O2     | 177.78 (15)  | C11—C12—C17—C16 | -177.31 (17) |
| O1—C3—C4—N1     | 176.81 (13)  | C8—C7—C6—C5     | 0.7 (2)      |
| C2—C3—C4—N1     | -2.31 (17)   | C10—C5—C6—C7    | -0.3 (2)     |
| C4—N1—C5—C10    | 109.74 (18)  | N1—C5—C6—C7     | -179.62 (14) |
| C1—N1—C5—C10    | -76.12 (19)  | C23—C28—C27—C26 | -1.7 (2)     |
| C4—N1—C5—C6     | -70.96 (19)  | C20—C28—C27—C26 | 173.04 (16)  |
| C1—N1—C5—C6     | 103.18 (17)  | C18—O4—C15—C14  | -9.7 (3)     |

|                 |              |                 |              |
|-----------------|--------------|-----------------|--------------|
| C17—C12—C13—C14 | 1.3 (2)      | C18—O4—C15—C16  | 170.01 (18)  |
| C11—C12—C13—C14 | 176.18 (15)  | C13—C14—C15—O4  | 178.21 (16)  |
| C22—O8—C23—C24  | 172.65 (14)  | C13—C14—C15—C16 | -1.5 (3)     |
| C22—O8—C23—C28  | -7.3 (2)     | C17—C16—C15—O4  | -178.98 (18) |
| C27—C28—C23—O8  | -178.18 (14) | C17—C16—C15—C14 | 0.7 (3)      |
| C20—C28—C23—O8  | 6.5 (2)      | O8—C23—C24—C25  | 179.33 (16)  |
| C27—C28—C23—C24 | 1.9 (2)      | C28—C23—C24—C25 | -0.8 (3)     |
| C20—C28—C23—C24 | -173.38 (15) | C6—C5—C10—C9    | -0.9 (3)     |
| O1—C3—C2—C11    | -7.6 (3)     | N1—C5—C10—C9    | 178.40 (16)  |
| C4—C3—C2—C11    | 171.38 (16)  | C28—C27—C26—C25 | 0.3 (3)      |
| O1—C3—C2—C1     | -178.31 (15) | C6—C7—C8—C9     | 0.2 (3)      |
| C4—C3—C2—C1     | 0.68 (16)    | C7—C8—C9—C10    | -1.5 (3)     |
| O3—C11—C2—C3    | -155.49 (18) | C5—C10—C9—C8    | 1.8 (3)      |
| C12—C11—C2—C3   | 25.3 (3)     | C27—C26—C25—C24 | 0.9 (3)      |
| O3—C11—C2—C1    | 14.7 (2)     | C23—C24—C25—C26 | -0.7 (3)     |
| C12—C11—C2—C1   | -164.56 (13) |                 |              |

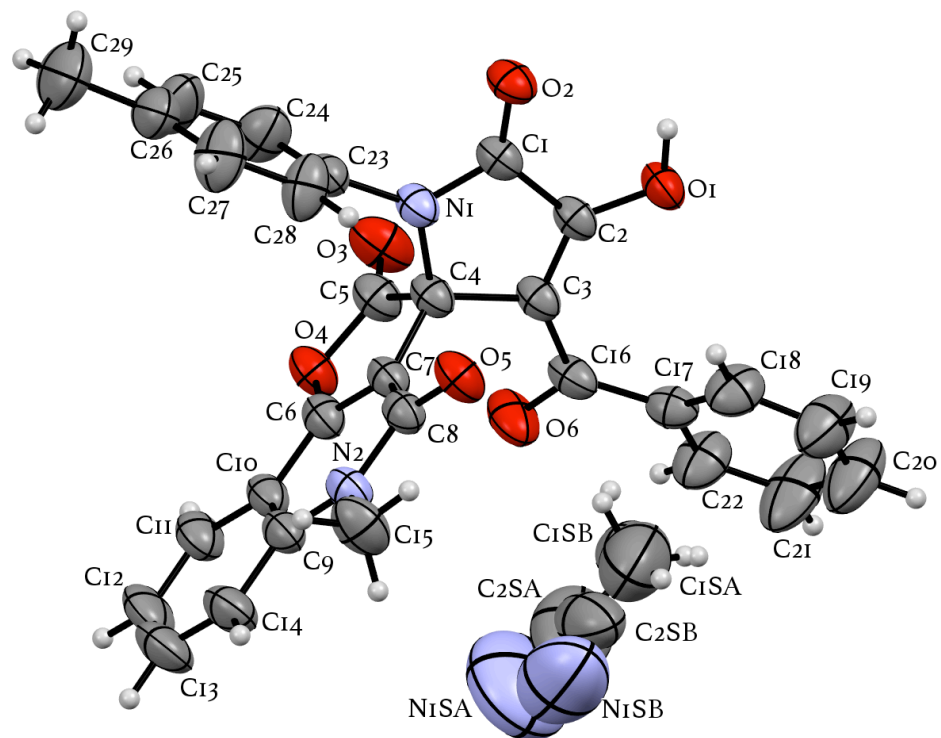

**Figure 3.** ORTEP drawing of compound **11db**: showing 50% probability amplitude displacement ellipsoids and a molecule of disordered crystallized solvent (acetonitrile).

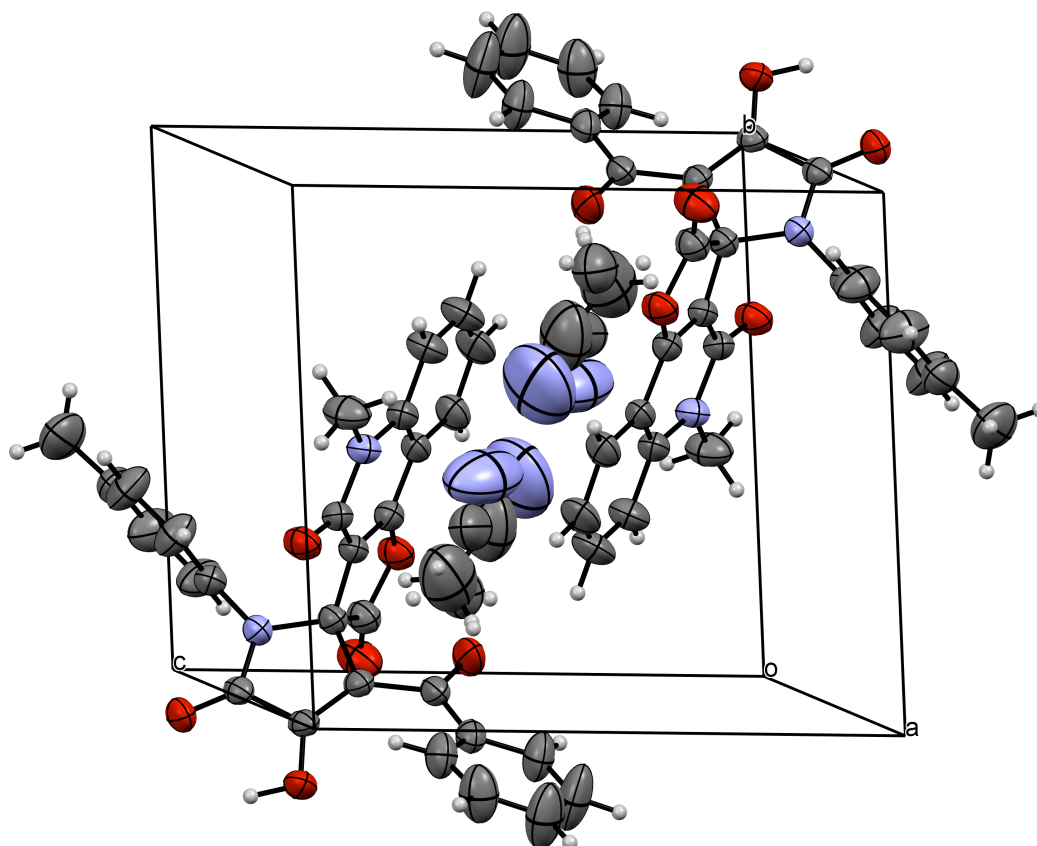

**Figure 4.** Packing diagram of the crystal structure of compound **11db**.

**Fractional atomic coordinates and isotropic or equivalent isotropic displacement parameters ( $\text{\AA}^2$ ) of compound 11db.**

|      | <i>x</i>     | <i>y</i>     | <i>z</i>      | $U_{\text{iso}}^*/U_{\text{eq}}$ | Occ. (<1) |
|------|--------------|--------------|---------------|----------------------------------|-----------|
| O1   | 0.50061 (12) | 1.15678 (9)  | 0.09013 (9)   | 0.0486 (3)                       |           |
| H1   | 0.533 (2)    | 1.182 (2)    | 0.013 (2)     | 0.097 (7)*                       |           |
| O2   | 0.72395 (11) | 1.05413 (10) | -0.05438 (8)  | 0.0482 (3)                       |           |
| O3   | 0.81103 (15) | 0.95631 (12) | 0.27246 (11)  | 0.0694 (4)                       |           |
| O4   | 0.73560 (12) | 0.75301 (10) | 0.32355 (9)   | 0.0518 (3)                       |           |
| O5   | 0.45732 (12) | 0.70715 (10) | 0.10042 (9)   | 0.0535 (3)                       |           |
| O6   | 0.49575 (15) | 0.91692 (12) | 0.38310 (9)   | 0.0690 (4)                       |           |
| N1   | 0.72537 (13) | 0.89679 (11) | 0.08132 (10)  | 0.0426 (3)                       |           |
| N2   | 0.47932 (14) | 0.53482 (11) | 0.21563 (11)  | 0.0464 (3)                       |           |
| C1   | 0.67953 (15) | 1.00324 (12) | 0.03470 (11)  | 0.0373 (3)                       |           |
| C2   | 0.56132 (15) | 1.04937 (12) | 0.11477 (11)  | 0.0377 (3)                       |           |
| C3   | 0.53799 (16) | 0.97166 (13) | 0.20524 (11)  | 0.0399 (3)                       |           |
| C4   | 0.64445 (16) | 0.86681 (13) | 0.19016 (11)  | 0.0408 (3)                       |           |
| C5   | 0.73900 (18) | 0.87173 (15) | 0.26519 (13)  | 0.0498 (4)                       |           |
| C6   | 0.64751 (16) | 0.67488 (14) | 0.29355 (12)  | 0.0429 (3)                       |           |
| C7   | 0.59258 (15) | 0.73116 (13) | 0.21810 (11)  | 0.0407 (3)                       |           |
| C8   | 0.50577 (16) | 0.66173 (13) | 0.17293 (12)  | 0.0416 (3)                       |           |
| C9   | 0.53282 (16) | 0.47705 (14) | 0.29613 (12)  | 0.0466 (4)                       |           |
| C10  | 0.62100 (17) | 0.54568 (14) | 0.33749 (12)  | 0.0461 (4)                       |           |
| C11  | 0.67841 (19) | 0.48668 (17) | 0.41599 (13)  | 0.0577 (4)                       |           |
| H11  | 0.7363       | 0.5328       | 0.4433        | 0.069*                           |           |
| C12  | 0.6480 (2)   | 0.36024 (19) | 0.45163 (16)  | 0.0724 (6)                       |           |
| H12  | 0.6862       | 0.3197       | 0.5030        | 0.087*                           |           |
| C13  | 0.5606 (2)   | 0.29268 (18) | 0.41143 (17)  | 0.0758 (6)                       |           |
| H13  | 0.5404       | 0.2070       | 0.4368        | 0.091*                           |           |
| C14  | 0.5033 (2)   | 0.34836 (16) | 0.33549 (16)  | 0.0647 (5)                       |           |
| H14  | 0.4447       | 0.3008       | 0.3099        | 0.078*                           |           |
| C15  | 0.3942 (2)   | 0.45865 (17) | 0.17008 (18)  | 0.0702 (6)                       |           |
| H15A | 0.3154       | 0.4237       | 0.2240        | 0.105*                           |           |
| H15B | 0.4475       | 0.3903       | 0.1390        | 0.105*                           |           |
| H15C | 0.3638       | 0.5120       | 0.1173        | 0.105*                           |           |
| C16  | 0.45246 (17) | 0.97585 (13) | 0.31357 (12)  | 0.0459 (4)                       |           |
| C17  | 0.32096 (17) | 1.04441 (14) | 0.34005 (12)  | 0.0460 (4)                       |           |
| C18  | 0.24201 (19) | 1.07195 (19) | 0.26998 (14)  | 0.0626 (5)                       |           |
| H18  | 0.2743       | 1.0527       | 0.2014        | 0.075*                           |           |
| C19  | 0.1153 (2)   | 1.1280 (3)   | 0.30147 (18)  | 0.0868 (7)                       |           |
| H19  | 0.0606       | 1.1429       | 0.2551        | 0.104*                           |           |
| C20  | 0.0701 (3)   | 1.1618 (3)   | 0.4012 (2)    | 0.1093 (10)                      |           |
| H20  | -0.0138      | 1.2023       | 0.4215        | 0.131*                           |           |
| C21  | 0.1489 (3)   | 1.1359 (3)   | 0.47106 (19)  | 0.1069 (10)                      |           |
| H21  | 0.1184       | 1.1596       | 0.5384        | 0.128*                           |           |
| C22  | 0.2719 (2)   | 1.0754 (2)   | 0.44179 (14)  | 0.0681 (5)                       |           |
| H22  | 0.3229       | 1.0550       | 0.4902        | 0.082*                           |           |
| C23  | 0.83317 (16) | 0.81754 (14) | 0.02992 (12)  | 0.0437 (4)                       |           |
| C24  | 0.96404 (19) | 0.82697 (18) | 0.04263 (18)  | 0.0683 (5)                       |           |
| H24  | 0.9833       | 0.8840       | 0.0856        | 0.082*                           |           |
| C25  | 1.06677 (19) | 0.7511 (2)   | -0.0089 (2)   | 0.0797 (7)                       |           |
| H25  | 1.1547       | 0.7570       | 0.0007        | 0.096*                           |           |
| C26  | 1.0423 (2)   | 0.66723 (18) | -0.07409 (17) | 0.0658 (5)                       |           |
| C27  | 0.9108 (2)   | 0.6582 (2)   | -0.08420 (18) | 0.0756 (6)                       |           |
| H27  | 0.8915       | 0.6010       | -0.1270       | 0.091*                           |           |
| C28  | 0.8059 (2)   | 0.73184 (19) | -0.03245 (15) | 0.0647 (5)                       |           |
| H28  | 0.7171       | 0.7232       | -0.0400       | 0.078*                           |           |

|      |             |             |             |            |     |
|------|-------------|-------------|-------------|------------|-----|
| C29  | 1.1561 (3)  | 0.5895 (3)  | -0.1345 (2) | 0.1014 (9) |     |
| H29A | 1.1789      | 0.6221      | -0.2075     | 0.152*     |     |
| H29B | 1.1257      | 0.5018      | -0.1259     | 0.152*     |     |
| H29C | 1.2361      | 0.5952      | -0.1086     | 0.152*     |     |
| N1SA | 0.1293 (15) | 0.5474 (13) | 0.3909 (9)  | 0.256 (6)  | 0.5 |
| C1SA | 0.1077 (18) | 0.7308 (14) | 0.2621 (13) | 0.165 (7)  | 0.5 |
| H1SA | 0.0398      | 0.7051      | 0.2291      | 0.248*     | 0.5 |
| H1SB | 0.1951      | 0.7451      | 0.2107      | 0.248*     | 0.5 |
| H1SC | 0.0798      | 0.8083      | 0.2925      | 0.248*     | 0.5 |
| C2SA | 0.120 (2)   | 0.6348 (15) | 0.3403 (11) | 0.159 (5)  | 0.5 |
| N1SB | 0.0491 (8)  | 0.5372 (7)  | 0.3141 (10) | 0.204 (4)  | 0.5 |
| C1SB | 0.1412 (15) | 0.7627 (9)  | 0.2911 (10) | 0.101 (3)  | 0.5 |
| H1SD | 0.1791      | 0.7757      | 0.3482      | 0.151*     | 0.5 |
| H1SE | 0.0652      | 0.8188      | 0.2913      | 0.151*     | 0.5 |
| H1SF | 0.2110      | 0.7809      | 0.2260      | 0.151*     | 0.5 |
| C2SB | 0.0949 (12) | 0.6357 (8)  | 0.3021 (9)  | 0.118 (4)  | 0.5 |

**Geometric parameters (Å, °) of compound 11db.**

|          |             |            |             |
|----------|-------------|------------|-------------|
| O1—H1    | 1.00 (3)    | C16—C17    | 1.479 (2)   |
| O1—C2    | 1.3290 (17) | C17—C18    | 1.382 (2)   |
| O2—C1    | 1.2126 (17) | C17—C22    | 1.390 (2)   |
| O3—C5    | 1.181 (2)   | C18—H18    | 0.9300      |
| O4—C5    | 1.3889 (18) | C18—C19    | 1.381 (3)   |
| O4—C6    | 1.3768 (19) | C19—H19    | 0.9300      |
| O5—C8    | 1.2393 (18) | C19—C20    | 1.372 (4)   |
| O6—C16   | 1.2276 (18) | C20—H20    | 0.9300      |
| N1—C1    | 1.3544 (18) | C20—C21    | 1.376 (4)   |
| N1—C4    | 1.4616 (19) | C21—H21    | 0.9300      |
| N1—C23   | 1.4359 (19) | C21—C22    | 1.369 (3)   |
| N2—C8    | 1.3890 (18) | C22—H22    | 0.9300      |
| N2—C9    | 1.399 (2)   | C23—C24    | 1.375 (2)   |
| N2—C15   | 1.464 (2)   | C23—C28    | 1.370 (2)   |
| C1—C2    | 1.491 (2)   | C24—H24    | 0.9300      |
| C2—C3    | 1.3421 (19) | C24—C25    | 1.383 (3)   |
| C3—C4    | 1.523 (2)   | C25—H25    | 0.9300      |
| C3—C16   | 1.476 (2)   | C25—C26    | 1.373 (3)   |
| C4—C5    | 1.555 (2)   | C26—C27    | 1.368 (3)   |
| C4—C7    | 1.4957 (19) | C26—C29    | 1.508 (3)   |
| C6—C7    | 1.347 (2)   | C27—H27    | 0.9300      |
| C6—C10   | 1.415 (2)   | C27—C28    | 1.383 (3)   |
| C7—C8    | 1.431 (2)   | C28—H28    | 0.9300      |
| C9—C10   | 1.404 (2)   | C29—H29A   | 0.9600      |
| C9—C14   | 1.399 (2)   | C29—H29B   | 0.9600      |
| C10—C11  | 1.405 (2)   | C29—H29C   | 0.9600      |
| C11—H11  | 0.9300      | N1SA—C2SA  | 1.094 (12)  |
| C11—C12  | 1.369 (3)   | C1SA—H1SA  | 0.9600      |
| C12—H12  | 0.9300      | C1SA—H1SB  | 0.9600      |
| C12—C13  | 1.382 (3)   | C1SA—H1SC  | 0.9600      |
| C13—H13  | 0.9300      | C1SA—C2SA  | 1.394 (13)  |
| C13—C14  | 1.365 (3)   | N1SB—C2SB  | 1.116 (9)   |
| C14—H14  | 0.9300      | C1SB—H1SD  | 0.9600      |
| C15—H15A | 0.9600      | C1SB—H1SE  | 0.9600      |
| C15—H15B | 0.9600      | C1SB—H1SF  | 0.9600      |
| C15—H15C | 0.9600      | C1SB—C2SB  | 1.398 (10)  |
| C2—O1—H1 | 109.0 (14)  | O6—C16—C3  | 116.05 (15) |
| C6—O4—C5 | 107.13 (11) | O6—C16—C17 | 120.35 (14) |



|               |             |                |             |
|---------------|-------------|----------------|-------------|
| C1—N1—C4      | 111.27 (12) | C3—C16—C17     | 123.59 (13) |
| C1—N1—C23     | 125.09 (12) | C18—C17—C16    | 122.78 (15) |
| C23—N1—C4     | 123.52 (11) | C18—C17—C22    | 119.13 (17) |
| C8—N2—C9      | 123.56 (14) | C22—C17—C16    | 117.99 (15) |
| C8—N2—C15     | 116.93 (13) | C17—C18—H18    | 119.9       |
| C9—N2—C15     | 119.48 (13) | C19—C18—C17    | 120.19 (18) |
| O2—C1—N1      | 128.06 (14) | C19—C18—H18    | 119.9       |
| O2—C1—C2      | 125.13 (13) | C18—C19—H19    | 120.0       |
| N1—C1—C2      | 106.81 (12) | C20—C19—C18    | 120.0 (2)   |
| O1—C2—C1      | 119.02 (12) | C20—C19—H19    | 120.0       |
| O1—C2—C3      | 130.60 (15) | C19—C20—H20    | 120.0       |
| C3—C2—C1      | 110.33 (12) | C19—C20—C21    | 120.1 (2)   |
| C2—C3—C4      | 107.76 (13) | C21—C20—H20    | 120.0       |
| C2—C3—C16     | 135.59 (14) | C20—C21—H21    | 119.9       |
| C16—C3—C4     | 115.85 (12) | C22—C21—C20    | 120.2 (2)   |
| N1—C4—C3      | 103.82 (11) | C22—C21—H21    | 119.9       |
| N1—C4—C5      | 110.02 (12) | C17—C22—H22    | 119.9       |
| N1—C4—C7      | 114.09 (12) | C21—C22—C17    | 120.28 (19) |
| C3—C4—C5      | 111.11 (12) | C21—C22—H22    | 119.9       |
| C7—C4—C3      | 117.57 (13) | C24—C23—N1     | 120.52 (15) |
| C7—C4—C5      | 100.32 (11) | C28—C23—N1     | 119.91 (14) |
| O3—C5—O4      | 121.49 (15) | C28—C23—C24    | 119.57 (16) |
| O3—C5—C4      | 129.07 (14) | C23—C24—H24    | 120.2       |
| O4—C5—C4      | 109.34 (13) | C23—C24—C25    | 119.52 (19) |
| O4—C6—C10     | 121.97 (13) | C25—C24—H24    | 120.2       |
| C7—C6—O4      | 114.32 (12) | C24—C25—H25    | 119.1       |
| C7—C6—C10     | 123.70 (15) | C26—C25—C24    | 121.73 (19) |
| C6—C7—C4      | 108.88 (13) | C26—C25—H25    | 119.1       |
| C6—C7—C8      | 121.78 (13) | C25—C26—C29    | 121.6 (2)   |
| C8—C7—C4      | 129.25 (12) | C27—C26—C25    | 117.64 (18) |
| O5—C8—N2      | 120.68 (14) | C27—C26—C29    | 120.7 (2)   |
| O5—C8—C7      | 124.49 (13) | C26—C27—H27    | 119.1       |
| N2—C8—C7      | 114.82 (13) | C26—C27—C28    | 121.7 (2)   |
| N2—C9—C10     | 120.83 (13) | C28—C27—H27    | 119.1       |
| N2—C9—C14     | 120.97 (16) | C23—C28—C27    | 119.78 (18) |
| C14—C9—C10    | 118.18 (15) | C23—C28—H28    | 120.1       |
| C9—C10—C6     | 115.26 (14) | C27—C28—H28    | 120.1       |
| C9—C10—C11    | 120.93 (14) | C26—C29—H29A   | 109.5       |
| C11—C10—C6    | 123.81 (16) | C26—C29—H29B   | 109.5       |
| C10—C11—H11   | 120.5       | C26—C29—H29C   | 109.5       |
| C12—C11—C10   | 119.05 (19) | H29A—C29—H29B  | 109.5       |
| C12—C11—H11   | 120.5       | H29A—C29—H29C  | 109.5       |
| C11—C12—H12   | 119.9       | H29B—C29—H29C  | 109.5       |
| C11—C12—C13   | 120.12 (17) | H1SA—C1SA—H1SB | 109.5       |
| C13—C12—H12   | 119.9       | H1SA—C1SA—H1SC | 109.5       |
| C12—C13—H13   | 119.1       | H1SB—C1SA—H1SC | 109.5       |
| C14—C13—C12   | 121.73 (17) | C2SA—C1SA—H1SA | 109.5       |
| C14—C13—H13   | 119.1       | C2SA—C1SA—H1SB | 109.5       |
| C9—C14—H14    | 120.0       | C2SA—C1SA—H1SC | 109.5       |
| C13—C14—C9    | 120.0 (2)   | N1SA—C2SA—C1SA | 169.3 (19)  |
| C13—C14—H14   | 120.0       | H1SD—C1SB—H1SE | 109.5       |
| N2—C15—H15A   | 109.5       | H1SD—C1SB—H1SF | 109.5       |
| N2—C15—H15B   | 109.5       | H1SE—C1SB—H1SF | 109.5       |
| N2—C15—H15C   | 109.5       | C2SB—C1SB—H1SD | 109.5       |
| H15A—C15—H15B | 109.5       | C2SB—C1SB—H1SE | 109.5       |
| H15A—C15—H15C | 109.5       | C2SB—C1SB—H1SF | 109.5       |
| H15B—C15—H15C | 109.5       | N1SB—C2SB—C1SB | 175.2 (13)  |

|                |              |                 |              |
|----------------|--------------|-----------------|--------------|
| O1—C2—C3—C4    | -176.63 (14) | C6—O4—C5—O3     | -177.17 (17) |
| O1—C2—C3—C16   | -7.8 (3)     | C6—O4—C5—C4     | -0.66 (17)   |
| O2—C1—C2—O1    | -2.4 (2)     | C6—C7—C8—O5     | -176.82 (15) |
| O2—C1—C2—C3    | 179.86 (14)  | C6—C7—C8—N2     | 2.3 (2)      |
| O4—C6—C7—C4    | -0.86 (18)   | C6—C10—C11—C12  | -178.74 (17) |
| O4—C6—C7—C8    | 175.99 (13)  | C7—C4—C5—O3     | 176.35 (19)  |
| O4—C6—C10—C9   | -177.75 (14) | C7—C4—C5—O4     | 0.18 (16)    |
| O4—C6—C10—C11  | 1.4 (2)      | C7—C6—C10—C9    | 0.6 (2)      |
| O6—C16—C17—C18 | -155.89 (17) | C7—C6—C10—C11   | 179.83 (15)  |
| O6—C16—C17—C22 | 20.3 (2)     | C8—N2—C9—C10    | -1.4 (2)     |
| N1—C1—C2—O1    | 177.24 (12)  | C8—N2—C9—C14    | -179.51 (15) |
| N1—C1—C2—C3    | -0.49 (16)   | C9—N2—C8—O5     | 178.78 (14)  |
| N1—C4—C5—O3    | 55.8 (2)     | C9—N2—C8—C7     | -0.3 (2)     |
| N1—C4—C5—O4    | -120.34 (13) | C9—C10—C11—C12  | 0.4 (3)      |
| N1—C4—C7—C6    | 117.93 (14)  | C10—C6—C7—C4    | -179.36 (14) |
| N1—C4—C7—C8    | -58.6 (2)    | C10—C6—C7—C8    | -2.5 (2)     |
| N1—C23—C24—C25 | -179.00 (17) | C10—C9—C14—C13  | -0.5 (3)     |
| N1—C23—C28—C27 | 178.20 (17)  | C10—C11—C12—C13 | -0.8 (3)     |
| N2—C9—C10—C6   | 1.3 (2)      | C11—C12—C13—C14 | 0.5 (3)      |
| N2—C9—C10—C11  | -177.92 (14) | C12—C13—C14—C9  | 0.1 (3)      |
| N2—C9—C14—C13  | 177.65 (17)  | C14—C9—C10—C6   | 179.42 (15)  |
| C1—N1—C4—C3    | 0.44 (15)    | C14—C9—C10—C11  | 0.2 (2)      |
| C1—N1—C4—C5    | -118.54 (13) | C15—N2—C8—O5    | 0.8 (2)      |
| C1—N1—C4—C7    | 129.64 (13)  | C15—N2—C8—C7    | -178.32 (15) |
| C1—N1—C23—C24  | 101.64 (19)  | C15—N2—C9—C10   | 176.49 (16)  |
| C1—N1—C23—C28  | -78.3 (2)    | C15—N2—C9—C14   | -1.6 (2)     |
| C1—C2—C3—C4    | 0.75 (16)    | C16—C3—C4—N1    | -172.08 (12) |
| C1—C2—C3—C16   | 169.60 (16)  | C16—C3—C4—C5    | -53.86 (17)  |
| C2—C3—C4—N1    | -0.73 (15)   | C16—C3—C4—C7    | 60.87 (18)   |
| C2—C3—C4—C5    | 117.49 (13)  | C16—C17—C18—C19 | 175.34 (18)  |
| C2—C3—C4—C7    | -127.79 (14) | C16—C17—C22—C21 | -178.3 (2)   |
| C2—C3—C16—O6   | -151.39 (18) | C17—C18—C19—C20 | 2.9 (4)      |
| C2—C3—C16—C17  | 29.4 (3)     | C18—C17—C22—C21 | -1.9 (3)     |
| C3—C4—C5—O3    | -58.6 (2)    | C18—C19—C20—C21 | -2.2 (5)     |
| C3—C4—C5—O4    | 125.25 (14)  | C19—C20—C21—C22 | -0.6 (5)     |
| C3—C4—C7—C6    | -120.16 (14) | C20—C21—C22—C17 | 2.6 (4)      |
| C3—C4—C7—C8    | 63.3 (2)     | C22—C17—C18—C19 | -0.9 (3)     |
| C3—C16—C17—C18 | 23.3 (2)     | C23—N1—C1—O2    | -4.3 (2)     |
| C3—C16—C17—C22 | -160.45 (16) | C23—N1—C1—C2    | 176.08 (13)  |
| C4—N1—C1—O2    | 179.62 (14)  | C23—N1—C4—C3    | -175.73 (13) |
| C4—N1—C1—C2    | -0.01 (16)   | C23—N1—C4—C5    | 65.30 (17)   |
| C4—N1—C23—C24  | -82.7 (2)    | C23—N1—C4—C7    | -46.52 (19)  |
| C4—N1—C23—C28  | 97.34 (19)   | C23—C24—C25—C26 | 0.9 (3)      |
| C4—C3—C16—O6   | 16.8 (2)     | C24—C23—C28—C27 | -1.7 (3)     |
| C4—C3—C16—C17  | -162.45 (13) | C24—C25—C26—C27 | -1.9 (3)     |
| C4—C7—C8—O5    | -0.7 (3)     | C24—C25—C26—C29 | 176.8 (2)    |
| C4—C7—C8—N2    | 178.42 (14)  | C25—C26—C27—C28 | 1.0 (3)      |
| C5—O4—C6—C7    | 0.97 (18)    | C26—C27—C28—C23 | 0.7 (3)      |
| C5—O4—C6—C10   | 179.50 (14)  | C28—C23—C24—C25 | 0.9 (3)      |
| C5—C4—C7—C6    | 0.38 (16)    | C29—C26—C27—C28 | -177.7 (2)   |
| C5—C4—C7—C8    | -176.16 (15) |                 |              |
